# Supplementary material for: Regulatory Response to Carbon Starvation in Caulobacter crescentus
Source: PLoS One. 2011 Apr 11;6(4):e18179. doi: 10.1371/journal.pone.0018179 (PMC3073932; doi:10.1371/journal.pone.0018179)
Supplement: Table S3 — List of transcripts that change significantly upon carbon starvation. Gene ID (for strains CB15 and CB15N), annotation, COG category (if applicable), average fold change and corresponding standard deviation are shown for the transcripts that were found to change reproducibly in cells starved for carbon for 30 and/or 60 min. For each transcript it is also indicated whether it was previously classified as cell cycle regulated [24]. (XLS) [file pone.0018179.s003.xls]

## Sheet: upregulated transcripts
Table S3. List of transcripts that change significantly upon carbon starvation (supporting data for the paper "Regulatory Response to Carbon Starvation in Caulobacter crescentus" by Britos et al.)
Gene ID CB15	Gene ID NA1000	Annotation	Gene Name	COG	Average 30 min -G/+G	Average 60 min -G/+G	Std. Dev 30 min -G/+G	Std. Dev 60 min -G/+G	Cell cycle regulated mRNA? (Laub et. al., 2000) (1=yes; 0=no)
CC_1764	CCNA_01841	Isocitrate lyase	CCNA_01841	[C] Energy production and conversion	66.7693	35.6696	10.2184	17.6759	0
CC_2644	CCNA_02727	PhoH protein	CCNA_02727	[T] Signal transduction mechanisms	47.1844	57.2373	0.491335	4.6336	1
CC_3546	CCNA_03660	Usg protein	CCNA_03660	[E] Amino acid transport and metabolism	45.9267	56.1665	5.77604	13.9684	0
CC_3207	CCNA_03313	Hypothetical protein	CCNA_03313	Not classified	38.9276	53.6049	5.15167	8.49957	0
CC_1765	CCNA_01843	Malate synthase	CCNA_01843	[C] Energy production and conversion	29.8866	11.3443	4.93697	1.12799	0
CC_3161	CCNA_03263	TonB-dependent receptor	CCNA_03263	[P] Inorganic ion transport and metabolism	25.0595	45.3675	0.293768	13.9978	0
CC_2348	CCNA_02433	hypothetical protein	CCNA_02433	Not classified	20.3962	24.931	2.83527	0.378112	0
CC_2626	CCNA_02709	CBS domain containing protein	CCNA_02709	[T] Signal transduction mechanisms	16.2682	21.6911	0.275399	2.75327	0
CC_1774	CCNA_01852	Major facilitator superfamily transporter	CCNA_01852	Not classified	15.3098	15.0946	1.26531	0.294108	0
CC_0412	CCNA_00417	Hypothetical protein	CCNA_00417	[S] Function unknown	14.0532	16.5286	0.787662	2.61784	0
CC_2200	CCNA_02283	HNH endonuclease family protein	CCNA_02283	[V] Defense mechanisms	13.1686	14.5448	1.84154	1.00433	0
CC_2162	CCNA_02244	Aminotransferase class I family	CCNA_02244	[E] Amino acid transport and metabolism	12.2405	6.68268	0.192767	1.43086	0
CC_3164	CCNA_03267	Hypothetical transcriptional regulatory protein	CCNA_03267	[K] Transcription	11.8893	12.7689	6.79082	5.90171	0
CC_3346	CCNA_03456	Lipase	CCNA_03456	[I] Lipid transport and metabolism	11.2828	10.8801	1.98791	4.76499	0
CC_0945	CCNA_00994	Oxidoreductase, GMC family	CCNA_00994	[E] Amino acid transport and metabolism	10.4543	16.3996	1.32744	1.54567	0
CC_0947	CCNA_00996	Enoyl-CoA hydratase	CCNA_00996	[I] Lipid transport and metabolism	11.1402	9.8943	1.46949	0.1303	0
CC_0698	CCNA_00734	GumN superfamily protein	CCNA_00734	Not classified	10.3045	9.50299	2.49915	2.44219	0
CC_0885	CCNA_00929	Diaminohydroxyphosphoribosylaminopyrimidine deaminase / 5-amino-6-(5-phosphoribosylamino)uracil reductase	CCNA_00929	[H] Coenzyme transport and metabolism	1.91367	10.7648	0.51173	0.153895	1
CC_0886	CCNA_00930	Riboflavin synthase alpha chain	CCNA_00930	[H] Coenzyme transport and metabolism	1.29105	10.4696	0.250346	1.63476	1
CC_0626	CCNA_00662	Hypothetical protein	CCNA_00662	Not classified	9.84664	8.97242	0.797891	0.224352	0
CC_3291	CCNA_03400	Hypothetical protein	CCNA_03400	[S] Function unknown	10.4409	13.0645	1.11933	3.1292	1
CC_0411	CCNA_00416	Hypothetical protein	CCNA_00416	[S] Function unknown	9.7759	14.7591	1.71502	0.678247	0
CC_2485	CCNA_02570	Transporter	CCNA_02570	[G] Carbohydrate transport and metabolism	9.76041	10.1509	1.02051	0.0546058	0
CC_2754	CCNA_02840	Transcriptional regulator	CCNA_02840	[K] Transcription	9.90466	18.3689	1.0193	0.42771	0
CC_3337	CCNA_03445	Aminopeptidase	CCNA_03445	[R] General function prediction only	9.15693	8.75663	0.286561	1.36691	0
CC_2576	CCNA_02659	two-component receiver domain protein	CCNA_02659	[T] Signal transduction mechanisms	8.63462	10.9373	0.475998	0.704386	0
CC_1452	CCNA_01519	Universal stress protein family	uspA	Not classified	8.34539	10.9666	0.885747	1.93072	0
CC_2468	CCNA_02553	ATP-dependent clp protease ATP-binding subunit clpA	clpA	[O] Posttranslational modification	8.33529	9.73009	1.82972	1.51082	1
CC_2031	CCNA_02111	PilF-related tetratricopeptide repeat protein	CCNA_02111	[N] Cell motility	8.38841	12.4035	0.25568	0.232964	0
CC_2577	CCNA_02660	Pyridoxamine 5'-phosphate oxidase family protein	CCNA_02660	[R] General function prediction only	8.07431	12.4825	0.228145	0.0278116	0
CC_1026	CCNA_01078	Methyltransferase	CCNA_01078	[R] General function prediction only	8.33948	8.80042	2.23087	1.75056	0
CC_2613	CCNA_02696	Glutamyl-tRNA(Gln) amidotransferase subunit A	CCNA_02696	[J] Translation	8.10979	7.32021	0.967928	1.24786	0
CC_3140	CCNA_03242	Succinate-semialdehyde dehydrogenase [NADP+]	CCNA_03242	[C] Energy production and conversion	8.49361	6.67941	0.596833	1.66409	0
CC_0800	CCNA_00842	Hypothetical protein	CCNA_00842	Not classified	8.2365	10.5892	1.41838	1.88243	0
CC_3491	CCNA_03605	Hypothetical protein	CCNA_03605	Not classified	8.1949	10.0728	0.968263	1.05736	1
CC_2467	CCNA_02552	ATP-dependent Clp protease adaptor protein ClpS	clpS	[S] Function unknown	8.46544	8.79948	1.64968	1.52445	0
CC_1707	CCNA_01779	Hypothetical protein	CCNA_01779	Not classified	7.8523	7.41633	1.23247	1.19103	0
CC_0887	CCNA_00931	GTP cyclohydrolase II / 3,4-dihydroxy-2-butanone-4-phosphate synthase	CCNA_00931	[H] Coenzyme transport and metabolism	0.587066	8.04384	0.259624	2.37299	0
CC_2111	CCNA_02196	Hypothetical membrane spanning protein	CCNA_02196	[S] Function unknown	7.93181	9.51976	0.302469	1.13241	0
CC_3189	CCNA_03293	Enoyl-CoA hydratase / Delta(3)-cis-delta(2)-trans-enoyl-CoA isomerase / 3-hydroxyacyl-CoA dehydrogenase / 3-hydroxybutyryl-CoA epimerase	CCNA_03293	[I] Lipid transport and metabolism	7.88886	6.75198	0.385252	0.581962	0
CC_2874	CCNA_02967	PAS-family sensor histidine kinase	CCNA_02967	[T] Signal transduction mechanisms	7.89986	8.639	1.02125	0.662847	0
CC_2632	CCNA_02715	MASE1-family sensor histidine kinase	CCNA_02715	[T] Signal transduction mechanisms	7.57608	5.85624	0.279264	0.0139085	0
CC_3377	CCNA_03487	Hypothetical protein	CCNA_03487	Not classified	6.94613	10.7769	0.145993	2.78043	0
CC_1321	CCNA_01382	Long-chain-fatty-acid--CoA ligase	CCNA_01382	[I] Lipid transport and metabolism	7.85262	7.66248	3.06043	0.173444	0
CC_0021	CCNA_00021	Putative aerobic-type carbon monoxide dehydrogenase, large subunit coxL	CCNA_00021	[C] Energy production and conversion	7.9448	8.95522	1.71888	2.61297	0
CC_3287	CCNA_03396	Trypsin-like serine proteases, typically periplasmic, contain C-terminal PDZ domain	CCNA_03396	[R] General function prediction only	7.98654	10.1024	1.53877	2.90089	0
CC_3029	CCNA_03124	NAD/MYCOTHIOL-DEPENDENT FORMALDEHYDE DEHYDROGENASE	CCNA_03124	[C] Energy production and conversion	7.18215	5.18796	0.40182	0.0454177	0
CC_1323	CCNA_01384	Amidase family protein	CCNA_01384	[J] Translation	6.83614	10.4951	1.56817	2.99763	0
CC_0428	CCNA_00437	Methyl-accepting chemotaxis protein	mcpB	[N] Cell motility	7.09967	5.82616	3.48886	0.0926655	1
CC_0247	CCNA_00247	Two-component receiver protein	CCNA_00247	[K] Transcription	6.97215	7.38522	0.315649	0.499574	0
CC_2795	CCNA_02885	Isochorismatase family protein	CCNA_02885	[Q] Secondary metabolites biosynthesis	6.36362	7.3158	0.387548	0.291118	0
CC_3597	CCNA_03711	Ribosome-associated factor Y	CCNA_03711	[J] Translation	7.10748	8.89824	0.122093	1.79667	0
CC_2531	CCNA_02614	Fumarylacetoacetase	CCNA_02614	[Q] Secondary metabolites biosynthesis	7.1356	7.73664	1.23049	0.897956	0
CC_0446	CCNA_00455	N-acetyl-glucosamine/N-acetyl-chitin oligosaccharide outer membrane transporter nagA	nagA	[P] Inorganic ion transport and metabolism	7.28269	5.62166	3.76582	1.33221	0
CC_0398	CCNA_00403	Short chain dehydrogenase	CCNA_00403	[I] Lipid transport and metabolism	7.13947	9.42575	2.17861	0.535499	0
CC_0966	CCNA_01017	AMP-(fatty)acid ligases	CCNA_01017	[I] Lipid transport and metabolism	7.10183	7.91819	0.390884	0.387854	0
CC_3240	CCNA_03348	Hypothetical protein	CCNA_03348	Not classified	7.09639	9.38883	1.83842	1.16127	0
CC_0081	CCNA_00079	Transcriptional regulator, MerR family	CCNA_00079	[K] Transcription	6.76919	6.91649	0.802021	1.34393	0
CC_1041	CCNA_01093	Hypothetical protein	CCNA_01093	Not classified	6.82888	5.74889	0.782222	0.0334934	0
CC_2322	CCNA_02407	Hypothetical protein	CCNA_02407	Not classified	6.43383	8.48852	0.721274	1.36925	0
CC_1172	CCNA_01230	Sulfatase family protein	CCNA_01230	[P] Inorganic ion transport and metabolism	6.69779	8.01608	0.967572	0.130641	0
CC_2414	CCNA_02496	Hypothetical protein	CCNA_02496	[S] Function unknown	5.81115	6.05834	1.35275	2.55281	1
CC_1469	CCNA_01536	Hypothetical protein	CCNA_01536	Not classified	6.85861	8.80975	0.212896	1.26898	0
CC_3455	CCNA_03568	LemA protein	CCNA_03568	[S] Function unknown	6.10933	7.13205	0.553972	0.267916	0
CC_3137	CCNA_03239	Spermidine/putrescine-binding protein	CCNA_03239	[E] Amino acid transport and metabolism	6.36564	15.4091	0.265209	2.39414	0
CC_2884	CCNA_02978	Two-component sensor histidine kinase	CCNA_02978	[T] Signal transduction mechanisms	6.20467	8.05889	0.365765	1.67185	0
CC_0690	CCNA_00726	Acyl-CoA dehydrogenase	CCNA_00726	[I] Lipid transport and metabolism	6.38807	5.32918	0.299072	2.15503	0
CC_0096	CCNA_00095	Quinone oxidoreductase	CCNA_00095	[C] Energy production and conversion	6.13363	6.27008	0.0439003	0.543572	0
CC_3141	CCNA_03243	Aldehyde dehydrogenase	CCNA_03243	[C] Energy production and conversion	6.77186	6.34444	0.747803	0.334023	0
CC_2327	CCNA_02412	TonB protein	CCNA_02412	Not classified	6.26116	47.8935	1.66965	6.05037	0
CC_2804	CCNA_02895	TonB-dependent receptor	CCNA_02895	[P] Inorganic ion transport and metabolism	6.34316	5.94174	1.4399	1.65473	1
CC_0777	CCNA_00817	L-sorbosone dehydrogenase [FAD]	CCNA_00817	[G] Carbohydrate transport and metabolism	6.32858	8.54474	0.944105	0.722959	0
CC_1396	CCNA_01462	Lactate 2-monooxygenase	CCNA_01462	[C] Energy production and conversion	5.94068	6.95602	1.0583	0.154399	1
CC_3096	CCNA_03193	Lactoylglutathione lyase	CCNA_03193	[E] Amino acid transport and metabolism	5.98576	6.0886	0.214006	0.641074	0
CC_0022	CCNA_00022	Putative aerobic-type carbon monoxide dehydrogenase, small subunit coxS	CCNA_00022	[C] Energy production and conversion	6.35773	7.62219	0.468619	0.620937	0
CC_0942	CCNA_00991	Nodulation protein N	CCNA_00991	[I] Lipid transport and metabolism	5.99849	5.2365	0.0879908	1.16596	0
CC_0774	CCNA_00813	Dimethylaniline monooxygenase [N-oxide forming]	CCNA_00813	[P] Inorganic ion transport and metabolism	6.15644	6.11466	0.995806	0.26133	0
CC_1891	CCNA_01968	Hypothetical protein with pentapeptide repeats	CCNA_01968	[S] Function unknown	5.82545	7.96057	0.104903	0.772757	0
CC_1748	CCNA_01822	Melibiose carrier protein	CCNA_01822	[G] Carbohydrate transport and metabolism	5.8533	8.39574	0.725418	0.0864095	0
CC_1216	CCNA_01274	piperideine-6-carboxylate dehydrogenase	CCNA_01274	[C] Energy production and conversion	5.84673	4.82626	0.572984	0.393672	0
CC_0167	CCNA_00166	Hypothetical protein	CCNA_00166	[S] Function unknown	5.98501	6.21479	0.758578	1.28364	1
CC_2796	CCNA_02886	Translation initiation inhibitor	CCNA_02886	[J] Translation	6.02837	6.00185	0.826581	0.687527	0
CC_3265	CCNA_03374	Hypothetical protein	CCNA_03374	Not classified	5.84437	7.42538	0.0408613	0.0538664	0
CC_3294	CCNA_03403	Hypothetical protein	CCNA_03403	[S] Function unknown	5.91423	7.44376	0.0400278	0.973938	0
CC_3375	CCNA_03485	Membrane protease family, stomatin/prohibitin homologs	CCNA_03485	[O] Posttranslational modification	5.99977	6.36393	1.64556	0.49896	0
CC_1634	CCNA_01706	dehydrogluconate dehydrogenase	CCNA_01706	[E] Amino acid transport and metabolism	6.29847	9.58644	1.53445	0.11384	0
CC_1229	CCNA_01287	Epoxide hydrolase	CCNA_01287	[R] General function prediction only	5.8407	5.93424	1.13663	1.09091	0
CC_2165	CCNA_02246	division plane positioning ATPase mipZ	mipZ	[D] Cell cycle control	6.058	9.21423	0.144361	1.89894	1
CC_1649	CCNA_01721	RNA polymerase sigma-E factor	CCNA_01721	[K] Transcription	5.86271	9.65081	0.134742	3.00601	0
CC_2128	CCNA_02212	ANTIBIOTIC-INDUCED PROTEIN, Drp35	CCNA_02212	[G] Carbohydrate transport and metabolism	6.13165	6.13472	1.31649	0.635107	0
CC_1039	CCNA_01091	Peptide methionine sulfoxide reductase	CCNA_01091	[O] Posttranslational modification	5.97768	6.19541	0.354243	1.27343	1
CC_0736	CCNA_00773	Carboxypeptidase S	CCNA_00773	[E] Amino acid transport and metabolism	5.80327	4.91104	1.09164	0.00461323	0
CC_3336	CCNA_03444	TonB-dependent receptor	CCNA_03444	[P] Inorganic ion transport and metabolism	5.74529	7.97943	1.06773	0.548416	1
CC_1633	CCNA_01705	Conserved hypothetical protein (1080)	CCNA_01705	Not classified	5.5115	6.71524	0.778207	2.00252	0
CC_3579	CCNA_03694	Transcriptional regulator	CCNA_03694	[K] Transcription	5.67494	7.24226	0.3388	0.491689	0
CC_2132	CCNA_02216	ABM family monooxygenase	CCNA_02216	[S] Function unknown	5.69474	6.95105	0.0868077	0.810407	0
CC_2831	CCNA_02922	hypothetical protein	CCNA_02922	Not classified	5.45238	4.243	0.920827	0.0965374	0
CC_1722	CCNA_01793	Hypothetical protein	CCNA_01793	Not classified	5.2108	10.1103	0.208793	1.43128	0
CC_2990	CCNA_03085	Nitropropane dioxygenase / Trans-enoyl-CoA reductase family	CCNA_03085	[R] General function prediction only	5.54315	6.45337	0.296606	1.68358	0
CC_3460	CCNA_03573	D-aminoacylase	CCNA_03573	[Q] Secondary metabolites biosynthesis	5.55219	7.07715	0.339253	0.870571	0
CC_3660	CCNA_03775	Conserved hypothetical protein	CCNA_03775	[S] Function unknown	5.55405	7.96363	0.325178	0.304173	0
CC_0386	CCNA_00390	ADP-heptose--LPS heptosyltransferase	CCNA_00390	[M] Cell wall/membrane/envelope biogenesis	5.37472	6.19486	0.768301	0.76832	1
CC_3143	CCNA_03245	Omega-amino acid--pyruvate aminotransferase	CCNA_03245	[H] Coenzyme transport and metabolism	6.08367	5.39435	1.11612	0.16334	0
CC_1363	CCNA_01425	H+ translocating pyrophosphatase	CCNA_01425	[C] Energy production and conversion	5.26897	9.44616	0.966487	0.0118654	1
CC_2435	CCNA_02517	Conserved hypothetical protein	CCNA_02517	[S] Function unknown	5.28267	6.00057	0.606071	0.731813	0
CC_3419	CCNA_03532	Transporter	CCNA_03532	Not classified	5.41511	5.99853	1.31528	1.51561	0
CC_0517	CCNA_00551	Hypothetical protein	CCNA_00551	Not classified	5.3708	5.14664	1.23745	0.42299	0
CC_0521	CCNA_00555	Nitrogen regulatory protein P-II	CCNA_00555	[E] Amino acid transport and metabolism	5.1378	5.59618	0.525879	0.909594	0
CC_0248	CCNA_00248	Sensor histidine protein kinase	CCNA_00248	[T] Signal transduction mechanisms	5.44183	6.36284	1.4426	0.430168	0
CC_3489	CCNA_03603	Beta-lactamase family protein	CCNA_03603	[V] Defense mechanisms	5.22979	5.61671	0.346264	0.833034	0
CC_0717	CCNA_00754	Hypothetical membrane associated protein	CCNA_00754	[S] Function unknown	2.04458	5.30903	0.126256	1.8853	0
CC_1219	CCNA_01277	D-sorbitol oxidase	CCNA_01277	[C] Energy production and conversion	5.46064	7.02839	1.87522	0.75992	0
CC_0746	CCNA_00783	Secreted protease precursor sapA	sapA	Not classified	5.25465	4.95587	0.385895	1.04701	0
CC_0550	CCNA_00585	Hypothetical protein	CCNA_00585	Not classified	5.16532	8.9576	1.21719	2.54658	0
CC_0400	CCNA_00405	Short chain dehydrogenase	CCNA_00405	[I] Lipid transport and metabolism	5.16728	6.41544	0.904417	0.493629	0
CC_1310	CCNA_01368	Acyl-CoA dehydrogenase	CCNA_01368	[I] Lipid transport and metabolism	5.03071	6.44081	0.211386	0.297662	0
CC_1056	CCNA_01109	Hypothetical cytosolic protein	CCNA_01109	[S] Function unknown	5.02598	6.33717	1.14221	1.12724	0
CC_1537	CCNA_01606	Chromosome partitioning protein parA	CCNA_01606	[D] Cell cycle control	4.5755	7.49272	0.967557	1.32926	0
CC_3139	CCNA_03241	Glutamate-1-semialdehyde 2,1-aminomutase	CCNA_03241	[H] Coenzyme transport and metabolism	5.12127	4.31004	1.67233	0.730725	0
CC_2136	CCNA_02220	Beta-glucosidase	CCNA_02220	[G] Carbohydrate transport and metabolism	4.98419	6.5771	0.211615	1.51154	0
CC_2672	CCNA_02754	Parathion hydrolase	CCNA_02754	[Q] Secondary metabolites biosynthesis	4.92703	6.62828	0.830652	1.11281	0
CC_3194	CCNA_03298	TonB-dependent outer membrane receptor	CCNA_03298	[P] Inorganic ion transport and metabolism	5.00819	7.18491	0.5662	0.0561604	0
CC_1348	CCNA_01410	Cyclohexanone monooxygenase	CCNA_01410	[P] Inorganic ion transport and metabolism	4.90678	6.09306	0.487448	0.411352	0
CC_0353	CCNA_00358	Delta3,5-delta2,4-dienoyl-CoA isomerase precursor	CCNA_00358	[I] Lipid transport and metabolism	4.97121	6.75288	0.813996	1.61887	0
CC_2912	CCNA_03006	Quinolinate synthetase A	CCNA_03006	[H] Coenzyme transport and metabolism	4.97288	5.02918	1.10485	0.775606	0
CC_3001	CCNA_03096	TonB-dependent receptor	CCNA_03096	[P] Inorganic ion transport and metabolism	4.87048	4.78898	3.4524	2.33914	0
CC_2914	CCNA_03008	Putative PD-(D/E)xK nuclease family protein	CCNA_03008	[S] Function unknown	4.81202	5.83464	0.564856	0.603854	0
CC_3076	CCNA_03172	3-oxoacyl-[acyl-carrier protein] reductase	CCNA_03172	[I] Lipid transport and metabolism	4.76913	3.19855	0.607385	0.664462	0
CC_1532	CCNA_01601	Conserved hypothetical protein	CCNA_01601	[S] Function unknown	1.88148	4.72955	0.717568	0.363026	1
CC_1572	CCNA_01643	Arginine-tRNA-protein transferase	CCNA_01643	[O] Posttranslational modification	4.68905	5.15239	0.627703	0.488496	0
CC_0696	CCNA_00732	GumN superfamily protein	CCNA_00732	Not classified	4.69002	4.68309	0.590199	0.492865	0
CC_2516	CCNA_02601	Glutathione-dependent formaldehyde dehydrogenase	CCNA_02601	[C] Energy production and conversion	4.58672	4.53295	0.473039	0.0976218	0
CC_2133	CCNA_02217	hypothetical protein	CCNA_02217	Not classified	4.75592	4.72919	0.387156	1.61052	1
CC_0284	CCNA_00286	Two-component receiver domain protein lovR	lovR	[K] Transcription	1.70487	4.49588	0.384563	0.429978	0
CC_1568	CCNA_01639	Beta-lactamase family protein	CCNA_01639	[V] Defense mechanisms	4.52599	5.02949	0.563406	0.404485	0
CC_2861	CCNA_02954	11-cis retinol dehydrogenase	CCNA_02954	[R] General function prediction only	4.61616	5.22346	0.525191	0.0956346	0
CC_2030	CCNA_02110	hypothetical protein	CCNA_02110	Not classified	4.7057	4.83051	0.0230488	0.621754	0
CC_2603	CCNA_02686	N-carbamoyl-L-amino acid hydrolase	CCNA_02686	[E] Amino acid transport and metabolism	5.00621	5.31672	0.105553	1.15673	0
CC_3191	CCNA_03295	PAS-family sensor histidine kinase	CCNA_03295	[K] Transcription	4.42029	4.21232	1.55842	1.09778	0
CC_2680	CCNA_02762	DNA repair protein radC	CCNA_02762	[L] Replication	4.5805	6.63763	0.08147	0.636904	0
CC_0944	CCNA_00993	Long-chain-fatty-acid--CoA ligase	CCNA_00993	[I] Lipid transport and metabolism	4.19345	5.33526	0.234611	0.34278	0
CC_0762	CCNA_00800	Cytochrome bd-type quinol oxidase, subunit 1 cydA	cydA	[C] Energy production and conversion	4.43033	4.39546	1.05386	0.1587	0
CC_1397	CCNA_01463	3-deoxy-7-phosphoheptulonate synthase	CCNA_01463	[E] Amino acid transport and metabolism	4.68098	12.0698	0.0905591	1.21275	0
CC_2670	CCNA_02752	GAF/PAS-family histidine kinase/receiver protein	CCNA_02752	[K] Transcription	4.3834	4.12525	1.1942	0.10544	0
CC_2883	CCNA_02977	RNA polymerase ECF-type sigma factor sigU	sigU	[K] Transcription	4.4804	9.57142	1.1456	1.08134	1
CC_2518	CCNA_02603	Phosphatidylserine decarboxylase	CCNA_02603	[S] Function unknown	4.18654	3.79228	0.196267	0.294339	0
CC_3127	CCNA_03227	TonB-dependent receptor	CCNA_03227	[P] Inorganic ion transport and metabolism	4.57316	4.51491	0.405389	0.233716	0
CC_0192	CCNA_00192	Long-chain-fatty-acid--CoA ligase	CCNA_00192	[I] Lipid transport and metabolism	4.47096	5.52914	1.17623	1.03543	0
CC_3454	CCNA_03567	Acyl-CoA dehydrogenase	CCNA_03567	[I] Lipid transport and metabolism	4.33673	3.69829	0.179761	0.565631	0
CC_1201	CCNA_01259	Class II Aldolase and Adducin proteins	CCNA_01259	[G] Carbohydrate transport and metabolism	4.3845	7.07031	0.679394	1.10749	0
CC_0425	CCNA_00434	Conserved membrane-spanning protein	CCNA_00434	[S] Function unknown	4.69547	6.11949	1.42636	0.0549069	0
CC_2050	CCNA_02129	Acyl-CoA dehydrogenase, short-chain specific	CCNA_02129	[I] Lipid transport and metabolism	4.53438	3.71374	0.00635528	0.451629	0
CC_3220	CCNA_03327	Hypothetical protein	CCNA_03327	Not classified	4.32183	6.05274	1.49244	2.27658	0
CC_2415	CCNA_02497	Hypothetical protein	CCNA_02497	[S] Function unknown	4.14413	4.19993	0.501639	0.556442	1
CC_2997	CCNA_03092	CYTOCHROME P450 IVA5	CCNA_03092	[Q] Secondary metabolites biosynthesis	4.08343	6.35204	0.0680711	0.178306	0
CC_0789	CCNA_00831	Alpha-glucosidase	CCNA_00831	[G] Carbohydrate transport and metabolism	4.41437	4.03159	1.16836	0.413417	0
CC_3025	CCNA_03120	Chemotaxis protein cheW	CCNA_03120	[N] Cell motility	4.36409	4.49157	0.750101	1.1438	1
CC_2619	CCNA_02702	Xanthine dehydrogenase small subunit	CCNA_02702	[F] Nucleotide transport and metabolism	4.83359	5.34138	0.573919	1.02907	0
CC_3135	CCNA_03236	Spermidine/putrescine transport system permease protein potC	CCNA_03236	[E] Amino acid transport and metabolism	1.37612	4.28763	0.0540402	0.662406	0
CC_3356	CCNA_03466	Hypothetical cytosolic protein	CCNA_03466	Not classified	4.14859	3.18521	0.914468	0.223352	0
CC_3631	CCNA_03746	Acetylornithine deacetylase	CCNA_03746	[E] Amino acid transport and metabolism	4.20309	4.86237	1.11047	0.0440863	0
CC_0080	CCNA_00078	Acyl-CoA dehydrogenase	CCNA_00078	[I] Lipid transport and metabolism	4.25671	4.30349	0.72982	0.870066	0
CC_3298	CCNA_03407	Sodium export permease protein	CCNA_03407	[C] Energy production and conversion	4.25065	4.81828	0.380048	0.386818	0
CC_0280	CCNA_00282	Conserved cell surface protein	CCNA_00282	Not classified	4.46043	10.6427	2.28787	2.44794	1
CC_1444	CCNA_01511	Sterol desaturase family protein	CCNA_01511	[I] Lipid transport and metabolism	4.23317	4.70906	0.197619	0.173301	0
CC_1569	CCNA_01640	Quinone oxidoreductase	CCNA_01640	[C] Energy production and conversion	4.31175	2.37788	0.620259	0.1505	0
CC_3441	CCNA_03554	Esterase Lipase Family Protein	CCNA_03554	[I] Lipid transport and metabolism	4.53136	5.70883	1.02208	0.758727	0
CC_3134	CCNA_03235	Spermidine/putrescine transport ATP-binding protein potA	CCNA_03235	[E] Amino acid transport and metabolism	1.20652	4.28305	0.137179	0.501072	0
CC_1849	CCNA_01925	Coniferyl aldehyde dehydrogenase	CCNA_01925	[C] Energy production and conversion	4.30178	5.37974	1.14768	1.06151	0
CC_0341	CCNA_00345	IroE protein	CCNA_00345	[R] General function prediction only	4.25823	4.52544	0.343167	0.0786963	1
CC_3619	CCNA_03734	Glutamine-dependent NAD(+) synthetase	CCNA_03734	[H] Coenzyme transport and metabolism	3.98762	4.75616	0.243111	0.59552	1
CC_2131	CCNA_02215	Acyl-CoA dehydrogenase	CCNA_02215	[I] Lipid transport and metabolism	3.96222	6.19994	0.522155	0.900646	0
CC_2294	CCNA_02378	Hypothetical protein	CCNA_02378	[S] Function unknown	4.01962	5.58123	1.04818	0.707389	0
CC_0390	CCNA_00394	Hypothetical cytosolic protein	CCNA_00394	[S] Function unknown	4.15479	4.87405	0.344177	0.566079	0
CC_3410	CCNA_03521	Hypothetical membrane associated protein	CCNA_03521	Not classified	3.98781	3.93289	0.743784	0.289549	0
CC_0285	CCNA_00287	Photosensory histidine protein kinase lovK	lovK	[T] Signal transduction mechanisms	1.54784	4.04793	0.303096	0.179284	1
CC_2016	CCNA_02095	Putative NADP-dependent oxidoreductase	CCNA_02095	[R] General function prediction only	3.88701	3.16373	0.127952	1.03286	0
CC_3048	CCNA_03143	PAS-family sensor histidine kinase	CCNA_03143	[T] Signal transduction mechanisms	4.16174	3.81874	1.11883	0.353017	0
CC_1959	CCNA_02036	DNA-binding protein HU	hu1	[L] Replication	4.08593	4.33551	0.375435	0.621809	0
CC_1646	CCNA_01718	Extracytoplasmic function alternative sigma factor	CCNA_01718	[K] Transcription	1.31792	4.08421	0.199162	0.22941	0
CC_1401	CCNA_01467	Cytochrome cbb3 oxidase subunit I ccoN	ccoN	[O] Posttranslational modification	4.20558	1.33406	4.36816	0.416774	0
CC_1696	CCNA_01767	Cytochrome C family protein	CCNA_01767	[C] Energy production and conversion	1.73179	4.22317	0.0373251	0.728486	0
CC_2569	CCNA_02652	Cyclohexanone monooxygenase	CCNA_02652	[P] Inorganic ion transport and metabolism	3.93702	4.69457	0.886289	0.0718664	0
CC_0972	CCNA_01023	Tryptophan halogenase	CCNA_01023	Not classified	4.05757	5.09082	0.726881	0.0337925	0
CC_1570	CCNA_01641	2-Nitropropane dioxygenase family protein	CCNA_01641	[R] General function prediction only	3.83355	3.3805	0.39115	0.594264	0
CC_3663	CCNA_03778	Integral membrane protein	CCNA_03778	[R] General function prediction only	4.01931	4.83241	0.0587771	1.73573	0
CC_0782	CCNA_00823	Hypothetical protein	CCNA_00823	[K] Transcription	4.05874	4.55646	0.265223	0.0824956	1
CC_0772	CCNA_00811	Transcriptional regulator, TetR family	CCNA_00811	[K] Transcription	3.55243	3.20641	0.360393	0.633536	1
CC_2801	CCNA_02891	Beta-galactosidase	CCNA_02891	[G] Carbohydrate transport and metabolism	4.09038	4.96121	0.034035	0.665021	0
CC_2597	CCNA_02680	Conserved transmembrane protein	CCNA_02680	Not classified	3.40687	4.36751	0.241907	1.30965	0
CC_2026	CCNA_02105	Conserved hypothetical protein	CCNA_02105	Not classified	3.69957	4.05009	0.220855	0.60797	0
CC_0763	CCNA_00801	Cytochrome bd-type quinol oxidase, subunit 2 cydB	cydB	[C] Energy production and conversion	3.88647	3.46087	2.14751	0.618717	0
CC_0262	CCNA_00263	Hypothetical protein	CCNA_00263	Not classified	3.61588	4.32248	0.0168531	0.449425	0
CC_0419	CCNA_00424	Aldehyde dehydrogenase	CCNA_00424	[C] Energy production and conversion	3.81073	5.13816	0.468105	0.552019	0
CC_1335	CCNA_01396	Tetratricopeptide repeat family protein	CCNA_01396	[R] General function prediction only	3.69649	4.11394	0.426367	0.238932	0
CC_2100	CCNA_02185	Acetolactate synthase large subunit	CCNA_02185	[E] Amino acid transport and metabolism	3.82295	3.43858	0.0787107	0.2827	0
CC_1612	CCNA_01684	Phenylalanine-4-hydroxylase	CCNA_01684	[E] Amino acid transport and metabolism	4.10436	5.9781	0.736919	0.446907	0
CC_2066	CCNA_02145	Flagellar L-ring protein flgH	flgH	[N] Cell motility	3.8425	0.996796	0.317838	0.217159	1
CC_0038	CCNA_00037	Esterase Lipase Family Protein	CCNA_00037	[Q] Secondary metabolites biosynthesis	3.7453	4.82257	0.775348	0.479638	0
CC_0589	CCNA_00626	Methyl-accepting chemotaxis protein	CCNA_00626	[N] Cell motility	3.702	2.85743	0.521242	0.0113382	0
CC_0852	CCNA_00895	Conserved hypothetical protein	CCNA_00895	Not classified	3.79605	3.31606	0.415025	0.104135	0
CC_3466	CCNA_03579	Hypothetical protein	CCNA_03579	Not classified	3.72344	7.43393	1.63402	1.01418	1
CC_3031	CCNA_03126	Non-hemolytic phospholipase C	CCNA_03126	[M] Cell wall/membrane/envelope biogenesis	3.79516	3.46624	0.598649	0.965303	0
CC_2549	CCNA_02632	Putative heme-binding protein	CCNA_02632	Not classified	4.01635	10.9346	0.188002	1.10906	0
CC_1227	CCNA_01285	Proline iminopeptidase	CCNA_01285	[R] General function prediction only	3.80725	3.89418	1.11582	0.788569	0
CC_1418	CCNA_01485	Aldose 1-epimerase	CCNA_01485	[G] Carbohydrate transport and metabolism	3.75391	3.09396	0.497869	0.588475	0
CC_2832	CCNA_02923	TonB-dependent receptor	CCNA_02923	[P] Inorganic ion transport and metabolism	3.47672	2.67211	0.492331	0.0716406	0
CC_0816	CCNA_00859	acetyltransferase, GNAT family	CCNA_00859	Not classified	3.94867	6.83001	1.54608	0.864841	1
CC_0971	CCNA_01022	Tryptophan halogenase	CCNA_01022	Not classified	3.75577	3.45848	0.987185	0.295436	0
CC_3731	CCNA_03847	Endonuclease III	CCNA_03847	[L] Replication	3.84927	4.1057	0.84095	0.308942	1
CC_0336	CCNA_00339	Transporter	CCNA_00339	[G] Carbohydrate transport and metabolism	3.76146	6.11429	0.650703	1.2517	0
CC_3046	CCNA_03141	Phosphoserine phosphatase	CCNA_03141	[E] Amino acid transport and metabolism	3.7142	2.99057	0.496348	0.487151	0
CC_1586	CCNA_01657	Hypothetical protein	CCNA_01657	Not classified	3.59639	2.92898	0.254942	0.0760272	0
CC_0299	CCNA_00301	Phosphotransferase family protein	CCNA_00301	[R] General function prediction only	3.81589	4.07592	0.558549	0.0626768	0
CC_1431	CCNA_01498	DNA-dependent DNA polymerase III alpha chain	CCNA_01498	[I] Lipid transport and metabolism	3.66154	4.94064	0.564683	1.79209	0
CC_3702	CCNA_03816	Peptidyl-dipeptidase DCP	CCNA_03816	[E] Amino acid transport and metabolism	3.69853	3.73165	0.327827	0.0721928	0
CC_0424	CCNA_00432	Transcriptional regulator, AsnC family	CCNA_00432	[K] Transcription	3.85588	3.11368	0.0392659	0.0444671	0
CC_1364	CCNA_01426	Chemotaxis receiver domain protein cheYIII	CCNA_01426	[T] Signal transduction mechanisms	3.8107	3.39113	0.976678	0.094491	1
CC_3260	CCNA_03369	Hypothetical protein	CCNA_03369	Not classified	3.67082	6.8109	0.436818	0.890338	0
CC_0788	CCNA_00830	Beta-galactosidase	CCNA_00830	[G] Carbohydrate transport and metabolism	3.77861	3.79763	0.905628	0.243719	0
CC_2152	CCNA_02235	Putative secreted protein	CCNA_02235	[E] Amino acid transport and metabolism	3.64984	3.21281	0.217357	0.170377	0
CC_1473	CCNA_01540	Hypothetical protein	CCNA_01540	Not classified	3.5759	4.07647	0.0141646	0.0980351	0
CC_0077	CCNA_00075	3-ketoacyl-CoA thiolase	CCNA_00075	[I] Lipid transport and metabolism	3.71544	3.69832	1.20271	0.0111948	0
CC_0888	CCNA_00932	6,7-dimethyl-8-ribityllumazine synthase	ribH	[H] Coenzyme transport and metabolism	0.336691	3.58064	0.106908	0.568698	1
CC_0571	CCNA_00607	TonB-dependent receptor	CCNA_00607	[P] Inorganic ion transport and metabolism	3.8221	3.60393	2.15972	2.0382	0
CC_0200	CCNA_00200	2OG-Fe(II) oxygenase superfamily protein	CCNA_00200	[R] General function prediction only	3.57033	4.3179	0.01989	0.134371	0
CC_2645	CCNA_02728	hypothetical protein	CCNA_02728	Not classified	3.53467	3.87642	0.0237819	0.11994	1
CC_1695	CCNA_01766	Conserved hypothetical protein	CCNA_01766	[M] Cell wall/membrane/envelope biogenesis	3.57699	5.26136	0.0998166	1.28516	0
CC_3514	CCNA_03629	Hypothetical protein	CCNA_03629	Not classified	3.36732	3.79444	0.237093	0.955167	0
CC_0776	CCNA_00815	Lignostilbene-alpha,beta-dioxygenase	CCNA_00815	[Q] Secondary metabolites biosynthesis	3.62402	3.78402	0.0411546	0.0657155	1
CC_1327	CCNA_01388	Methyltransferase	CCNA_01388	[H] Coenzyme transport and metabolism	3.60964	3.57337	0.116843	0.608493	0
CC_0781	CCNA_00822	Hypothetical protein	CCNA_00822	Not classified	3.55217	4.05955	0.0248663	0.113817	1
CC_0921	CCNA_00969	Two component sensor histidine kinase	CCNA_00969	[T] Signal transduction mechanisms	3.38503	3.77753	1.10249	0.447662	0
CC_2966	CCNA_03061	3-oxoacyl-[acyl-carrier protein] reductase	CCNA_03061	[R] General function prediction only	3.45212	4.84735	0.0494199	0.363667	0
CC_1629	CCNA_01701	Xylose isomerase family protein	CCNA_01701	[G] Carbohydrate transport and metabolism	3.43247	3.30991	0.484619	0.569499	0
CC_1644	CCNA_01716	Hypothetical protein	CCNA_01716	Not classified	3.51081	7.76161	0.7367	0.726594	0
CC_3138	CCNA_03240	Glutamine synthetase	CCNA_03240	[E] Amino acid transport and metabolism	3.51877	2.77853	0.130512	0.532829	0
CC_2074	CCNA_02155	Hypothetical protein	CCNA_02155	[S] Function unknown	3.33008	3.9937	0.396553	0.79652	0
CC_2843	CCNA_02936	Glutathione S-transferase	CCNA_02936	[O] Posttranslational modification	3.48086	3.10233	0.436336	0.0396568	0
CC_3204	CCNA_03309	Homoserine O-acetyltransferase	CCNA_03309	[E] Amino acid transport and metabolism	3.5038	3.45092	0.104085	0.233433	0
CC_1325	CCNA_01386	Conserved hypothetical protein	CCNA_01386	Not classified	3.4431	4.07042	0.441834	0.253483	0
CC_2312	CCNA_02397	Transcriptional regulator, DeoR family	CCNA_02397	[K] Transcription	3.44741	3.10091	0.354052	0.178549	0
CC_1605	CCNA_01677	Carboxypeptidase G2 precursor	CCNA_01677	[E] Amino acid transport and metabolism	3.3677	3.39303	0.455785	0.309832	0
CC_1635	CCNA_01707	Conserved hypothetical protein	CCNA_01707	Not classified	3.42507	3.51759	1.43094	0.600927	0
CC_1571	CCNA_01642	Gluconate 5-dehydrogenase	CCNA_01642	[I] Lipid transport and metabolism	3.37854	3.86496	0.194332	0.119431	0
CC_3178	CCNA_03282	Pirin	CCNA_03282	[R] General function prediction only	3.44223	3.54722	0.088393	0.0730435	0
CC_3349	CCNA_03459	Methyl-accepting chemotaxis protein	CCNA_03459	[N] Cell motility	3.57259	4.29547	0.899358	0.0743221	1
CC_3435	CCNA_03548	Carboxy-terminal processing protease precursor	CCNA_03548	[M] Cell wall/membrane/envelope biogenesis	3.26687	3.67102	0.204405	0.18169	0
CC_1072	CCNA_01125	Ribonuclease H	CCNA_01125	Not classified	3.35059	3.97978	0.046225	0.570946	1
CC_1088	CCNA_01142	Hypothetical protein	CCNA_01142	Not classified	3.63474	3.03048	0.75868	0.285829	0
CC_0779	CCNA_00820	3-ketoacyl-CoA thiolase	CCNA_00820	[I] Lipid transport and metabolism	3.5666	3.82459	0.540241	0.314799	1
CC_3411	CCNA_03522	Microcin-processing peptidase 2 (TldD)	CCNA_03522	[R] General function prediction only	3.41228	3.43028	0.457227	0.22169	0
CC_3533	CCNA_03647	Probable sulfolipid biosynthesis protein sqdA	CCNA_03647	[R] General function prediction only	3.34225	5.41177	0.364231	0.482158	0
CC_2448	CCNA_02530	SAM-dependent methyltransferase	CCNA_02530	[R] General function prediction only	3.06313	3.93045	0.284958	0.183679	0
CC_1040	CCNA_01092	Hypothetical protein	CCNA_01092	Not classified	3.3349	3.48822	0.311137	0.369192	0
CC_1194	CCNA_01252	Soluble lytic murein transglycosylase	CCNA_01252	[M] Cell wall/membrane/envelope biogenesis	3.3285	3.75486	0.356209	0.0527322	0
CC_1223	CCNA_01281	Glycerol kinase	CCNA_01281	[C] Energy production and conversion	3.346	4.74069	0.441682	0.44932	0
CC_0991	CCNA_01042	TonB-dependent receptor	CCNA_01042	[P] Inorganic ion transport and metabolism	3.37854	5.01409	0.51805	0.042303	1
CC_2879	CCNA_02973	antitoxin protein relB-3	relB-3	Not classified	3.22448	4.3776	0.290122	0.547175	1
CC_2479	CCNA_02564	Acyl-CoA dehydrogenase, short-chain specific	CCNA_02564	[I] Lipid transport and metabolism	3.25635	4.15002	0.365622	0.893703	0
CC_0168	CCNA_00167	Bis(5'-nucleosyl)-tetraphosphatase (symmetrical)	CCNA_00167	Not classified	3.3361	3.63409	0.0298647	1.12109	0
CC_0427	CCNA_00436	Acyl-CoA dehydrogenase, short-chain specific	CCNA_00436	[I] Lipid transport and metabolism	3.37236	2.82038	0.180221	0.373419	0
CC_2835	CCNA_02926	hypothetical protein	CCNA_02926	Not classified	3.4784	4.16962	0.527926	0.201333	0
CC_2589	CCNA_02672	hypothetical protein	CCNA_02672	Not classified	3.25357	4.00012	0.0627984	1.37104	0
CC_0094	CCNA_00092	Short chain dehydrogenase	CCNA_00092	[I] Lipid transport and metabolism	3.28383	3.24878	0.583514	0.180671	0
CC_2853	CCNA_02946	spsF-related cytidylyltransferase	CCNA_02946	[M] Cell wall/membrane/envelope biogenesis	3.09861	3.41859	0.508796	0.0464174	0
CC_2032	CCNA_02112	D-cysteine desulfhydrase	CCNA_02112	[E] Amino acid transport and metabolism	3.27495	3.71128	0.630416	0.330691	1
CC_2267	CCNA_02350	Dabb-family alpha/beta stress response protein	CCNA_02350	Not classified	3.30211	2.81635	0.353866	0.192757	0
CC_3555	CCNA_03670	Hypothetical diacylglycerol kinase catalytic region	CCNA_03670	[I] Lipid transport and metabolism	3.35375	3.49326	0.21553	1.07829	0
CC_3322	CCNA_03431	Membrane-bound lytic murein transglycosylase B	CCNA_03431	[M] Cell wall/membrane/envelope biogenesis	3.12739	3.38756	0.676289	0.79078	0
CC_1232	CCNA_01290	Hypothetical protein	CCNA_01290	Not classified	3.28929	1.98411	0.305168	0.23176	0
CC_0125	CCNA_00124	Conserved hypothetical protein	CCNA_00124	Not classified	3.22749	3.27554	0.330218	0.221193	0
CC_3170	CCNA_03272	Two-component sensor histidine kinase	CCNA_03272	[T] Signal transduction mechanisms	3.3012	5.01113	0.136115	0.217569	0
CC_1432	CCNA_01499	Acetyl-CoA acetyltransferase	CCNA_01499	[I] Lipid transport and metabolism	3.22912	2.95648	0.051529	0.424714	0
CC_2707	CCNA_02790	RNA polymerase ECF-type sigma factor	CCNA_02790	[K] Transcription	3.17172	4.99719	0.295227	0.752531	0
CC_0335	CCNA_00338	TonB-dependent receptor	CCNA_00338	[P] Inorganic ion transport and metabolism	3.41297	5.94579	1.10511	0.0807895	1
CC_3584	CCNA_03699	Peptidase, M16 family	CCNA_03699	[R] General function prediction only	3.33663	3.63668	0.947574	0.0528935	0
CC_3225	CCNA_03333	PAS-family sensor histidine kinase	CCNA_03333	[T] Signal transduction mechanisms	1.18031	3.18928	0.1727	0.662176	0
CC_0510	CCNA_00544	Acetyl-CoA acetyltransferase	CCNA_00544	[I] Lipid transport and metabolism	1.95714	3.25128	0.0885473	0.530362	0
CC_1565	CCNA_01636	Alkaline phosphatase	CCNA_01636	[P] Inorganic ion transport and metabolism	3.17628	3.36204	0.57755	0.222589	0
CC_2604	CCNA_02687	Serine--pyruvate aminotransferase	CCNA_02687	[E] Amino acid transport and metabolism	3.09225	3.20614	0.128964	0.345594	0
CC_0956	CCNA_01007	Hypothetical protein	CCNA_01007	Not classified	1.94656	3.14967	0.174442	0.435734	1
CC_2618	CCNA_02701	Xanthine dehydrogenase large subunit	CCNA_02701	[F] Nucleotide transport and metabolism	3.25914	3.3317	0.033947	0.695373	0
CC_3575	CCNA_03690	Spore coat polysaccharide biosynthesis protein spsF	CCNA_03690	[M] Cell wall/membrane/envelope biogenesis	3.08127	3.15547	0.0343913	0.655797	1
CC_0922	CCNA_00970	Long-chain-fatty-acid--CoA ligase	CCNA_00970	[I] Lipid transport and metabolism	3.22468	3.86744	0.655598	0.139564	0
CC_3580	CCNA_03695	Aldehyde dehydrogenase	CCNA_03695	[C] Energy production and conversion	3.27715	5.00394	0.750254	1.24527	0
CC_0678	CCNA_00716	Hypothetical protein	CCNA_00716	Not classified	3.03871	3.12288	0.172559	0.102336	0
CC_2122	CCNA_02206	Conserved hypothetical protein	CCNA_02206	[S] Function unknown	3.1851	3.06967	0.1999	0.207611	1
CC_0148	CCNA_00147	Hypothetical protein	CCNA_00147	Not classified	3.18638	2.95795	0.093068	0.0146505	0
CC_3003	CCNA_03098	Conserved hypothetical protein	CCNA_03098	Not classified	2.89428	4.30665	0.00452132	0.234366	0
CC_2753	CCNA_02839	Glutamate-ammonia-ligase adenylyltransferase	CCNA_02839	[O] Posttranslational modification	3.01242	2.71967	0.255444	0.104176	0
CC_1403	CCNA_01469	Cytochrome cbb3 oxidase, subunit ccoQ	ccoQ	[O] Posttranslational modification	3.25978	1.13508	2.85335	0.268829	0
CC_3395	CCNA_03506	Transcriptional regulator, algH	CCNA_03506	[K] Transcription	3.10021	2.98178	0.466118	0.265453	1
CC_2357	CCNA_02442	Beta-xylosidase	CCNA_02442	[G] Carbohydrate transport and metabolism	3.02867	3.11874	0.388318	0.15264	0
CC_3479	CCNA_03593	Integral membrane protein	CC_3479	Not classified	3.2305	3.43718	0.531946	0.569679	0
CC_2965	CCNA_03060	Conserved hypothetical protein	CCNA_03060	[S] Function unknown	3.09299	3.92357	0.0118415	0.178209	0
CC_1067	CCNA_01120	Hypothetical protein	CCNA_01120	Not classified	2.98634	3.03169	0.124845	0.12271	0
CC_2579	CCNA_02662	Aminopeptidase	CCNA_02662	[R] General function prediction only	2.96757	2.93224	0.542679	0.293015	0
CC_2612	CCNA_02695	hypothetical protein	CCNA_02695	Not classified	3.03445	2.84124	0.38739	0.491585	0
CC_0927	CCNA_00976	Signal peptide peptidase sppA	sppA	[O] Posttranslational modification	3.12605	4.35406	0.336102	0.140694	0
CC_3262	CCNA_03371	Bacterioferritin	CCNA_03371	[P] Inorganic ion transport and metabolism	3.02502	3.42651	0.0886154	0.410731	0
CC_2913	CCNA_03007	L-aspartate oxidase	CCNA_03007	[H] Coenzyme transport and metabolism	3.24341	3.76747	0.244135	0.0356712	0
CC_3338	CCNA_03446	Feruloyl-CoA synthetase	CCNA_03446	[I] Lipid transport and metabolism	3.00779	3.5092	0.499201	0.835254	0
CC_1054	CCNA_01106	antitoxin protein parD-2	parD-2	[K] Transcription	3.18221	3.86698	0.774508	0.42641	0
CC_3473	CCNA_03587	Entericidin B homolog	CCNA_03587	Not classified	1.44323	3.09145	0.41688	0.565161	0
CC_1380	CCNA_01444	Poly(3-hydroxyalkanoate) polymerase	CCNA_01444	[I] Lipid transport and metabolism	2.88812	4.54233	0.482503	0.318233	1
CC_1851	CCNA_01927	Enoyl-CoA hydratase	CCNA_01927	[I] Lipid transport and metabolism	3.03256	3.38446	0.84092	0.208603	0
CC_1137	CCNA_01195	Transcriptional regulator, LacI family	CCNA_01195	[K] Transcription	2.92482	3.39161	0.00636922	0.0130706	0
CC_1307	CCNA_01365	Aspartyl protease perP	perP	[R] General function prediction only	3.1537	2.99139	0.369821	0.409863	1
CC_1024	CCNA_01076	Beta/Gamma crystallin domain protein	CCNA_01076	Not classified	2.98903	4.15075	0.612066	1.37191	0
CC_2416	CCNA_02498	YjbJ-related lytic transglycosylase	CCNA_02498	[M] Cell wall/membrane/envelope biogenesis	3.05779	3.88174	0.680979	0.987483	0
CC_1606	CCNA_01678	Arginine N-succinyltransferase, beta chain	CCNA_01678	[E] Amino acid transport and metabolism	2.99085	2.60883	0.0831656	0.0777873	0
CC_0724	CCNA_00761	Hypothetical protein	CCNA_00761	Not classified	2.94619	3.42397	0.238989	0.29811	0
CC_2643	CCNA_02726	Putative acetyltransferase/acyltransferase	CCNA_02726	[R] General function prediction only	2.93583	2.36719	0.207175	0.469388	0
CC_2049	CCNA_02128	Acyl-CoA dehydrogenase	CCNA_02128	[I] Lipid transport and metabolism	3.03903	3.45039	0.383618	0.0244872	0
CC_0673	CCNA_00709	Hypothetical protein	CCNA_00709	Not classified	2.97676	10.0403	1.57368	3.35364	0
CC_3374	CCNA_03484	Hypothetical protein	CCNA_03484	[O] Posttranslational modification	3.0108	3.48752	0.811247	0.558927	0
CC_3142	CCNA_03244	Transcriptional regulator	CCNA_03244	[K] Transcription	3.10038	2.35476	0.799864	0.266619	0
CC_1988	CCNA_02067	Conserved membrane spanning protein	CCNA_02067	[S] Function unknown	3.01875	4.35637	0.399391	0.0265697	0
CC_1304	CCNA_01362	Alkaline phosphatase synthesis two-component response regulator phoP	phoP	[K] Transcription	1.6942	2.98396	0.142969	0.246472	1
CC_2886	CCNA_02980	Tryptophan 2,3-dioxygenase	CCNA_02980	[E] Amino acid transport and metabolism	3.0777	4.12096	0.246453	0.359293	0
CC_3187	CCNA_03291	Conserved hypothetical protein	CCNA_03291	[M] Cell wall/membrane/envelope biogenesis	2.97998	2.77498	0.173028	0.0794498	0
CC_1986	CCNA_02065	Acylamino-acid-releasing enzyme	CCNA_02065	[E] Amino acid transport and metabolism	3.04661	3.03265	0.127126	0.0146234	0
CC_0570	CCNA_00605	Conserved hypothetical membrane protein	CCNA_00605	Not classified	3.10267	3.85354	0.212319	0.247365	0
CC_3193	CCNA_03297	Conserved hypothetical protein	CCNA_03297	Not classified	3.0879	2.61681	0.568572	0.116429	0
CC_2496	CCNA_02581	Hypothetical protein	CCNA_02581	Not classified	2.76321	2.99981	0.0177226	0.876777	0
CC_2778	CCNA_02866	Conserved membrane protein	CCNA_02866	[S] Function unknown	2.96299	2.89569	0.27144	0.506113	0
CC_3711	CCNA_03826	Conserved hypothetical protein	CCNA_03826	[R] General function prediction only	2.93598	3.35734	0.0285714	0.467244	0
CC_3308	CCNA_03417	Hydrolase	CCNA_03417	[R] General function prediction only	1.89095	2.97008	0.0488783	0.215784	0
CC_2676	CCNA_02758	hypothetical protein	CCNA_02758	Not classified	2.91405	2.52947	0.214387	0.0492721	0
CC_2155	CCNA_02238	hypothetical protein	CCNA_02238	Not classified	2.82896	2.98164	0.948361	0.488761	0
CC_1303	CCNA_01361	Hypothetical protein	CCNA_01361	[S] Function unknown	2.9707	4.36138	0.207504	0.309267	0
CC_1042	CCNA_01094	Hypothetical protein	CCNA_01094	Not classified	2.56149	2.51973	0.455698	0.00527907	0
CC_1085	CCNA_01139	Hypothetical cytosolic protein	CCNA_01139	[S] Function unknown	2.9518	3.62099	0.381252	0.553127	0
CC_0960	CCNA_01011	Imidazolonepropionase	CCNA_01011	[Q] Secondary metabolites biosynthesis	1.86552	2.91253	0.0835249	0.141149	0
CC_1332	CCNA_01393	Soluble lytic murein transglycosylase	CCNA_01393	[M] Cell wall/membrane/envelope biogenesis	1.88682	2.87928	0.109041	0.0573989	0
CC_2536	CCNA_02619	stomatin/prohibitin-related protein	CCNA_02619	[O] Posttranslational modification	2.88608	2.43385	0.199446	0.63734	0
CC_2633	CCNA_02716	ABC transporter substrate-binding protein	CCNA_02716	[P] Inorganic ion transport and metabolism	2.95213	3.27297	0.263563	0.498731	0
CC_0089	CCNA_00087	Conserved membrane spanning protein	CCNA_00087	[R] General function prediction only	1.93279	2.90075	0.0692305	0.293631	0
CC_3560	CCNA_03675	PAS-family sensor histidine kinase	CCNA_03675	[T] Signal transduction mechanisms	2.73479	3.34435	0.0373069	0.223892	0
CC_3422	CCNA_03535	Fatty acid desaturase	CCNA_03535	[I] Lipid transport and metabolism	2.91051	3.10838	0.532374	0.285724	0
CC_2121	CCNA_02205	Conserved hypothetical protein	CC_2121	Not classified	2.83289	3.91045	0.366517	0.188833	0
CC_3701	CCNA_03815	GumN superfamily protein	CCNA_03815	[S] Function unknown	3.10095	3.04677	0.242198	0.132395	0
CC_2126	CCNA_02210	Dihydrofolate reductase	CCNA_02210	[H] Coenzyme transport and metabolism	2.90771	2.79468	0.985298	0.75487	0
CC_3456	CCNA_03569	Hypothetical membrane spanning protein	CCNA_03569	[R] General function prediction only	2.90595	3.39333	0.690859	0.415406	0
CC_3239	CCNA_03347	N-acyl-L-amino acid amidohydrolase	CCNA_03347	[E] Amino acid transport and metabolism	2.70823	3.87562	0.0718291	0.50008	0
CC_3015	CCNA_03110	Two-component receiver domain protein	CCNA_03110	[T] Signal transduction mechanisms	2.8861	4.62362	0.558174	0.0621017	1
CC_3391	CCNA_03502	YceI/cytochrome b561 periplasmic protein	CCNA_03502	[C] Energy production and conversion	2.87897	4.14031	0.526901	0.160364	0
CC_3389	CCNA_03500	FAD/FMN-containing dehydrogenases	CCNA_03500	[C] Energy production and conversion	1.99747	3.07108	0.291432	1.07684	0
CC_0658	CCNA_00695	Metal-dependent hydrolase	CCNA_00695	[R] General function prediction only	2.76745	3.03358	0.0220073	0.683147	0
CC_1445	CCNA_01512	Hypothetical protein	CCNA_01512	[L] Replication	2.75387	3.15387	0.15374	0.213661	0
CC_3073	CCNA_03169	Conserved hypothetical protein	CCNA_03169	Not classified	3.01579	2.66149	1.05142	0.50604	0
CC_3185	CCNA_03289	Hypothetical protein	CCNA_03289	[S] Function unknown	2.8504	3.64713	0.212339	0.69248	0
CC_0531	CCNA_00565	Gamma-glutamyltranspeptidase	CCNA_00565	[E] Amino acid transport and metabolism	2.7858	2.38879	0.890576	0.651415	0
CC_0258	CCNA_00259	Hypothetical protein	CCNA_00259	Not classified	3.11985	3.347	0.880739	0.148374	0
CC_2320	CCNA_02405	ABC membrane transporter, periplasmic component	CCNA_02405	[Q] Secondary metabolites biosynthesis	1.70385	2.94191	0.145426	0.436021	1
CC_2164	CCNA_02245	Molecular chaperones (DnaJ family)	CCNA_02245	Not classified	2.89523	1.60789	0.135572	0.248362	0
CC_2377	CCNA_02462	Hypothetical protein	CCNA_02462	[S] Function unknown	2.78416	2.79081	0.0454938	0.0795725	1
CC_3462	CCNA_03575	3-ketoacyl-CoA thiolase	CCNA_03575	[I] Lipid transport and metabolism	2.84204	3.02329	0.460436	0.0931695	0
CC_1078	CCNA_01132	Sensory transduction histidine kinase/receiver protein cckA	cckA	[T] Signal transduction mechanisms	2.92158	3.35492	0.435151	0.473395	1
CC_3162	CCNA_03265	CBS pair-family sensor histidine kinase/receiver domain protein	CCNA_03265	[K] Transcription	2.88971	2.48401	0.747676	0.382921	0
CC_1501	CCNA_01569	Hypothetical transcriptional regulatory protein	CCNA_01569	[K] Transcription	2.0632	2.91088	0.103585	1.03725	0
CC_0224	CCNA_00224	Conserved hypothetical protein (putative porin)	CCNA_00224	[P] Inorganic ion transport and metabolism	2.9203	3.3905	1.08846	0.754335	0
CC_0395	CCNA_00399	Zinc metallohydrolase, glyoxalase II family	CCNA_00399	[R] General function prediction only	1.97355	2.86275	0.1011	0.416073	0
CC_3409	CCNA_03520	Hypothetical protein	CCNA_03520	[S] Function unknown	2.70138	2.591	0.593005	0.167853	0
CC_0707	CCNA_00744	Hypothetical cytosolic protein	CCNA_00744	[L] Replication	2.7944	5.4646	0.493957	1.9579	1
CC_3461	CCNA_03574	TonB-dependent receptor	CCNA_03574	[P] Inorganic ion transport and metabolism	2.87887	3.959	0.63981	0.276613	0
CC_0078	CCNA_00076	Hypothetical protein	CCNA_00076	Not classified	2.7199	1.94964	0.00123107	0.14589	0
CC_1752	CCNA_01828	Conserved hypothetical protein	CCNA_01828	Not classified	2.69573	2.6875	0.100169	0.198539	0
CC_2486	CCNA_02571	Transporter	CCNA_02571	[G] Carbohydrate transport and metabolism	2.66977	3.43868	0.566332	0.532426	0
CC_3184	CCNA_03288	YcfA superfamily protein	CCNA_03288	[N] Cell motility	2.68364	3.39976	0.0536168	0.268944	0
CC_0938	CCNA_00987	Hypothetical protein	CCNA_00987	[S] Function unknown	1.39015	2.83315	0.330984	0.563924	0
CC_0639	CCNA_00675	Hypothetical cytosolic protein	CCNA_00675	[S] Function unknown	1.86985	2.72978	0.188909	0.0340019	0
CC_1409	CCNA_01475	OmpW family outer membrane protein	ompW	[M] Cell wall/membrane/envelope biogenesis	3.00716	1.22328	2.86682	0.49265	0
CC_1000	CCNA_01052	SapC family protein	CCNA_01052	Not classified	2.75243	2.16729	0.152301	0.214749	0
CC_3477	CCNA_03591	Hybrid sigma factor/two-component receiver protein phyR	phyR	[K] Transcription	1.21711	2.77795	0.372784	0.163898	1
CC_1682	CCNA_01754	Transglycosylase associated protein	CCNA_01754	[S] Function unknown	1.8352	2.77337	0.687691	0.427246	0
CC_3091	CCNA_03188	Epoxide hydrolase	CCNA_03188	[R] General function prediction only	2.83153	3.06343	0.58745	0.412601	0
CC_2620	CCNA_02703	Urate oxidase	CCNA_02703	[R] General function prediction only	3.01802	3.61552	0.608627	0.00210726	0
CC_0217	CCNA_00217	Thiol:disulfide interchange protein DsbD	CCNA_00217	[C] Energy production and conversion	2.94241	4.14833	0.926362	0.0799463	0
CC_0260	CCNA_00261	Ribonucleoside-diphosphate reductase beta chain	CCNA_00261	[F] Nucleotide transport and metabolism	2.78454	3.1258	0.163138	0.306318	1
CC_2642	CCNA_02725	Choline dehydrogenase	CCNA_02725	[E] Amino acid transport and metabolism	2.79115	3.40295	0.475277	0.124579	1
CC_0898	CCNA_00942	flagellar hook-associated protein flgL	flgL	[N] Cell motility	2.88317	0.968026	0.794461	0.0751499	1
CC_0079	CCNA_00077	Acyl-CoA dehydrogenase, long-chain specific	CCNA_00077	[I] Lipid transport and metabolism	2.95527	2.2663	0.987806	0.0100251	0
CC_2609	CCNA_02692	Hypothetical exported protein	CCNA_02692	[S] Function unknown	1.58754	2.69075	0.336612	0.138589	1
CC_0504	CCNA_00538	Methyl-accepting chemotaxis protein	CCNA_00538	[N] Cell motility	2.82773	3.14217	1.15573	0.265616	1
CC_0771	CCNA_00810	Acetyl esterase	CCNA_00810	[I] Lipid transport and metabolism	2.65179	2.62241	0.360229	0.0228986	0
CC_1190	CCNA_01248	Transcriptional regulator, TetR family	CCNA_01248	[K] Transcription	2.76359	3.39558	0.391391	0.24852	0
CC_3209	CCNA_03315	Molybdopterin biosynthesis MoeA protein	CCNA_03315	[H] Coenzyme transport and metabolism	2.01558	2.85885	0.0596606	0.667959	0
CC_2153	CCNA_02236	Polysaccharide deacetylase family	CCNA_02236	[G] Carbohydrate transport and metabolism	2.69937	2.79007	0.601996	0.41494	0
CC_2794	CCNA_02884	Transcriptional regulator, TetR family	CCNA_02884	[K] Transcription	2.82936	2.72087	0.395916	0.274704	0
CC_1308	CCNA_01366	Putative Fe-S protein	CCNA_01366	[R] General function prediction only	2.60365	2.93478	0.643513	0.0651519	0
CC_1641	CCNA_01713	2'-5' RNA ligase	CCNA_01713	[J] Translation	2.72502	2.46618	0.315831	0.395245	0
CC_0650	CCNA_00687	Conserved hypothetical protein	CCNA_00687	Not classified	2.68266	2.3222	0.101486	0.131011	0
CC_3442	CCNA_03555	Esterase lipase family protein	CCNA_03555	[R] General function prediction only	2.80665	3.13228	0.459634	0.617988	0
CC_1343	CCNA_01405	Hypothetical cytosolic protein	CCNA_01405	[L] Replication	2.773	3.3383	0.177931	0.545961	0
CC_1038	CCNA_01090	Conserved protein	CCNA_01090	[S] Function unknown	2.67657	3.27757	0.426413	0.0474537	0
CC_1406	CCNA_01472	Cation pump-linked membrane protein fixH	fixH	[P] Inorganic ion transport and metabolism	2.80846	1.36428	2.63827	0.499299	0
CC_2123	CCNA_02207	Conserved hypothetical protein	CCNA_02207	[M] Cell wall/membrane/envelope biogenesis	2.72186	3.302	0.612448	0.268305	0
CC_3088	CCNA_03185	Glutathione S-transferase	CCNA_03185	[O] Posttranslational modification	2.65865	3.14636	0.0589302	0.22674	0
CC_0128	CCNA_00127	Hypothetical protein	CCNA_00127	Not classified	1.27999	2.6741	0.159232	0.311699	0
CC_2035	CCNA_02115	Secreted pectate lyase-family protein	CCNA_02115	Not classified	1.95166	2.69744	0.122858	0.158924	0
CC_2088	CCNA_02170	Glutathione S-transferase	CCNA_02170	[O] Posttranslational modification	2.9142	3.02608	0.597217	0.303759	0
CC_2330	CCNA_02415	HTH transcriptional regulator	CCNA_02415	[K] Transcription	2.73817	4.01735	0.696798	0.895066	0
CC_3105	CCNA_03203	Threo-3-hydroxyaspartate ammonia-lyase	CCNA_03203	[E] Amino acid transport and metabolism	2.71817	2.57588	0.271562	0.0401254	1
CC_0396	CCNA_00400	Transcriptional regulator, MarR family	CCNA_00400	[K] Transcription	2.58873	1.723	0.175484	0.0340013	0
CC_2596	CCNA_02679	Conserved transmembrane protein	CCNA_02679	Not classified	1.87357	2.70893	0.17343	0.547016	0
CC_2407	CCNA_02490	3-ketoacyl-CoA thiolase	CCNA_02490	[I] Lipid transport and metabolism	2.73944	2.23795	0.0344767	0.102438	0
CC_1179	CCNA_01237	hypothetical protein	CCNA_01237	Not classified	1.51112	2.71664	0.53947	0.00791104	0
CC_3098	CCNA_03195	RNA polymerase sigma-32 factor	rpoH	[K] Transcription	1.77038	2.68367	0.0818174	0.292059	1
CC_2269	CCNA_02352	Membrane-bound aldehyde dehydrogenase, large subunit	CCNA_02352	[C] Energy production and conversion	2.64987	2.30612	0.270609	0.0588402	0
CC_3302	CCNA_03411	Hypothetical protein	CCNA_03411	Not classified	2.72282	2.47975	0.00263595	0.0829944	0
CC_1169	CCNA_01227	nitrilotriacetate monooxygenase	CCNA_01227	[C] Energy production and conversion	2.06305	2.77145	0.464255	0.160572	0
CC_0851	CCNA_00894	1-hydroxy-2-methyl-2-(E)-butenyl 4-diphosphate synthase	CCNA_00894	[I] Lipid transport and metabolism	2.68114	3.25383	0.25452	0.633152	1
CC_0895	CCNA_00939	Transcriptional regulator, MarR family	CCNA_00939	[K] Transcription	2.60464	2.39161	0.0689534	0.37528	0
CC_0572	CCNA_00608	Polygalacturonase	CCNA_00608	[M] Cell wall/membrane/envelope biogenesis	2.55771	2.24795	0.285193	0.207093	0
CC_2315	CCNA_02400	Transporter, MFS superfamily	CCNA_02400	[G] Carbohydrate transport and metabolism	1.51433	2.66028	0.0939744	0.605232	0
CC_1467	CCNA_01534	Hypothetical protein	CCNA_01534	Not classified	2.6036	2.83309	0.0854164	0.0998856	0
CC_0559	CCNA_00594	Conserved hypothetical protein	CCNA_00594	Not classified	1.40605	2.73295	0.0306047	0.815313	1
CC_3133	CCNA_03234	Glutamine amidotransferase, class I	CCNA_03234	[R] General function prediction only	0.806922	2.49303	0.264086	0.102515	0
CC_2730	CCNA_02815	Ice nucleation protein	CCNA_02815	Not classified	2.58197	2.91217	0.375437	0.560909	0
CC_0151	CCNA_00150	PDZ domain family protein	CCNA_00150	[O] Posttranslational modification	1.81493	2.52853	0.102174	0.229198	0
CC_3174	CCNA_03278	Aminobutyraldehyde dehydrogenase	CCNA_03278	[R] General function prediction only	2.5204	2.93129	0.144418	0.726896	0
CC_3508	CCNA_03623	Transcriptional regulator	CCNA_03623	[K] Transcription	2.6182	2.63341	0.146729	0.403823	0
CC_3330	CCNA_03439	Hypothetical protein	CCNA_03439	Not classified	1.64391	2.75894	0.475508	0.993535	0
CC_3725	CCNA_03841	Alpha/beta hydrolase fold protein	CCNA_03841	[R] General function prediction only	1.91862	2.54542	0.121618	0.1676	0
CC_3309	CCNA_03418	Thioesterase superfamily protein	CCNA_03418	[Q] Secondary metabolites biosynthesis	2.6983	2.28452	0.399097	0.082588	0
CC_0884	CCNA_00928	Transcriptional regulator, GntR family	CCNA_00928	[K] Transcription	0.994575	2.57229	0.0975844	0.0737552	0
CC_2839	CCNA_02931	flgE-related flagellar hook protein	CCNA_02931	[N] Cell motility	2.46952	2.33497	0.0337341	0.0273754	0
CC_3043	CCNA_03138	Peroxidase / Catalase katG	katG	[P] Inorganic ion transport and metabolism	2.50633	6.10297	0.327636	2.0147	0
CC_3459	CCNA_03572	Hypothetical cytosolic protein	CCNA_03572	Not classified	2.58277	2.80295	0.135529	0.261765	0
CC_3258	CCNA_03367	chemotaxis receiver domain protein cheYIII	CCNA_03367	[K] Transcription	2.67398	2.34457	1.41846	0.232263	1
CC_0919	CCNA_00967	Transcriptional regulator, TetR family	CCNA_00967	[K] Transcription	2.53915	3.70136	0.0165374	0.747006	0
CC_0937	CCNA_00986	General stress protein 17O	CCNA_00986	Not classified	2.56439	3.46958	0.424107	0.35237	0
CC_2785	CCNA_02873	Glyoxalase/Bleomycin resistance protein, dioxygenase superfamily	CCNA_02873	Not classified	2.53628	3.1249	0.210594	0.280753	0
CC_0201	CCNA_00201	Outer membrane protein	CCNA_00201	[M] Cell wall/membrane/envelope biogenesis	1.22718	2.66918	0.342511	0.676123	1
CC_2594	CCNA_02677	Glutathione S-transferase	CCNA_02677	[O] Posttranslational modification	2.55652	2.3296	0.107702	0.206803	0
CC_0076	CCNA_00074	Enoyl-CoA hydratase / Delta-cis-delta-trans-enoyl-CoA isomerase / 3-hydroxyacyl-CoA dehydrogenase / 3-hydroxybutyryl-CoA epimerase	CCNA_00074	[I] Lipid transport and metabolism	2.6305	2.95328	0.422613	0.0507859	0
CC_2970	CCNA_03065	Cytochrome c family protein	CCNA_03065	Not classified	1.58968	2.60863	0.183896	0.239525	0
CC_0421	CCNA_00426	Hypothetical cytosolic protein	CCNA_00426	[S] Function unknown	2.46881	2.74077	0.202179	0.0645182	0
CC_2511	CCNA_02597	Conserved hypothetical protein	CCNA_02597	Not classified	0.0712188	0.0734429	0.0128902	0.0136105	0
CC_0943	CCNA_00992	Conserved hypothetical protein	CCNA_00992	[S] Function unknown	2.05927	2.61516	0.373466	0.0850732	0
CC_3299	CCNA_03408	ABC transporter ATP-binding protein	CCNA_03408	[R] General function prediction only	2.57829	3.01009	0.0931923	0.0506809	1
CC_0391	CCNA_00395	Feruloyl-CoA synthetase	CCNA_00395	[I] Lipid transport and metabolism	2.54929	2.99382	0.387998	0.0749628	0
CC_3383	CCNA_03494	Serine protease	CCNA_03494	[R] General function prediction only	2.40898	2.81007	0.082595	0.178684	0
CC_1311	CCNA_01369	Acyl-CoA dehydrogenase, short-chain specific	CCNA_01369	[I] Lipid transport and metabolism	2.56118	2.83771	0.319589	0.155372	0
CC_3219	CCNA_03326	Two-component sensor histidine kinase	CCNA_03326	[K] Transcription	2.58138	2.82127	0.954622	0.0275822	1
CC_1960	CCNA_02037	ATP-dependent endopeptidase Lon	CCNA_02037	[O] Posttranslational modification	2.63319	3.10345	0.501753	0.240987	0
CC_1490	CCNA_01557	Uronate isomerase	CCNA_01557	[G] Carbohydrate transport and metabolism	1.86473	2.60052	0.125406	0.117638	0
CC_0823	CCNA_00866	2-hydroxyhepta-2,4-diene-1,7-dioate isomerase	xylX	[R] General function prediction only	2.4452	2.85903	0.561027	0.950403	0
CC_2147	CCNA_02230	Gluconate 2-dehydrogenase	CCNA_02230	[C] Energy production and conversion	1.85341	2.47357	0.0356103	0.329994	0
CC_2288	CCNA_02371	Tryptophan halogenase	CCNA_02371	Not classified	2.49737	2.99611	0.933877	0.39698	1
CC_1710	CCNA_01782	Polyphosphate kinase	ppk	[P] Inorganic ion transport and metabolism	2.54938	2.28223	0.428807	0.324156	0
CC_2532	CCNA_02615	Homogentisate 1,2-dioxygenase	CCNA_02615	[Q] Secondary metabolites biosynthesis	2.64545	2.91789	0.0861339	0.156318	0
CC_1507	CCNA_01575	Hypothetical exported protein	CCNA_01575	[G] Carbohydrate transport and metabolism	2.5885	3.12697	0.554652	0.263141	1
CC_2297	CCNA_02382	membrane peptidase, M23 family	CCNA_02382	[M] Cell wall/membrane/envelope biogenesis	2.40992	2.77296	0.0623066	0.352811	0
CC_0475	CCNA_00508	Conserved hypothetical protein	CCNA_00508	Not classified	2.47475	2.55747	0.75141	0.147394	0
CC_2798	CCNA_02888	nitrilotriacetate monooxygenase	CCNA_02888	[C] Energy production and conversion	2.5951	2.85411	0.0349273	0.111535	0
CC_3722	CCNA_03838	gluconate 2-dehydrogenase / glyoxylate reductase / hydroxypyruvate reductase	CCNA_03838	[C] Energy production and conversion	2.47958	2.32783	0.341581	0.160302	0
CC_3549	CCNA_03663	NADP-dependent malic enzyme	CCNA_03663	[C] Energy production and conversion	2.44373	2.50255	0.129642	0.1135	0
CC_2281	CCNA_02364	Methyl-accepting chemotaxis protein	CCNA_02364	[N] Cell motility	2.55269	1.79064	0.880502	0.392796	0
CC_1856	CCNA_01932	1-acyl-sn-glycerol-3-phosphate acyltransferase	CCNA_01932	[I] Lipid transport and metabolism	2.47683	2.04563	0.936805	0.177227	0
CC_2811	CCNA_02902	Xylan alpha-1,2-glucuronosidase	CCNA_02902	[G] Carbohydrate transport and metabolism	2.52295	2.29325	0.445959	0.316463	0
CC_1178	CCNA_01236	Hypothetical cytosolic protein	CCNA_01236	[R] General function prediction only	1.41566	2.45908	0.310592	0.253297	1
CC_3106	CCNA_03204	Alanine racemase	CCNA_03204	[E] Amino acid transport and metabolism	2.60351	2.92011	0.213513	0.251695	0
CC_1107	CCNA_01164	O-linked GLCNAC transferase	CCNA_01164	[O] Posttranslational modification	1.68506	2.57487	0.433365	0.94761	1
CC_1484	CCNA_01551	hypothetical protein	CCNA_01551	Not classified	2.47683	2.85614	0.67062	0.177801	0
CC_1783	CCNA_01861	Hypothetical protein	CCNA_01861	Not classified	2.56141	3.41675	0.69197	0.702965	0
CC_1628	CCNA_01700	Nucleoside permease NUPG	CCNA_01700	Not classified	2.48087	2.28999	0.511967	0.0820925	0
CC_0830	CCNA_00873	Amidophosphoribosyltransferase family protein	CCNA_00873	[R] General function prediction only	2.58952	2.83012	0.153109	0.120068	0
CC_1613	CCNA_01685	Hemimethylated DNA-binding protein yccV	CCNA_01685	[S] Function unknown	2.42066	2.58332	0.441281	0.00853791	0
CC_1531	CCNA_01600	Hypothetical protein	CCNA_01600	Not classified	2.58778	2.10938	0.61453	0.23254	0
CC_1295	CCNA_01353	3-phytase / 6-phytase	CCNA_01353	[I] Lipid transport and metabolism	2.40212	3.71029	0.376601	0.295791	0
CC_1068	CCNA_01121	Conserved hypothetical protein	CCNA_01121	Not classified	2.28461	3.419	0.0591493	0.621458	1
CC_3095	CCNA_03192	Transposase	CCNA_03192	[S] Function unknown	2.4521	2.94317	0.563384	0.799365	0
CC_3128	CCNA_03228	Tetratricopeptide repeat family protein	CCNA_03228	[R] General function prediction only	2.47406	2.51844	0.260848	0.277107	0
CC_1033	CCNA_01085	DNA-cytosine methyltransferase	CCNA_01085	[L] Replication	1.9398	2.56246	0.335749	0.743631	0
CC_1639	CCNA_01711	Transcriptional regulator	CCNA_01711	[K] Transcription	2.52512	3.05432	0.34839	0.54756	0
CC_2731	CCNA_02816	hypothetical protein	CCNA_02816	Not classified	2.5749	3.12799	0.457706	0.997982	0
CC_1136	CCNA_01194	TonB-dependent receptor	CCNA_01194	[P] Inorganic ion transport and metabolism	2.45727	2.70931	0.770233	0.103878	0
CC_2745	CCNA_02831	Conserved hypothetical protein	CCNA_02831	[S] Function unknown	1.91057	2.3941	0.0855571	0.0335333	0
CC_1294	CCNA_01352	Two component sensor histidine kinase	CCNA_01352	[T] Signal transduction mechanisms	1.50569	2.48282	0.233218	0.00223593	1
CC_1300	CCNA_01358	myo-inositol catabolism protein iolE	iolE	[G] Carbohydrate transport and metabolism	1.78447	2.50664	0.0292057	0.713248	0
CC_2187	CCNA_02269	L-aminopeptidase/D-esterase dmpA	CCNA_02269	[E] Amino acid transport and metabolism	2.40744	2.19637	0.166596	0.632953	1
CC_0792	CCNA_00834	Flagellin	CCNA_00834	[N] Cell motility	2.00734	2.42858	0.349386	0.160421	1
CC_1197	CCNA_01255	Hypothetical protein	CCNA_01255	Not classified	2.54491	2.53982	0.258868	0.567852	0
CC_3408	CCNA_03519	Transcriptional regulator, PadR family	CCNA_03519	[K] Transcription	2.54369	2.07325	0.0145371	0.311281	1
CC_1279	CCNA_01338	Glyoxalase family protein	CCNA_01338	[S] Function unknown	1.81364	2.59961	0.00829843	0.123564	0
CC_1347	CCNA_01409	Delta-aminolevulinic acid dehydratase	CCNA_01409	[H] Coenzyme transport and metabolism	2.42435	2.78694	0.0822525	0.24415	0
CC_2270	CCNA_02353	Membrane-bound aldehyde dehydrogenase iron-sulfur protein	CCNA_02353	[C] Energy production and conversion	2.41417	1.99363	0.130135	0.540569	0
CC_2587	CCNA_02670	ABC transporter ATP-binding protein	CCNA_02670	[R] General function prediction only	2.51311	2.34122	0.674548	0.324877	0
CC_1813	CCNA_01890	Enoyl-CoA hydratase/isomerase family protein	CCNA_01890	[I] Lipid transport and metabolism	2.37673	2.77398	0.0173749	0.0298544	0
CC_1967	CCNA_02045	Acetyl-coenzyme A synthetase	CCNA_02045	[I] Lipid transport and metabolism	2.40236	2.32071	0.25373	0.323613	0
CC_0961	CCNA_01012	Atrazine chlorohydrolase	CCNA_01012	[F] Nucleotide transport and metabolism	1.61091	2.49831	0.0631539	0.25358	0
CC_1510	CCNA_01578	Beta-lactamase repressor	CCNA_01578	[K] Transcription	1.48229	2.50467	0.129753	0.0302329	0
CC_1541	CCNA_01610	2-isopropylmalate synthase	CCNA_01610	[E] Amino acid transport and metabolism	2.4165	6.13384	0.250628	0.326955	0
CC_1461	CCNA_01528	Flagellin	fljK	[N] Cell motility	2.35532	2.5204	0.310772	0.264116	1
CC_0773	CCNA_00812	Hypothetical cytosolic protein	CCNA_00812	[S] Function unknown	2.43236	2.01381	0.682185	0.141014	0
CC_2478	CCNA_02563	Acyl-CoA dehydrogenase	CCNA_02563	[I] Lipid transport and metabolism	2.4273	2.43366	0.171154	0.134475	0
CC_3077	CCNA_03173	Hypothetical cytosolic protein	CCNA_03173	[S] Function unknown	2.36402	2.23225	0.112636	0.0336917	0
CC_3000	CCNA_03095	Mechanosensitive ion channel	CCNA_03095	[M] Cell wall/membrane/envelope biogenesis	2.48343	2.49875	0.242538	0.837563	0
CC_2901	CCNA_02995	Glutathione S-transferase	CCNA_02995	[O] Posttranslational modification	2.62506	3.40501	0.297927	0.393455	0
CC_2648	CCNA_02731	Acetyltransferase	CCNA_02731	[R] General function prediction only	2.42763	1.7001	0.451347	0.034486	0
CC_0300	CCNA_00302	Parathion hydrolase	CCNA_00302	[Q] Secondary metabolites biosynthesis	2.30354	2.58887	0.172047	0.388039	0
CC_2274	CCNA_02357	Malonate-semialdehyde dehydrogenase (acetylating) / Methylmalonate-semialdehyde dehydrogenase (acylating)	CCNA_02357	[C] Energy production and conversion	2.44541	2.7085	0.133768	0.234301	0
CC_3416	CCNA_03529	Polyphosphate kinase	CCNA_03529	[S] Function unknown	2.53242	2.8466	0.28622	0.0353072	0
CC_1066	CCNA_01119	Hypothetical protein	CCNA_01119	Not classified	2.3958	2.13307	0.366285	0.0564458	0
CC_3341	CCNA_03449	Methyltransferase	CCNA_03449	Not classified	2.33402	2.66813	0.189485	0.373425	0
CC_0834	CCNA_00877	Hypothetical protein	CCNA_00877	Not classified	2.41501	2.6751	0.0964613	0.10244	0
CC_3596	CCNA_03710	Nitrogen regulatory IIA protein	CCNA_03710	[G] Carbohydrate transport and metabolism	2.43906	3.20034	0.450545	0.137257	0
CC_2081	CCNA_02163	hypothetical protein	CCNA_02163	Not classified	1.78855	2.50686	0.0418036	0.301441	0
CC_2708	CCNA_02791	FecR family protein	CCNA_02791	[P] Inorganic ion transport and metabolism	2.41758	3.4724	0.0255341	0.582853	0
CC_1766	CCNA_01844	DNA integration/recombination/inversion protein	CCNA_01844	[L] Replication	2.51619	2.66157	0.211753	0.728913	0
CC_2362	CCNA_02447	putative alpha helical protein	CCNA_02447	[K] Transcription	1.79816	2.37618	0.426733	0.0866105	1
CC_2554	CCNA_02637	PAS-family sensor histidine kinase	CCNA_02637	[T] Signal transduction mechanisms	1.90416	2.51494	0.133573	0.0329309	0
CC_1241	CCNA_01299	Conserved hypothetical protein	CCNA_01299	[S] Function unknown	2.32423	2.25121	0.188835	0.449572	0
CC_0380	CCNA_00384	Glucan endo-1,3-beta-glucosidase	CCNA_00384	[G] Carbohydrate transport and metabolism	2.35657	2.36786	0.00244507	0.443138	0
CC_0912	CCNA_00958	Hypothetical protein	CCNA_00958	Not classified	2.12057	2.16399	0.0662201	0.438962	0
CC_1650	CCNA_01722	Hypothetical protein	CCNA_01722	Not classified	2.60064	3.05207	0.455946	0.311004	0
CC_3634	CCNA_03749	2-hydroxy-6-oxo-6-phenylhexa-2,4-dienoate hydrolase	CCNA_03749	[R] General function prediction only	2.50185	2.32796	0.403241	0.198844	0
CC_1101	CCNA_01157	Protoporphyrinogen oxidase	CCNA_01157	[H] Coenzyme transport and metabolism	2.36417	3.03458	0.719986	1.22759	1
CC_2365	CCNA_02450	surface protein	CCNA_02450	[S] Function unknown	2.37865	3.56595	0.153966	0.902948	0
CC_0936	CCNA_00985	Protease II	CCNA_00985	[E] Amino acid transport and metabolism	1.81783	2.36163	0.0526046	0.379647	0
CC_3026	CCNA_03121	Hypothetical protein	CCNA_03121	Not classified	1.93293	2.33264	0.100019	0.161965	0
CC_3300	CCNA_03409	Putative hydrolase	CCNA_03409	[I] Lipid transport and metabolism	2.43143	2.2955	0.0618688	0.0993507	0
CC_1454	CCNA_01521	Hypothetical exported protein	CCNA_01521	Not classified	2.32348	2.15106	0.600383	0.496593	0
CC_1488	CCNA_01555	Altronate hydrolase	CCNA_01555	[G] Carbohydrate transport and metabolism	1.96274	2.28847	0.31754	0.400104	0
CC_1855	CCNA_01931	Transcriptional regulator, TetR family	CCNA_01931	[K] Transcription	2.35962	2.35069	0.129112	0.463816	0
CC_1353	CCNA_01415	Methyltransferase	CCNA_01415	[R] General function prediction only	1.64154	2.3002	0.12923	0.25373	0
CC_0986	CCNA_01037	Transcriptional regulator, GntR family	CCNA_01037	[K] Transcription	2.46609	2.81734	0.221029	0.254105	0
CC_2960	CCNA_03054	Transcriptional regulator, AraC family	CCNA_03054	[K] Transcription	2.31504	1.73557	0.389061	0.376906	0
CC_3136	CCNA_03238	Transporter	CCNA_03238	[E] Amino acid transport and metabolism	2.27431	5.98926	0.306858	0.0519392	0
CC_0264	CCNA_00265	AMP nucleosidase	CCNA_00265	[F] Nucleotide transport and metabolism	2.31584	2.70531	0.165987	0.207149	0
CC_2641	CCNA_02724	Oxidoreductase	CCNA_02724	[C] Energy production and conversion	2.45945	2.78066	0.486019	0.13588	0
CC_3574	CCNA_03689	Alanine dehydrogenase	CCNA_03689	[E] Amino acid transport and metabolism	3.28478	2.46087	2.99352	1.65307	0
CC_0924	CCNA_00973	Hypothetical phosphatase	CCNA_00973	[S] Function unknown	2.35601	1.89597	0.145974	0.236321	0
CC_1124	CCNA_01182	Glutathione S-transferase	CCNA_01182	[O] Posttranslational modification	2.44707	2.53865	0.0414035	0.335708	0
CC_2869	CCNA_02962	Hypothetical protein	CCNA_02962	[S] Function unknown	2.36255	3.34939	0.469741	0.591341	0
CC_0557	CCNA_00592	Hypothetical protein	CCNA_00592	Not classified	1.39713	2.31566	0.057148	0.0813678	0
CC_2124	CCNA_02208	Thymidylate synthase	CCNA_02208	[F] Nucleotide transport and metabolism	2.35834	2.55571	0.358655	0.0339141	1
CC_2501	CCNA_02587	PAS-family sensor histidine kinase	CCNA_02587	[T] Signal transduction mechanisms	2.53983	2.56526	0.720659	0.363688	0
CC_2504	CCNA_02590	Conserved hypothetical protein	CCNA_02590	[C] Energy production and conversion	1.62861	2.35694	0.106854	0.0985865	0
CC_2063	CCNA_02142	Flagellar basal-body rod protein flgF	flgF	[N] Cell motility	2.37727	0.852382	0.430471	0.0475092	1
CC_2836	CCNA_02927	Short chain dehydrogenase	CCNA_02927	[I] Lipid transport and metabolism	2.28624	2.2576	0.543874	0.672993	0
CC_0397	CCNA_00401	Delta(3)-cis-delta(2)-trans-enoyl-CoA isomerase	CCNA_00401	[I] Lipid transport and metabolism	2.38802	2.30836	0.151946	0.151616	0
CC_2563	CCNA_02646	Cell division protein mraZ	CCNA_02646	[S] Function unknown	1.64799	2.26814	0.50826	0.0614699	0
CC_1106	CCNA_01163	Ice nucleation protein	CCNA_01163	Not classified	2.39969	2.61419	0.725341	0.744417	0
CC_2072	CCNA_02153	Acetylspermidine deacetylase	CCNA_02153	[B] Chromatin structure and dynamics	2.27068	1.86311	0.0366322	0.326952	0
CC_1412	CCNA_01478	Transcriptional regulator	CCNA_01478	[T] Signal transduction mechanisms	1.90711	2.2443	0.314526	0.273449	0
CC_2161	CCNA_02243	D-alanyl-D-alanine serine-type carboxypeptidase	CCNA_02243	[M] Cell wall/membrane/envelope biogenesis	2.38987	2.40828	0.35998	0.21471	0
CC_0778	CCNA_00818	Glutathione S-transferase	CCNA_00818	[O] Posttranslational modification	2.26121	2.69557	0.106764	0.137991	0
CC_2460	CCNA_02544	hypothetical protein	CCNA_02544	Not classified	2.22066	1.88179	0.0792363	0.150919	0
CC_0104	CCNA_00103	Gamma-glutamyltranspeptidase	CCNA_00103	[E] Amino acid transport and metabolism	2.20259	1.9669	0.00124537	0.0220419	0
CC_3757	CCNA_03873	Conserved hypothetical protein	CCNA_03873	Not classified	2.38967	2.56963	0.0364929	0.156303	0
CC_2064	CCNA_02143	Flagellar basal-body rod protein flgG	flgG	[N] Cell motility	2.30847	0.749843	0.543013	0.0275387	1
CC_2915	CCNA_03009	Nicotinate-nucleotide pyrophosphorylase [carboxylating]	CCNA_03009	[H] Coenzyme transport and metabolism	2.29562	2.10371	0.0266332	0.352385	0
CC_2757	CCNA_02845	Two-component response regulator	CCNA_02845	[K] Transcription	1.94164	2.2769	0.205728	0.149655	0
CC_0066	CCNA_00064	Methyl-accepting chemotaxis protein	CCNA_00064	[N] Cell motility	2.35556	1.71401	0.585198	0.0246885	0
CC_2119	CCNA_02203	Hypothetical exported protein	CCNA_02203	[S] Function unknown	2.26923	1.43711	0.263315	0.0541099	1
CC_2363	CCNA_02448	Hypothetical protein	CCNA_02448	[S] Function unknown	1.9579	2.25777	0.370593	0.433854	1
CC_0896	CCNA_00940	Sensory transduction protein kinase	CCNA_00940	[T] Signal transduction mechanisms	2.20488	2.16734	0.145694	0.40426	0
CC_1636	CCNA_01708	Conserved hypothetical protein	CCNA_01708	[S] Function unknown	2.31914	2.19928	0.0051459	0.178576	0
CC_0992	CCNA_01044	Transcriptional regulator	CCNA_01044	[K] Transcription	2.31028	2.67719	0.407035	0.0335752	0
CC_3457	CCNA_03570	Conserved hypothetical protein	CCNA_03570	[S] Function unknown	2.22595	2.03973	0.214816	0.0484017	0
CC_3285	CCNA_03394	Two-component response regulator	CCNA_03394	[T] Signal transduction mechanisms	1.55738	2.19747	0.157211	0.671684	0
CC_1607	CCNA_01679	Succinylglutamic semialdehyde dehydrogenase	CCNA_01679	[C] Energy production and conversion	2.45798	2.42495	0.622361	0.112987	0
CC_2183	CCNA_02265	Peptide methionine sulfoxide reductase msrB	CCNA_02265	[O] Posttranslational modification	2.24877	2.77862	0.141903	0.458286	0
CC_1023	CCNA_01075	Cell division protein ftsZ	CCNA_01075	Not classified	2.24724	2.63311	0.477152	0.398796	0
CC_0710	CCNA_00747	cyclic-di-GMP phosphodiesterase, flagellum assembly factor tipF	tipF	[T] Signal transduction mechanisms	2.30446	3.27427	0.454537	0.289117	1
CC_1048	CCNA_01100	Acylamino-acid-releasing enzyme	CCNA_01100	[E] Amino acid transport and metabolism	1.80242	2.26233	0.238293	0.127164	0
CC_1036	CCNA_01088	Hypothetical membrane spanning protein	CCNA_01088	[S] Function unknown	2.284	2.17455	0.080901	0.264133	0
CC_2399	CCNA_02482	Transcriptional regulator, AraC family	CCNA_02482	[K] Transcription	2.28086	2.97235	0.588726	0.291025	0
CC_0382	CCNA_00386	DNA-3-methyladenine glycosylase	CCNA_00386	[L] Replication	2.31191	2.46915	0.4426	0.404595	0
CC_1006	CCNA_01058	Transcriptional regulator	CCNA_01058	Not classified	1.57985	2.27054	0.16176	0.225864	0
CC_1475	CCNA_01542	Ice nucleation protein	CCNA_01542	Not classified	2.32571	2.66997	0.0625933	0.290425	1
CC_0804	CCNA_00846	Proline dehydrogenase / Delta-1-pyrroline-5-carboxylate dehydrogenase	CCNA_00846	[C] Energy production and conversion	2.14977	2.2444	0.292054	0.406908	0
CC_0933	CCNA_00982	Transcriptional regulator	CCNA_00982	[K] Transcription	1.62719	2.32633	0.153336	0.20985	0
CC_2229	CCNA_02312	SLA2 protein	CCNA_02312	[S] Function unknown	2.30352	2.47976	0.0203478	0.00761841	1
CC_1713	CCNA_01785	Hypothetical protein	CCNA_01785	Not classified	2.3372	2.06026	0.535314	0.461269	0
CC_3004	CCNA_03099	Hypothetical protein	CCNA_03099	Not classified	2.15836	2.07604	0.0353454	0.00808037	1
CC_1344	CCNA_01406	Predicted metal-dependent hydrolase	CCNA_01406	[R] General function prediction only	1.96571	2.28194	0.0867051	0.0164087	0
CC_3578	CCNA_03693	Creatinine amidohydrolase family protein	CCNA_03693	[R] General function prediction only	2.21959	2.55249	0.0433955	0.00638696	0
CC_2204	CCNA_02287	Transcriptional regulator, TetR family	CCNA_02287	[K] Transcription	1.34128	2.26772	0.0448815	0.187753	0
CC_1962	CCNA_02040	Phosphoserine phosphatase	CCNA_02040	[E] Amino acid transport and metabolism	1.74344	2.34193	0.156963	0.227421	1
CC_0849	CCNA_00892	Phosphoenolpyruvate-protein phosphotransferase	CCNA_00892	[T] Signal transduction mechanisms	1.96578	2.29053	0.142449	0.0522347	0
CC_1171	CCNA_01229	2-hydroxychromene-2-carboxylate isomerase	CCNA_01229	[Q] Secondary metabolites biosynthesis	2.20853	2.45982	0.15515	0.0538618	0
CC_0074	CCNA_00072	Conserved hypothetical protein	CCNA_00072	[S] Function unknown	2.27793	2.68292	0.591097	0.19416	0
CC_1645	CCNA_01717	Hypothetical protein	CCNA_01717	Not classified	2.1892	5.16979	0.22942	1.04357	0
CC_2012	CCNA_02091	conserved hypothetical protein	CCNA_02091	Not classified	2.23499	2.94221	0.654233	0.309337	1
CC_1387	CCNA_01451	Cold shock protein cspD	cspD	[K] Transcription	2.18919	2.47566	0.225005	0.153252	0
CC_0123	CCNA_00122	Conserved hypothetical protein	CCNA_00122	[S] Function unknown	2.23446	2.77943	0.000781075	0.247299	0
CC_0946	CCNA_00995	Putative cytochrome P450 YJIB	CCNA_00995	[Q] Secondary metabolites biosynthesis	2.29021	2.85761	0.450111	0.320146	0
CC_0877	CCNA_00921	Zinc metalloprotease	CCNA_00921	[R] General function prediction only	1.76333	2.17424	0.350591	0.280744	0
CC_0090	CCNA_00088	HerA helicase-related ATPase	CCNA_00088	[R] General function prediction only	2.21971	2.31801	0.340164	0.343043	0
CC_0651	CCNA_00688	Conserved hypothetical protein	CCNA_00688	Not classified	2.17481	2.66773	0.31588	0.321128	0
CC_2996	CCNA_03091	Hypothetical protein	CCNA_03091	Not classified	2.04704	2.21951	0.0226882	0.167952	0
CC_1880	CCNA_01957	Thiazole biosynthesis protein thiG	thiG	[H] Coenzyme transport and metabolism	1.77062	2.23055	0.0779144	0.394538	0
CC_1149	CCNA_01207	Two-component sensor kinase yocF	yocF	[T] Signal transduction mechanisms	1.94491	2.24981	0.185386	0.543282	0
CC_1836	CCNA_01913	Transcriptional regulator, MarR family	CCNA_01913	[K] Transcription	1.84338	2.22537	0.104551	0.243856	0
CC_0356	CCNA_00361	Conserved hypothetical protein	CCNA_00361	[R] General function prediction only	1.83556	2.14693	0.117536	0.0903213	0
CC_3671	CCNA_03785	Hypothetical protein	CCNA_03785	Not classified	2.31873	1.34739	0.557278	0.0487559	0
CC_0980	CCNA_01031	Transporter	CCNA_01031	[G] Carbohydrate transport and metabolism	2.03637	2.19942	0.519144	0.0626084	0
CC_2299	CCNA_02384	Very-long-chain acyl-CoA synthetase	CCNA_02384	[I] Lipid transport and metabolism	2.38605	2.13535	0.812016	0.0620963	0
CC_3229	CCNA_03337	Peptidoglycan-associated lipoprotein pal	Pal	[M] Cell wall/membrane/envelope biogenesis	2.24513	1.8863	0.346919	0.229894	1
CC_3214	CCNA_03320	Biotin carboxylase	CCNA_03320	[I] Lipid transport and metabolism	2.24665	2.35038	0.034784	0.490431	0
CC_2674	CCNA_02756	Putative competence-damage protein	CCNA_02756	[R] General function prediction only	2.12885	2.87356	0.381591	0.282155	0
CC_0354	CCNA_00359	SH3 domain-containing cell surface protein	CCNA_00359	Not classified	2.26135	2.20999	0.418362	0.0897928	0
CC_3703	CCNA_03817	Glutamate racemase	CCNA_03817	[M] Cell wall/membrane/envelope biogenesis	2.2324	1.99598	0.184093	0.0801327	0
CC_2316	CCNA_02401	Transcriptional regulator	CCNA_02401	[K] Transcription	2.22289	2.40004	0.509996	0.155431	1
CC_0376	CCNA_00380	Hypothetical cytosolic protein	CCNA_00380	[S] Function unknown	1.75425	2.2616	0.107239	0.00788113	0
CC_3542	CCNA_03656	Acetyl-coenzyme A carboxylase carboxyl transferase subunit beta	CCNA_03656	[I] Lipid transport and metabolism	1.69516	2.13933	0.165798	0.127792	0
CC_2521	CCNA_02606	hybrid sensor histidine kinase/receiver domain protein	CCNA_02606	[T] Signal transduction mechanisms	1.95659	2.22433	0.362248	0.238074	0
CC_1876	CCNA_01952	N-acetylmuramoyl-L-alanine amidase	CCNA_01952	[M] Cell wall/membrane/envelope biogenesis	1.83043	2.15286	0.193374	0.0351976	1
CC_0743	CCNA_00780	N-formylglutamate deformylase	CCNA_00780	[E] Amino acid transport and metabolism	2.16783	2.264	0.0244271	0.0760331	0
CC_2748	CCNA_02834	Molybdopterin dependent oxidoreductase	CCNA_02834	[R] General function prediction only	1.46984	2.16001	0.249351	0.0264412	0
CC_0547	CCNA_00582	Hypothetical protein	CCNA_00582	Not classified	1.64588	2.11475	0.0909569	0.0646063	0
CC_2593	CCNA_02676	Conserved hypothetical protein	CCNA_02676	Not classified	2.21452	2.23521	0.360978	0.328176	0
CC_1404	CCNA_01470	Cytochrome cbb3 oxidase, diheme subunit, membrane-bound ccoP	ccoP	[C] Energy production and conversion	2.14188	1.43306	1.63415	0.506536	0
CC_3121	CCNA_03221	Phytoene dehydrogenase	CCNA_03221	[Q] Secondary metabolites biosynthesis	1.79539	2.2088	0.105294	0.497516	0
CC_3659	CCNA_03774	Citrate lyase beta chain / Citryl-CoA lyase subunit	CCNA_03774	[G] Carbohydrate transport and metabolism	1.63588	2.13388	0.0894679	0.0565502	1
CC_0706	CCNA_00743	NnrU	CCNA_00743	[S] Function unknown	1.85958	2.14279	0.0420469	0.0674093	1
CC_2325	CCNA_02410	Alpha-methylacyl-CoA racemase	CCNA_02410	[C] Energy production and conversion	2.13743	2.02392	0.111028	0.0237839	0
CC_0520	CCNA_00554	Methyltransferase	CCNA_00554	Not classified	2.13945	2.24959	0.359433	0.139291	0
CC_2469	CCNA_02554	Conserved hypothetical protein	CCNA_02554	Not classified	2.14784	2.21732	0.348441	0.0351807	0
CC_1100	CCNA_01156	Hypothetical protein	CCNA_01156	Not classified	2.17981	2.78755	0.331002	0.127647	0
CC_2014	CCNA_02093	Hypothetical cytosolic protein	CCNA_02093	[S] Function unknown	2.17727	3.38781	0.0591504	0.259108	0
CC_2366	CCNA_02451	surface protein	CCNA_02451	[S] Function unknown	2.13008	2.93436	0.381299	0.616756	1
CC_2036	CCNA_02116	putative capsule polysaccharide biosynthesis protein	CCNA_02116	Not classified	2.2618	2.47819	0.616217	0.373891	0
CC_0468	CCNA_00501	Glucosyltransferase	CCNA_00501	[M] Cell wall/membrane/envelope biogenesis	1.76287	2.12496	0.360762	0.19744	0
CC_3010	CCNA_03105	Molecular chaperones (DnaJ family)	CCNA_03105	Not classified	1.93596	2.2858	0.273043	0.549194	0
CC_0158	CCNA_00157	Glyoxalase family protein	CCNA_00157	[E] Amino acid transport and metabolism	1.76689	2.15871	0.259427	0.219597	0
CC_2540	CCNA_02623	Cell division protein ftsZ	ftsZ	[D] Cell cycle control	2.17626	2.52613	0.442297	0.178449	1
CC_2673	CCNA_02755	Transcriptional regulator	CCNA_02755	[K] Transcription	2.15459	2.43751	0.00923717	0.0536322	0
CC_1579	CCNA_01650	Superoxide dismutase [Cu-Zn]	CCNA_01650	[P] Inorganic ion transport and metabolism	2.17937	2.67123	0.131376	0.308571	0
CC_0455	CCNA_00487	Alkaline phosphatase	CCNA_00487	[P] Inorganic ion transport and metabolism	2.1598	2.12696	0.454945	0.281305	0
CC_2868	CCNA_02961	N-acetylneuraminate synthase	CCNA_02961	[M] Cell wall/membrane/envelope biogenesis	1.52844	2.28165	0.21696	0.142601	1
CC_2481	CCNA_02566	Membrane alanine aminopeptidase	CCNA_02566	[E] Amino acid transport and metabolism	1.81006	2.20217	0.0309133	0.141126	1
CC_2392	CCNA_02475	Transcriptional regulator vanR	vanR	[K] Transcription	2.13334	2.39389	0.0262956	0.227795	0
CC_0822	CCNA_00865	alpha-ketoglutaric semialdehyde dehydrogenase xylA	xylA	[C] Energy production and conversion	2.20771	1.64139	0.493841	0.258648	0
CC_1128	CCNA_01186	Conserved hypothetical protein	CCNA_01186	Not classified	2.22878	1.82145	0.200519	0.176573	1
CC_3507	CCNA_03622	Beta-lactamase repressor	CCNA_03622	[K] Transcription	1.82557	2.16615	0.058998	0.510995	0
CC_3467	CCNA_03580	Hypothetical protein	CCNA_03580	[S] Function unknown	2.19736	1.82707	0.594348	0.25461	1
CC_3028	CCNA_03123	Transcriptional regulator, ArsR family	CCNA_03123	[K] Transcription	1.52621	2.12538	0.252653	0.16153	0
CC_2310	CCNA_02395	hypothetical protein	CCNA_02395	Not classified	2.11939	1.9067	0.249385	0.104564	1
CC_3397	CCNA_03508	Ribosomal-protein-S5-alanine acetyltransferase	CCNA_03508	[J] Translation	2.08075	2.00401	0.0452186	0.660659	0
CC_0591	CCNA_00628	Chemotaxis protein cheY	cheY	[T] Signal transduction mechanisms	2.10466	1.95651	0.63445	0.188729	0
CC_3381	CCNA_03492	Transporter	CCNA_03492	[R] General function prediction only	1.84483	2.10709	0.24503	0.0361245	0
CC_0817	CCNA_00860	Hypothetical protein	CCNA_00860	Not classified	2.12798	3.26936	0.381652	0.178632	0
CC_1868	CCNA_01944	Hypothetical cytosolic protein	CCNA_01944	[V] Defense mechanisms	2.0694	2.32589	0.799218	0.752737	0
CC_1697	CCNA_01768	Hypothetical protein	CCNA_01768	Not classified	2.10145	1.83462	0.371021	0.114062	1
CC_0522	CCNA_00556	Phospholipase D	CCNA_00556	[I] Lipid transport and metabolism	1.45056	2.20435	0.00153395	0.25023	0
CC_2254	CCNA_02337	Nonspecific lipid-transfer protein	CCNA_02337	[I] Lipid transport and metabolism	2.09475	1.86462	0.391015	0.117196	0
CC_0511	CCNA_00545	Acetoacetyl-CoA reductase	CCNA_00545	[I] Lipid transport and metabolism	2.1268	1.9572	0.0179688	0.0502124	0
CC_2067	CCNA_02146	hypothetical protein	CCNA_02146	Not classified	2.00007	2.5243	0.0713022	0.237863	0
CC_0206	CCNA_00206	Succinyl-CoA:3-ketoacid-coenzyme A transferase subunit A	CCNA_00206	[I] Lipid transport and metabolism	1.69489	2.1577	0.0718002	0.359291	0
CC_2457	CCNA_02541	Phosphohydrolase (MutT/nudix family protein)	CCNA_02541	Not classified	2.13407	2.21758	0.0268497	0.410982	0
CC_0357	CCNA_00362	Zinc uptake regulation protein	CCNA_00362	[P] Inorganic ion transport and metabolism	2.12144	2.27085	0.129061	0.159786	0
CC_2319	CCNA_02404	ABC transporter ATP-binding protein	CCNA_02404	[Q] Secondary metabolites biosynthesis	1.25615	2.11592	0.133072	0.152194	0
CC_3506	CCNA_03621	Transcriptional regulator, AraC family	CCNA_03621	[K] Transcription	2.11764	2.719	0.103604	0.461518	0
CC_0539	CCNA_00573	TonB-dependent receptor	CCNA_00573	[P] Inorganic ion transport and metabolism	1.478	2.10366	0.628385	0.022526	1
CC_2692	CCNA_02774	hypothetical protein	CCNA_02774	Not classified	2.13301	2.99109	0.142402	0.484047	0
CC_3325	CCNA_03434	Two-component response regulator	CCNA_03434	[K] Transcription	1.59264	2.26385	0.502696	0.464271	0
CC_1433	CCNA_01500	Conserved hypothetical protein	CCNA_01500	Not classified	1.88935	2.17857	0.0680392	0.290997	0
CC_3218	CCNA_03325	Hypothetical protein	CCNA_03325	Not classified	2.09867	3.29266	0.00718625	0.400692	1
CC_2503	CCNA_02589	bolA-related transcriptional regulator	CCNA_02589	[T] Signal transduction mechanisms	2.11328	2.69147	0.0449853	0.158775	0
CC_2184	CCNA_02266	Glutathione S-transferase GST	CCNA_02266	[O] Posttranslational modification	1.88019	2.10932	0.0279242	0.0441989	0
CC_2575	CCNA_02658	3-hydroxybutyryl-CoA dehydratase	CCNA_02658	[I] Lipid transport and metabolism	2.07337	2.73275	0.186874	0.156691	0
CC_0191	CCNA_00191	N-acetylglutamate synthase domain protein	CCNA_00191	[E] Amino acid transport and metabolism	2.25373	3.04809	0.222947	0.316418	0
CC_3180	CCNA_03284	Adenosine deaminase	CCNA_03284	[F] Nucleotide transport and metabolism	1.73676	2.14496	0.230155	0.384829	0
CC_3480	CCNA_03594	SIR2 family protein	CCNA_03594	[K] Transcription	2.03913	2.14077	0.0854758	0.377894	0
CC_3710	CCNA_03825	Hypothetical protein	CCNA_03825	Not classified	2.1122	2.93	0.0693014	0.17815	0
CC_2947	CCNA_03042	Pilus assembly prepilin peptidase CpaA	cpaA	[O] Posttranslational modification	2.06806	2.69127	0.0062745	0.130632	1
CC_0629	CCNA_00665	GAF-family sensor histidine kinase	CCNA_00665	[T] Signal transduction mechanisms	2.30154	2.45609	0.554581	0.264368	0
CC_1025	CCNA_01077	Penicillin acylase	CCNA_01077	[R] General function prediction only	1.88979	2.19067	0.62557	0.233979	0
CC_1536	CCNA_01605	NADPH-dependent FMN reductase family protein	CCNA_01605	[R] General function prediction only	1.84409	2.20087	0.442977	0.560144	0
CC_2746	CCNA_02832	Microsomal dipeptidase	CCNA_02832	[E] Amino acid transport and metabolism	2.0263	2.40352	0.0899881	0.301934	0
CC_0994	CCNA_01046	Peptide methionine sulfoxide reductase msrA	CCNA_01046	[O] Posttranslational modification	2.11586	2.63376	0.377475	0.618269	1
CC_2234	CCNA_02317	Conserved hypothetical protein	CCNA_02317	Not classified	1.43549	2.12961	0.0533682	0.278191	0
CC_2882	CCNA_02976	hypothetical protein	CCNA_02976	Not classified	2.10023	1.44273	0.196267	0.0649871	1
CC_0063	CCNA_00061	Cytochrome p450	CCNA_00061	[Q] Secondary metabolites biosynthesis	2.21831	1.84936	0.899983	0.0131404	0
CC_0112	CCNA_00111	Conserved hypothetical protein	CCNA_00111	Not classified	2.09154	2.49145	0.168522	0.0128019	0
CC_1318	CCNA_01379	Type I secretion outer membrane protein rsaFb	rsaFb	[M] Cell wall/membrane/envelope biogenesis	2.10359	3.2397	0.128201	0.280574	0
CC_2666	CCNA_02749	Hypothetical protein	CCNA_02749	Not classified	2.04501	2.0635	0.205915	0.30038	0
CC_3296	CCNA_03405	Hypothetical protein	CCNA_03405	[S] Function unknown	2.08413	2.63742	0.119162	0.231732	1
CC_1453	CCNA_01520	Conserved hypothetical protein	CCNA_01520	Not classified	2.10374	1.82206	0.37885	0.260018	0
CC_3183	CCNA_03287	Hypothetical transcriptional regulatory protein	CCNA_03287	[K] Transcription	2.07642	3.40422	0.154166	0.799638	0
CC_0903	CCNA_00948	Hypothetical protein	CCNA_00948	Not classified	2.10412	1.69012	0.356377	0.241474	0
CC_0144	CCNA_00143	Tetrapyrrole (Corrin/Porphyrin) methylase family protein	CCNA_00143	[R] General function prediction only	2.06723	2.08867	0.233957	0.120658	0
CC_3363	CCNA_03473	death on curing toxin protein doc	doc	[R] General function prediction only	2.12914	2.11874	0.00215871	0.123022	0
CC_0444	CCNA_00453	Glucosamine-6-phosphate deaminase	CCNA_00453	[M] Cell wall/membrane/envelope biogenesis	2.13753	1.61538	0.0103004	0.510792	0
CC_3182	CCNA_03286	Hypothetical transporter	CCNA_03286	Not classified	2.07089	2.25214	0.189375	0.0583037	0
CC_2888	CCNA_02982	Porin	CCNA_02982	[M] Cell wall/membrane/envelope biogenesis	1.88819	2.09571	0.153671	0.0448053	0
CC_1422	CCNA_01489	Alpha-L-arabinofuranosidase	CCNA_01489	[G] Carbohydrate transport and metabolism	1.95556	2.09591	0.718165	0.058157	0
CC_1965	CCNA_02043	Sugar kinase	CCNA_02043	[G] Carbohydrate transport and metabolism	1.87618	2.10972	0.27685	0.0696914	0
CC_2564	CCNA_02647	Transcriptional regulator	CCNA_02647	[K] Transcription	2.04081	2.40586	0.222769	0.769838	0
CC_3082	CCNA_03178	Transcriptional regulator, MerR family	CCNA_03178	[K] Transcription	1.54564	2.04441	0.0488999	0.153783	0
CC_0024	CCNA_00024	Uroporphyrin-III C-methyltransferase / Precorrin-2 dehydrogenase / Sirohydrochlorin ferrochelatase	CCNA_00024	[H] Coenzyme transport and metabolism	1.79586	2.06211	0.257666	0.202297	0
CC_1057	CCNA_01110	2-dehydro-3-deoxygluconokinase	CCNA_01110	[G] Carbohydrate transport and metabolism	2.03882	2.34558	0.0502606	0.0464375	0
CC_1220	CCNA_01278	histidine phosphotransferase domain protein	CCNA_01278	Not classified	2.04916	2.38863	0.149075	0.0693339	1
CC_0500	CCNA_00534	Conserved hypothetical protein	CCNA_00534	[R] General function prediction only	1.7989	2.08048	0.151952	0.0565212	0
CC_0393	CCNA_00397	Acetolactate synthase	CCNA_00397	[E] Amino acid transport and metabolism	2.14733	2.09166	0.469236	0.306389	0
CC_2713	CCNA_02797	hypothetical protein	CCNA_02797	Not classified	2.05256	1.75142	0.242489	0.522253	0
CC_3559	CCNA_03674	Hypothetical protein	CCNA_03674	Not classified	2.11141	2.79057	0.201092	0.632418	0
CC_3380	CCNA_03491	3-oxoacyl-[acyl-carrier protein] reductase	CCNA_03491	[I] Lipid transport and metabolism	2.11058	1.91696	0.0648949	0.296735	0
CC_3326	CCNA_03435	Putative peptidoglycan binding domain / FecR protein	CCNA_03435	[S] Function unknown	2.38605	2.40169	0.961969	0.00469229	0
CC_2515	CCNA_02600	S-formylglutathione hydrolase	CCNA_02600	[R] General function prediction only	1.72449	2.08923	0.175055	0.0545641	1
CC_1176	CCNA_01234	Metal-dependent hydrolase	CCNA_01234	[R] General function prediction only	1.87674	2.10518	0.235606	0.48779	0
CC_2318	CCNA_02403	ABC transporter permease protein	CCNA_02403	[Q] Secondary metabolites biosynthesis	2.08791	3.58821	0.147414	0.404841	0
CC_1350	CCNA_01412	Acyl-CoA dehydrogenase, short-chain specific	CCNA_01412	[I] Lipid transport and metabolism	1.96824	2.00036	0.192523	0.0406953	0
CC_3698	CCNA_03812	Peroxiredoxin reductase AhpD (NAD(P)H)	CCNA_03812	[S] Function unknown	2.06174	1.79794	0.149279	0.3341	0
CC_0679	CCNA_00718	abortive infection protein	CCNA_00718	Not classified	1.47946	2.08423	0.269105	0.290147	0
CC_0657	CCNA_00694	ATP-dependent DNA helicase	CCNA_00694	[J] Translation	2.10072	2.46439	0.485331	0.240531	0
CC_1243	CCNA_01301	NAD-dependent formate dehydrogenase alpha subunit	CCNA_01301	[C] Energy production and conversion	1.8114	2.07499	0.221073	0.088859	0
CC_2736	CCNA_02822	Transcriptional regulator, MerR family	CCNA_02822	Not classified	2.04167	3.65799	0.138965	0.0404288	0
CC_3053	CCNA_03148	Hypothetical cytosolic protein	CCNA_03148	[S] Function unknown	1.96369	2.3548	0.0911324	0.701803	0
CC_3400	CCNA_03511	Cytochrome c oxidase assembly protein Surf1	surF1	[S] Function unknown	1.72167	2.15782	0.681074	1.09034	0
CC_1593	CCNA_01665	Potassium-transporting ATPase C chain	CCNA_01665	[P] Inorganic ion transport and metabolism	1.97648	2.01741	0.104511	0.174493	0
CC_1063	CCNA_01116	Histidine protein kinase divJ	divJ	[T] Signal transduction mechanisms	1.97503	2.01576	0.218554	0.291965	1
CC_2477	CCNA_02562	Sel1 repeat domain protein	CCNA_02562	[R] General function prediction only	1.48104	2.10356	0.256334	0.165182	1
CC_2513	CCNA_02599	antitoxin protein relB-2	CCNA_02599	[K] Transcription	1.74977	1.93821	0.0424916	0.136033	0
CC_1334	CCNA_01395	Electron transfer flavoprotein-ubiquinone oxidoreductase	CCNA_01395	[C] Energy production and conversion	2.03209	2.35167	0.358578	0.259368	0
CC_0246	CCNA_00246	Cyclohexanol dehydrogenase	CCNA_00246	[I] Lipid transport and metabolism	1.99353	1.98943	0.056888	0.168182	0
CC_2169	CCNA_02251	Methylglutaconyl-CoA hydratase	CCNA_02251	[I] Lipid transport and metabolism	2.00996	2.63318	0.04881	0.167052	0
CC_3153	CCNA_03255	Conserved hypothetical protein	CCNA_03255	[S] Function unknown	1.95291	1.96131	0.230989	0.262533	0
CC_1427	CCNA_01494	Cyclopropane-fatty-acyl-phospholipid synthase	CCNA_01494	[M] Cell wall/membrane/envelope biogenesis	2.01424	2.22313	0.212826	0.136623	0
CC_1983	CCNA_02062	DNA repair protein recN	CCNA_02062	[L] Replication	1.60067	2.17512	0.562451	0.133726	1
CC_2339	CCNA_02424	Transcriptional regulator, TetR family	CCNA_02424	[K] Transcription	2.05723	2.61937	0.477062	0.181318	0
CC_2359	CCNA_02444	N(4)-(beta-N-acetylglucosaminyl)-L-asparaginase	CCNA_02444	[E] Amino acid transport and metabolism	2.0704	1.64247	0.150244	0.384359	0
CC_0891	CCNA_00935	Transcriptional regulator	CCNA_00935	[K] Transcription	1.99347	1.86396	0.0810158	0.528695	0
CC_0983	CCNA_01034	TonB-dependent outer membrane receptor	CCNA_01034	[P] Inorganic ion transport and metabolism	1.32306	1.9938	0.177675	0.358978	1
CC_0127	CCNA_00126	Glutathione S-transferase	CCNA_00126	Not classified	2.17137	2.86327	0.122415	0.280471	0
CC_3224	CCNA_03332	Dihydropteroate synthase	CCNA_03332	[H] Coenzyme transport and metabolism	1.53089	1.98727	0.0204691	0.373441	0
CC_0533	CCNA_00567	Hypothetical protein	CCNA_00567	[G] Carbohydrate transport and metabolism	1.85358	2.00823	0.678531	0.380106	0
CC_2512	CCNA_02598	toxin protein relE-2	CCNA_02598	[R] General function prediction only	2.58625	2.50569	0.749124	0.683767	0
CC_1542	CCNA_01611	Transporter, drug/metabolite exporter family	CCNA_01611	Not classified	1.02973	2.08337	0.0496179	1.02857	0
CC_3311	CCNA_03420	Hypothetical protein	CCNA_03420	Not classified	2.05399	1.98001	0.0132452	0.0666982	0
CC_2101	CCNA_02186	Acetolactate synthase small subunit	CCNA_02186	[E] Amino acid transport and metabolism	2.07623	1.92926	0.425383	0.0739693	0
CC_3367	CCNA_03478	AraC-family transcription regulator ftrA	ftrA	[K] Transcription	1.94775	1.88469	0.216931	0.234884	0
CC_0693	CCNA_00729	Hypothetical protein	CCNA_00729	Not classified	2.21303	1.85278	0.872325	0.324893	0
CC_1245	CCNA_01303	Conserved hypothetical protein	CCNA_01303	Not classified	1.93014	1.86104	0.000270709	0.27072	0
CC_0628	CCNA_00664	C4-dicarboxylate transport protein	CCNA_00664	[C] Energy production and conversion	1.99913	2.18623	0.379435	0.514838	1
CC_3522	CCNA_03637	Putative adenylate cyclase family	CCNA_03637	[S] Function unknown	1.29193	2.0877	0.138536	0.0493531	0
CC_2092	CCNA_02174	Multidrug resistance efflux pump	CCNA_02174	[V] Defense mechanisms	1.80591	1.97788	0.394654	0.0562372	0
CC_1211	CCNA_01269	Hypothetical protein	CCNA_01269	[S] Function unknown	1.99756	2.50267	0.412519	0.195728	1
CC_1701	CCNA_01773	SNARE-associated family membrane protein	CCNA_01773	[S] Function unknown	2.04675	1.68896	0.37653	0.359511	1
CC_0813	CCNA_00856	Beta-xylosidase	CCNA_00856	[G] Carbohydrate transport and metabolism	1.97918	1.87913	0.146763	0.33223	0
CC_3246	CCNA_03355	Acylamino-acid-releasing enzyme	CCNA_03355	[E] Amino acid transport and metabolism	1.40461	2.02518	0.263742	0.0559067	0
CC_3169	CCNA_03270	Transcriptional regulator, AsnC family	CCNA_03270	[K] Transcription	1.82926	2.00863	0.0446511	0.317705	0
CC_3019	CCNA_03113	Membrane-associated phospholipid phosphatase	CCNA_03113	[I] Lipid transport and metabolism	1.7798	2.08065	0.029596	0.104568	1
CC_0751	CCNA_00788	Transporter, MFS superfamily	CCNA_00788	[G] Carbohydrate transport and metabolism	1.66633	2.02889	0.180734	0.27254	0
CC_0729	CCNA_00766	Cobalamin adenosyltransferase family protein	CCNA_00766	[S] Function unknown	1.98091	3.02531	0.156729	0.537004	0
CC_3476	CCNA_03590	Conserved hypothetical protein	CCNA_03590	Not classified	0.976891	2.0407	0.191256	0.124821	1
CC_3255	CCNA_03364	Hypothetical protein	CCNA_03364	[S] Function unknown	1.17414	2.02892	0.213302	0.814591	1

## Sheet: downregulated transcripts
Gene ID CB15	Gene ID NA1000	Annotation	Gene Name	COG	Average 30 min -G/+G	Average 60 min -G/+G	Std. Dev 30 min -G/+G	Std. Dev 60 min -G/+G	Cell cycle regulated mRNA? (Laub et. al., 2000) (1=yes; 0=no)
CC_3197	CCNA_03301	Cation/multidrug efflux pump acrB	acrB	[V] Defense mechanisms	0.209112	0.204459	0.0159514	0.00654423	0
CC_1269	CCNA_01327	Adenylate kinase / Nucleoside-diphosphate kinase	adk	[F] Nucleotide transport and metabolism	0.265765	0.264673	0.00928303	0.00607481	1
CC_0007	CCNA_00007	SSU ribosomal protein S20P	CCNA_00007	[J] Translation	0.0724748	0.0643936	0.00462683	0.0153747	1
CC_0026	CCNA_00026	PAS-family sensor histidine kinase	CCNA_00026	[K] Transcription	0.341702	0.374701	0.0666095	0.0695333	0
CC_0027	CCNA_00027	2OG-Fe(II) oxygenase	CCNA_00027	[S] Function unknown	0.468804	0.387718	0.0122412	0.0731008	1
CC_0028	CCNA_00028	TonB-dependent receptor	CCNA_00028	[P] Inorganic ion transport and metabolism	0.0239929	0.0172491	0.00129493	0.000464688	0
CC_0034	CCNA_00033	Polyribonucleotide nucleotidyltransferase / Polynucleotide adenylyltransferase	CCNA_00033	[J] Translation	0.281635	0.307601	0.063447	0.0324433	0
CC_0035	CCNA_00034	SSU ribosomal protein S15P	CCNA_00034	[J] Translation	0.070193	0.0627128	0.0187679	0.0122241	0
CC_0036	CCNA_00035	tRNA pseudouridine synthase B	CCNA_00035	[J] Translation	0.199373	0.334314	0.00607285	0.103215	0
CC_0037	CCNA_00036	Ribosome-binding factor A	CCNA_00036	[J] Translation	0.407134	0.482547	0.0638166	0.118997	0
CC_0042	CCNA_00041	Bacterial Protein Translation Initiation Factor 2 (IF-2)	CCNA_00041	[J] Translation	0.158482	0.148345	0.0207074	0.0152168	0
CC_0044	CCNA_00043	N utilization substance protein A	CCNA_00043	[K] Transcription	0.336189	0.344364	0.0361989	0.00518588	0
CC_0045	CCNA_00044	Hypothetical cytosolic protein	CCNA_00044	[S] Function unknown	0.294043	0.2585	0.0442659	0.0239089	0
CC_0047	CCNA_00045	Inorganic pyrophosphatase	CCNA_00045	[C] Energy production and conversion	0.0563777	0.063341	0.00383795	0.00246236	0
CC_0049	CCNA_00047	tRNA G46) methyltransferase	CCNA_00047	[R] General function prediction only	0.219873	0.322762	0.0432555	0.040068	0
CC_0052	CCNA_00050	Apolipoprotein N-acyltransferase	CCNA_00050	[M] Cell wall/membrane/envelope biogenesis	0.381743	0.434505	0.163589	0.00898504	0
CC_0054	CCNA_00052	Predicted metal-dependent hydrolase	CCNA_00052	[R] General function prediction only	0.399387	0.458418	0.158626	0.329692	0
CC_0056	CCNA_00054	tRNA 2-methylthioadenosine synthase	CCNA_00054	[J] Translation	0.34846	0.395762	0.0939867	0.0383159	0
CC_0059	CCNA_00057	Glycoprotease family protein	CCNA_00057	[O] Posttranslational modification	0.480526	0.604109	0.0705997	0.0728267	0
CC_0085	CCNA_00083	Phosphoglucomutase / Phosphomannomutase	CCNA_00083	[G] Carbohydrate transport and metabolism	0.477656	0.477441	0.0643213	0.00148637	0
CC_0105	CCNA_00104	Orotidine 5'-phosphate decarboxylase	CCNA_00104	[F] Nucleotide transport and metabolism	0.316919	0.34804	0.0261094	0.00258987	0
CC_0107	CCNA_00106	2-polyprenyl-6-methoxyphenol hydroxylase	CCNA_00106	[C] Energy production and conversion	0.358576	0.485149	0.0876082	0.0335594	0
CC_0111	CCNA_00110	DNA-binding protein	CCNA_00110	[S] Function unknown	0.514458	0.47988	0.109911	0.184172	0
CC_0116	CCNA_00115	TolB protein	CCNA_00115	[Q] Secondary metabolites biosynthesis	0.444153	0.419611	0.0965501	0.0223167	1
CC_0129	CCNA_00128	Argininosuccinate synthase	CCNA_00128	[E] Amino acid transport and metabolism	0.0872396	0.0973976	0.0030344	0.0129048	0
CC_0131	CCNA_00130	Kup system potassium uptake protein	CCNA_00130	[P] Inorganic ion transport and metabolism	0.214862	0.329322	0.0420308	0.103453	0
CC_0134	CCNA_00133	Radical SAM family enzyme	CCNA_00133	[R] General function prediction only	0.190156	0.277162	0.0475592	0.107379	0
CC_0139	CCNA_00138	Iron(III) dicitrate transport protein fecA	CCNA_00138	[P] Inorganic ion transport and metabolism	0.389338	0.263193	0.169894	0.00361594	1
CC_0152	CCNA_00151	Ribonuclease PH	CCNA_00151	[J] Translation	0.189642	0.265749	0.08447	0.0575557	0
CC_0163	CCNA_00162	Conserved hypothetical protein	CCNA_00162	[S] Function unknown	0.213658	0.313605	0.00154921	0.050125	1
CC_0164	CCNA_00163	Chain length regulator (capsular polysaccharide biosynthesis) / Tyrosine-protein kinase (capsular polysaccharide biosynthesis)	CCNA_00163	[D] Cell cycle control	0.357002	0.440802	0.00885422	0.0678641	0
CC_0165	CCNA_00164	O-antigen polymerase	CCNA_00164	[M] Cell wall/membrane/envelope biogenesis	0.211792	0.275934	0.0579616	0.0539517	0
CC_0189	CCNA_00189	Hypothetical cytosolic protein	CCNA_00189	[S] Function unknown	0.463352	0.550106	0.00434945	0.0703502	0
CC_0190	CCNA_00190	Acyl-CoA hydrolase	CCNA_00190	[I] Lipid transport and metabolism	0.221218	0.326259	0.0418106	0.054039	0
CC_0194	CCNA_00194	Hypothetical cytosolic protein	CCNA_00194	[S] Function unknown	0.397152	0.389057	0.0345404	0.0241379	0
CC_0202	CCNA_00202	DesA-family fatty acid desaturase	CCNA_00202	[I] Lipid transport and metabolism	0.371567	0.541093	0.0708927	0.0606337	1
CC_0210	CCNA_00210	TonB-dependent receptor	CCNA_00210	[P] Inorganic ion transport and metabolism	0.272949	0.301338	0.0252015	0.00817951	0
CC_0211	CCNA_00211	Agmatine deiminase	CCNA_00211	[E] Amino acid transport and metabolism	0.104462	0.108255	0.00891961	0.0130604	0
CC_0212	CCNA_00212	N-carbamoylputrescine amidase	CCNA_00212	[R] General function prediction only	0.243716	0.236555	0.000529321	0.00437597	0
CC_0214	CCNA_00214	TonB-dependent receptor	CCNA_00214	[P] Inorganic ion transport and metabolism	0.523025	0.513334	0.343316	0.525679	0
CC_0215	CCNA_00215	Hypothetical cytosolic protein	CCNA_00215	Not classified	0.0384269	0.0580409	0.00194268	3.41719e-05	1
CC_0218	CCNA_00218	Hypothetical protein	CCNA_00218	Not classified	0.459092	0.457254	0.0123214	0.0339827	0
CC_0220	CCNA_00220	Thiol-disulfide isomerase and thioredoxins	CCNA_00220	[O] Posttranslational modification	0.401569	0.416361	0.0296036	0.0354598	0
CC_0240	CCNA_00240	PTS system, IIA component	CCNA_00240	[G] Carbohydrate transport and metabolism	0.299426	0.41253	0.0283139	0.193735	0
CC_0249	CCNA_00249	SCO1/SenC family protein	CCNA_00249	[R] General function prediction only	0.465843	0.478376	0.0970691	0.047572	0
CC_0253	CCNA_00253	Aspartate-semialdehyde dehydrogenase	CCNA_00253	[E] Amino acid transport and metabolism	0.137679	0.187113	0.0229441	0.00924869	1
CC_0255	CCNA_00255	Esterase	CCNA_00255	[V] Defense mechanisms	0.416368	0.440755	0.11118	0.0410858	0
CC_0256	CCNA_00256	Pyridoxine kinase	CCNA_00256	[H] Coenzyme transport and metabolism	0.464341	0.403324	0.149153	0.0275049	0
CC_0257	CCNA_00257	Adenosylhomocysteinase	CCNA_00257	[H] Coenzyme transport and metabolism	0.0193645	0.0204769	0.00169946	0.000956136	0
CC_0272	CCNA_00273	Peptide deformylase	CCNA_00273	[J] Translation	0.509932	0.515535	0.130422	0.00865426	0
CC_0278	CCNA_00280	tRNA pseudouridine synthase A	CCNA_00280	[J] Translation	0.385664	0.416411	0.0160202	0.138746	0
CC_0279	CCNA_00281	Methionyl-tRNA formyltransferase	CCNA_00281	[J] Translation	0.434108	0.441926	0.00863053	0.130689	0
CC_0281	CCNA_00283	2,3,4,5-tetrahydropyridine-2-carboxylate N-succinyltransferase	CCNA_00283	[E] Amino acid transport and metabolism	0.229543	0.419357	0.0236375	0.031089	0
CC_0282	CCNA_00284	Hydrolase (HAD superfamily)	CCNA_00284	[R] General function prediction only	0.0939707	0.0903318	0.0240633	0.0358438	0
CC_0283	CCNA_00285	Acetylglutamate kinase	CCNA_00285	[E] Amino acid transport and metabolism	0.0550354	0.0584566	0.00230091	0.0197983	0
CC_0286	CCNA_00288	Sulfate-binding protein	CCNA_00288	[P] Inorganic ion transport and metabolism	0.151551	0.230667	0.0313578	0.0134345	0
CC_0287	CCNA_00289	Hypothetical protein	CCNA_00289	Not classified	0.229813	0.358467	0.0552278	0.00950092	0
CC_0288	CCNA_00290	Autotransporter protein	CCNA_00290	Not classified	0.239767	0.245972	0.0437538	0.0180834	0
CC_0297	CCNA_00299	Phosphoribosylamine--glycine ligase	CCNA_00299	[F] Nucleotide transport and metabolism	0.188334	0.226186	0.0306365	0.0164215	0
CC_0313	CCNA_00315	3-polyprenyl-4-hydroxybenzoate decarboxylase	CCNA_00315	[H] Coenzyme transport and metabolism	0.533909	0.524759	0.240102	0.148211	0
CC_0318	CCNA_00320	LSU ribosomal protein L27P	CCNA_00320	[J] Translation	0.0833252	0.103521	0.0139178	0.0110738	0
CC_0319	CCNA_00321	LSU ribosomal protein L21P	CCNA_00321	[J] Translation	0.0848698	0.115353	0.00282157	0.0149791	0
CC_0323	CCNA_00326	Vegetatible incompatibility protein HET-E-1	CCNA_00326	[R] General function prediction only	0.471265	0.557066	0.115085	0.166595	0
CC_0330	CCNA_00333	LytTr DNA-binding domain	CCNA_00333	[K] Transcription	0.485369	0.592272	0.0225396	0.0249116	0
CC_0334	CCNA_00337	Transcriptional regulator, TetR family	CCNA_00337	[K] Transcription	0.417827	0.655844	0.0879857	0.154265	0
CC_0337	CCNA_00340	Succinyl-CoA synthetase beta chain	CCNA_00340	[C] Energy production and conversion	0.218585	0.23836	0.0257709	0.0426414	0
CC_0342	CCNA_00346	Dihydrolipoamide dehydrogenase	CCNA_00346	[C] Energy production and conversion	0.329188	0.398983	0.00869159	0.061792	0
CC_0347	CCNA_00352	Integral membrane protein	CCNA_00352	[P] Inorganic ion transport and metabolism	0.210801	0.20671	0.0191724	0.00604104	0
CC_0350	CCNA_00355	Hypothetical protein with pentapeptide repeats	CCNA_00355	[S] Function unknown	0.534844	0.587365	0.0690599	0.0363152	1
CC_0359	CCNA_00364	Deoxyhypusine synthase	CCNA_00364	[O] Posttranslational modification	0.0778331	0.0995252	0.0159928	0.00247773	0
CC_0360	CCNA_00365	Ornithine decarboxylase	CCNA_00365	[E] Amino acid transport and metabolism	0.209499	0.366571	0.0217527	0.0654652	0
CC_0361	CCNA_00366	Phosphonates transport ATP-binding protein phnC	CCNA_00366	[P] Inorganic ion transport and metabolism	0.373683	0.412701	0.0107006	0.0407655	1
CC_0362	CCNA_00367	Phosphonates-binding protein	CCNA_00367	[P] Inorganic ion transport and metabolism	0.288866	0.262683	0.000175803	0.00436009	1
CC_0363	CCNA_00368	Phosphonates transport system permease protein phnE	CCNA_00368	[P] Inorganic ion transport and metabolism	0.352602	0.327789	0.0740909	0.0693311	1
CC_0365	CCNA_00370	ATP synthase B chain	CCNA_00370	[C] Energy production and conversion	0.139631	0.140101	0.00590984	0.0178765	0
CC_0366	CCNA_00371	ATP synthase B' chain	CCNA_00371	[C] Energy production and conversion	0.10359	0.0959858	0.00102762	0.00727052	0
CC_0367	CCNA_00372	ATP synthase C chain	CCNA_00372	Not classified	0.194506	0.179872	0.0453709	0.0208625	0
CC_0368	CCNA_00373	ATP synthase A chain	CCNA_00373	[C] Energy production and conversion	0.0458253	0.0423436	0.00281	0.0075047	0
CC_0369	CCNA_00374	Putative ATP synthase protein I	CCNA_00374	[S] Function unknown	0.0656044	0.0721939	0.0266819	0.0265281	1
CC_0371	CCNA_00375	Conserved hypothetical protein	CCNA_00375	Not classified	0.0804051	0.0828987	0.031057	0.0149979	0
CC_0374	CCNA_00378	Thiol:disulfide interchange protein dsbA	CCNA_00378	[O] Posttranslational modification	0.345477	0.363533	0.0997691	0.106893	0
CC_0375	CCNA_00379	Thiol:disulfide interchange protein dsbA	CCNA_00379	[O] Posttranslational modification	0.504285	0.541629	0.00533574	0.0289621	0
CC_0394	CCNA_00398	Hypothetical protein	CCNA_00398	Not classified	0.330315	0.365047	0.0608992	0.0464949	0
CC_0403	CCNA_00408	Macrolide-efflux protein	CCNA_00408	Not classified	0.381476	0.563743	0.014976	0.0352597	0
CC_0408	CCNA_00413	Poly(A) polymerase / tRNA-nucleotidyltransferase	CCNA_00413	[J] Translation	0.471663	0.582579	0.0248441	0.00998389	0
CC_0417	CCNA_00422	3-oxoacyl-[acyl-carrier protein] reductase	CCNA_00422	[I] Lipid transport and metabolism	0.259337	0.42616	0.054148	0.0229612	0
CC_0458	CCNA_00490	Hypothetical protein	CCNA_00490	[S] Function unknown	0.445358	0.577805	0.093325	0.153105	0
CC_0460	CCNA_00492	Cysteinyl-tRNA synthetase	CCNA_00492	[J] Translation	0.483715	0.445982	0.114035	0.102792	0
CC_0463	CCNA_00495	Hypothetical cytosolic protein	CCNA_00495	[S] Function unknown	0.371553	0.593606	0.00988494	0.0451467	0
CC_0464	CCNA_00496	Threonyl-tRNA synthetase	CCNA_00496	[J] Translation	0.344443	0.667604	0.0477754	0.00312908	0
CC_0471	CCNA_00504	23S rRNA methyltransferase	CCNA_00504	[J] Translation	0.225423	0.297268	0.0058672	0.00501797	0
CC_0472	CCNA_00505	Ubiquinol-cytochrome c reductase iron-sulfur subunit	CCNA_00505	[C] Energy production and conversion	0.271041	0.268635	0.0435851	0.0311329	0
CC_0473	CCNA_00506	Cytochrome b	CCNA_00506	[C] Energy production and conversion	0.447885	0.493128	0.0261154	0.00244319	0
CC_0474	CCNA_00507	Cytochrome c1	CCNA_00507	[C] Energy production and conversion	0.373111	0.441829	0.0182557	0.0860167	1
CC_0479	CCNA_00512	GTP-binding protein, probable translation factor	CCNA_00512	[J] Translation	0.329601	0.372434	0.03754	0.0437969	0
CC_0482	CCNA_00515	5-methyltetrahydropteroyltriglutamate--homocysteine methyltransferase	CCNA_00515	[E] Amino acid transport and metabolism	0.050069	0.0422713	0.00705916	0.00833299	1
CC_0484	CCNA_00517	Peptidyl-tRNA hydrolase	CCNA_00517	[J] Translation	0.431297	0.516612	0.0940607	0.0175566	1
CC_0485	CCNA_00518	LSU ribosomal protein L25P	CCNA_00518	[J] Translation	0.0492026	0.0405508	0.00945947	0.000608146	0
CC_0486	CCNA_00519	Conserved hypothetical protein	CCNA_00519	Not classified	0.373411	0.396164	0.0654311	0.0047627	0
CC_0487	CCNA_00520	Ribose-phosphate pyrophosphokinase	CCNA_00520	[E] Amino acid transport and metabolism	0.134273	0.168873	0.0135673	0.0227162	0
CC_0490	CCNA_00523	Multicopper polyphenol oxidase	CCNA_00523	[S] Function unknown	0.531022	0.619565	0.0782293	0.0579413	0
CC_0491	CCNA_00524	Conserved hypothetical cytosolic protein	CCNA_00524	[S] Function unknown	0.479731	0.580341	0.0512546	0.0508972	0
CC_0496	CCNA_00530	LSU ribosomal protein L10P	CCNA_00530	[J] Translation	0.0303362	0.01872	0.00449608	0.00380274	1
CC_0497	CCNA_00531	LSU ribosomal protein L12P (L7/L12)	CCNA_00531	[J] Translation	0.0478643	0.0269629	0.00393201	0.00183935	0
CC_0502	CCNA_00536	DNA-directed RNA polymerase beta chain	CCNA_00536	[K] Transcription	0.084559	0.101621	0.0102969	0.00383867	1
CC_0503	CCNA_00537	DNA-directed RNA polymerase beta' chain	CCNA_00537	[K] Transcription	0.139075	0.116381	0.0232232	0.0312312	0
CC_0512	CCNA_00546	Conserved hypothetical protein	CCNA_00546	Not classified	0.599192	0.447049	0.104202	0.101185	0
CC_0524	CCNA_00558	Methyltransferase	CCNA_00558	[H] Coenzyme transport and metabolism	0.413718	0.455201	0.0131102	0.0973094	0
CC_0548	CCNA_00583	Hypothetical protein	CCNA_00583	[S] Function unknown	0.347732	0.360501	0.0665677	0.0264922	0
CC_0565	CCNA_00600	Conserved hypothetical protein	CCNA_00600	Not classified	0.3454	0.430252	0.0348494	0.0559001	0
CC_0566	CCNA_00601	MoxR-like ATPases	CCNA_00601	[R] General function prediction only	0.287707	0.419927	0.048523	0.0376473	0
CC_0567	CCNA_00602	Hypothetical exported protein	CCNA_00602	[R] General function prediction only	0.424752	0.499071	0.137164	0.00444557	0
CC_0569	CCNA_00604	Hypothetical membrane spanning protein	CCNA_00604	[S] Function unknown	0.311449	0.416013	0.100712	0.0340717	0
CC_0599	CCNA_00635	Hypothetical protein	CCNA_00635	Not classified	0.279556	0.295678	0.079708	0.0491363	0
CC_0600	CCNA_00636	Hypothetical protein	CCNA_00636	Not classified	0.190171	0.173676	0.0400922	0.02864	0
CC_0640	CCNA_00677	LSU ribosomal protein L1P	CCNA_00677	[J] Translation	0.0412128	0.0371909	0.000350658	0.0101822	0
CC_0641	CCNA_00678	LSU ribosomal protein L11P	CCNA_00678	[J] Translation	0.0516623	0.0405305	0.00996062	0.00504587	1
CC_0653	CCNA_00690	CarD-like transcriptional regulator	CCNA_00690	[K] Transcription	0.122758	0.222067	0.00786467	0.00967602	0
CC_0654	CCNA_00691	Ferredoxin	CCNA_00691	[C] Energy production and conversion	0.0534441	0.0764117	0.0107479	0.00874129	0
CC_0661	CCNA_00699	LSU ribosomal protein L28P	CCNA_00699	[J] Translation	0.106483	0.118157	0.00342453	0.00362195	0
CC_0669	CCNA_00705	Hypothetical protein	CCNA_00705	Not classified	0.311677	0.260545	0.0763688	0.0158687	1
CC_0671	CCNA_00707	Hypothetical membrane associated protein	CCNA_00707	[S] Function unknown	0.519898	0.519127	0.0390509	0.0341349	0
CC_0684	CCNA_00720	Type I protein secretion ATP-binding protein / Type I protein secretion transmembrane subunit / Type I secretion processing peptidase	CCNA_00720	[V] Defense mechanisms	0.164384	0.190342	0.0704388	0.0359563	0
CC_0685	CCNA_00721	chaperonin GroEL	CCNA_00721	[O] Posttranslational modification	0.183101	0.0584366	0.0336115	0.00666602	1
CC_0686	CCNA_00722	chaperonin GroES	CCNA_00722	[O] Posttranslational modification	0.218115	0.0804907	0.0381749	0.00222177	1
CC_0699	CCNA_00735	Conserved hypothetical protein	CCNA_00735	Not classified	0.265417	0.260204	0.0044349	0.0239371	0
CC_0700	CCNA_00736	Lipoprotein signal peptidase	CCNA_00736	[M] Cell wall/membrane/envelope biogenesis	0.416016	0.65425	0.0378553	0.125508	0
CC_0701	CCNA_00737	Isoleucyl-tRNA synthetase	CCNA_00737	[J] Translation	0.19985	0.261774	0.0231015	0.01061	0
CC_0703	CCNA_00740	Riboflavin kinase / FMN adenylyltransferase	CCNA_00740	[H] Coenzyme transport and metabolism	0.490463	0.593101	0.102349	0.0109257	0
CC_0705	CCNA_00742	Hydrolase (HAD superfamily)	CCNA_00742	[G] Carbohydrate transport and metabolism	0.446336	0.470698	0.11642	0.0279218	1
CC_0711	CCNA_00748	Ferrous iron transport protein A	CCNA_00748	[P] Inorganic ion transport and metabolism	0.183231	0.217232	0.0226779	0.0261821	0
CC_0712	CCNA_00749	Ferrous iron transport protein B	CCNA_00749	[P] Inorganic ion transport and metabolism	0.189765	0.196937	0.0177288	0.028375	0
CC_0716	CCNA_00753	Lysien 2,3-aminomutase	CCNA_00753	[E] Amino acid transport and metabolism	0.491864	0.565674	0.0924707	0.0238534	0
CC_0721	CCNA_00758	Protein Translation Elongation Factor P (EF-P)	CCNA_00758	[J] Translation	0.156081	0.149863	0.000501034	0.00179925	0
CC_0741	CCNA_00778	GTP-binding protein TypA/BipA	CCNA_00778	[T] Signal transduction mechanisms	0.0461887	0.0720684	0.00807737	0.00898577	1
CC_0745	CCNA_00782	Aminobenzoyl-glutamate transport protein	CCNA_00782	[H] Coenzyme transport and metabolism	0.482995	0.390822	0.157907	0.0355889	0
CC_0765	CCNA_00804	Hypothetical protein	CCNA_00804	Not classified	0.422439	0.417435	0.0939698	0.0977522	0
CC_0768	CCNA_00807	Ribonuclease P protein component	CCNA_00807	[J] Translation	0.199589	0.26485	0.00938404	0.00730168	0
CC_0797	CCNA_00839	Glucan 1,4-beta-glucosidase	CCNA_00839	[G] Carbohydrate transport and metabolism	0.217728	0.220273	0.0499964	0.00106102	0
CC_0798	CCNA_00840	Sialic acid-specific 9-O-acetylesterase	CCNA_00840	Not classified	0.328668	0.489343	0.0616607	0.018627	0
CC_0835	CCNA_00878	ATP-dependent RNA helicase	CCNA_00878	[J] Translation	0.418623	0.435464	0.180321	0.193673	0
CC_0838	CCNA_00881	ABC transporter ATP-binding protein	CCNA_00881	[V] Defense mechanisms	0.462845	0.666936	0.0305635	0.0436668	0
CC_0840	CCNA_00883	3-demethylubiquinone 3-methyltransferase	CCNA_00883	[H] Coenzyme transport and metabolism	0.478304	0.664682	0.125074	0.109446	0
CC_0843	CCNA_00886	Aspartokinase	CCNA_00886	[E] Amino acid transport and metabolism	0.0471532	0.0579273	0.0015737	0.00335797	0
CC_0846	CCNA_00889	Conserved hypothetical protein	CCNA_00889	Not classified	0.295294	0.283271	0.0331527	0.0149166	0
CC_0855	CCNA_00898	Ribosomal large subunit pseudouridine synthase F	CCNA_00898	[J] Translation	0.491756	0.557759	0.018856	0.0463718	0
CC_0856	CCNA_00899	Bacterial Peptide Chain Release Factor 1 (RF-1)	CCNA_00899	[J] Translation	0.215726	0.256686	0.0682733	0.0603795	0
CC_0875	CCNA_00918	Peptide release factor-glutamine N5-methyltransferase	CCNA_00918	[J] Translation	0.305606	0.404672	0.058595	0.069405	0
CC_0876	CCNA_00920	Hypothetical cytosolic protein	CCNA_00920	Not classified	0.0976132	0.106096	0.00942164	0.0217875	0
CC_0920	CCNA_00968	Gluconate kinase	CCNA_00968	[S] Function unknown	0.293892	0.46906	0.0346475	0.0373291	0
CC_0925	CCNA_00974	OAR protein precursor	CCNA_00974	[P] Inorganic ion transport and metabolism	0.343182	0.479975	0.000569883	0.0504848	1
CC_0949	CCNA_00998	Transcriptional regulator	CCNA_00998	[K] Transcription	0.136383	0.181629	0.0136541	0.0264783	0
CC_0970	CCNA_01021	TonB-dependent receptor	CCNA_01021	[P] Inorganic ion transport and metabolism	0.316723	0.380886	0.0173747	0.0811153	0
CC_0998	CCNA_01050	ABC transporter ATP-binding protein	CCNA_01050	[R] General function prediction only	0.289654	0.330992	0.0150186	0.0843719	0
CC_1010	CCNA_01062	GDP-mannose 4,6 dehydratase	CCNA_01062	[M] Cell wall/membrane/envelope biogenesis	0.289041	0.354428	0.0445851	0.0782668	0
CC_1011	CCNA_01063	Putative UDP-perosamine 4-acetyl transferase	CCNA_01063	[R] General function prediction only	0.446626	0.548362	0.0263772	0.0840716	0
CC_1012	CCNA_01064	Perosamine synthetase	CCNA_01064	[M] Cell wall/membrane/envelope biogenesis	0.199256	0.286518	0.0252774	0.0662717	0
CC_1013	CCNA_01065	Glycosyltransferase	CCNA_01065	[M] Cell wall/membrane/envelope biogenesis	0.262618	0.285275	0.108415	0.0159032	0
CC_1014	CCNA_01066	Glycosyltransferase	CCNA_01066	[M] Cell wall/membrane/envelope biogenesis	0.438023	0.434452	0.127526	0.133816	0
CC_1017	CCNA_01069	Methyltransferase	CCNA_01069	Not classified	0.416386	0.495085	0.0365986	0.0131894	0
CC_1043	CCNA_01095	Phenylalanyl-tRNA synthetase beta chain	CCNA_01095	[J] Translation	0.234056	0.27165	0.0122827	0.0447822	0
CC_1044	CCNA_01096	Phenylalanyl-tRNA synthetase alpha chain	CCNA_01096	[J] Translation	0.17415	0.208289	0.00682805	0.00793988	0
CC_1045	CCNA_01097	LSU ribosomal protein L20P	CCNA_01097	[J] Translation	0.0843476	0.079124	0.0200512	0.000429268	0
CC_1046	CCNA_01098	LSU ribosomal protein L35P	CCNA_01098	[J] Translation	0.055245	0.0575583	0.00230359	0.00758276	0
CC_1070	CCNA_01123	Bacterial Peptide Chain Release Factor 3 (RF-3)	CCNA_01123	[J] Translation	0.33934	0.327861	0.0562807	0.0996912	0
CC_1089	CCNA_01143	Translation initiation inhibitor	CCNA_01143	[J] Translation	0.266165	0.263514	0.0248252	0.0104597	1
CC_1103	CCNA_01159	Transporter, MFS superfamily	CCNA_01159	[G] Carbohydrate transport and metabolism	0.031245	0.039865	0.00227921	0.00252017	0
CC_1105	CCNA_01162	Beta-glucosidase	CCNA_01162	[G] Carbohydrate transport and metabolism	0.41698	0.675892	0.0676297	0.163236	1
CC_1116	CCNA_01173	Chorismate mutase	CCNA_01173	[E] Amino acid transport and metabolism	0.392499	0.445109	0.0945466	0.0418502	0
CC_1118	CCNA_01175	Uroporphyrin-III C-methyltransferase	CCNA_01175	[H] Coenzyme transport and metabolism	0.318999	0.478169	0.0297046	0.0165166	0
CC_1119	CCNA_01177	Sulfite reductase (Ferredoxin)	CCNA_01177	[P] Inorganic ion transport and metabolism	0.0420364	0.0594147	0.00539365	0.0191218	0
CC_1120	CCNA_01178	Oxidoreductase	CCNA_01178	[S] Function unknown	0.0870631	0.231963	0.0189646	0.00400586	1
CC_1121	CCNA_01179	Phosphoadenosine phosphosulfate reductase	CCNA_01179	[E] Amino acid transport and metabolism	0.0764025	0.15226	0.00657022	0.0425358	1
CC_1129	CCNA_01187	RNA polymerase ECF-type sigma factor	SigC	[K] Transcription	0.546284	0.693551	0.0958322	0.0556495	1
CC_1130	CCNA_01188	FecR family protein	CCNA_01188	[P] Inorganic ion transport and metabolism	0.459802	0.710155	0.0548455	0.157786	0
CC_1152	CCNA_01210	Nucleotidyltransferase family protein	CCNA_01210	[M] Cell wall/membrane/envelope biogenesis	0.415493	0.564259	0.00556706	0.0134724	0
CC_1153	CCNA_01211	Conserved hypothetical protein	CCNA_01211	Not classified	0.32892	0.406366	0.0478306	0.108811	0
CC_1154	CCNA_01212	dATP pyrophosphohydrolase	CCNA_01212	Not classified	0.283296	0.345287	0.0288044	0.0816039	0
CC_1155	CCNA_01213	Hypothetical membrane spanning protein	CCNA_01213	[R] General function prediction only	0.384975	0.405787	0.0818804	0.000917134	0
CC_1156	CCNA_01214	Hypothetical membrane spanning protein	CCNA_01214	[R] General function prediction only	0.226593	0.333921	0.0306486	0.125834	0
CC_1157	CCNA_01215	Histidine triad (HIT) protein	CCNA_01215	[F] Nucleotide transport and metabolism	0.271817	0.341488	0.0337739	0.106515	0
CC_1164	CCNA_01222	NADH-ubiquinone oxidoreductase	CCNA_01222	[G] Carbohydrate transport and metabolism	0.313326	0.388528	0.07378	0.018051	0
CC_1165	CCNA_01223	Acyl-CoA synthetase	CCNA_01223	[I] Lipid transport and metabolism	0.290811	0.283753	0.0446856	0.0561179	0
CC_1167	CCNA_01225	Glycerophosphotransferase-related protein	CCNA_01225	[M] Cell wall/membrane/envelope biogenesis	0.394897	0.605965	0.0425205	0.108521	0
CC_1184	CCNA_01242	Amino acid permease	CCNA_01242	[E] Amino acid transport and metabolism	0.178788	0.208727	0.0177463	0.00477057	1
CC_1203	CCNA_01261	Periplasmic multidrug efflux lipoprotein precursor	CCNA_01261	[M] Cell wall/membrane/envelope biogenesis	0.475077	0.581024	0.0388368	0.00755951	0
CC_1215	CCNA_01273	EMG2 protein	CCNA_01273	[S] Function unknown	0.543067	0.500305	0.100482	0.0942872	0
CC_1239	CCNA_01297	23S rRNA Gm2251 methyltransferase	CCNA_01297	[J] Translation	0.37342	0.562963	0.0377629	0.025161	0
CC_1246	CCNA_01304	Hypothetical protein	CCNA_01304	Not classified	0.0175222	0.0201597	0.000797954	0.00198287	0
CC_1288	CCNA_01347	Conserved hypothetical protein	CCNA_01347	Not classified	0.183046	0.273453	0.0356377	0.0274728	0
CC_1313	CCNA_01372	Lysine decarboxylase family	CCNA_01372	[R] General function prediction only	0.27826	0.404805	0.0380091	0.0761635	0
CC_1316	CCNA_01376	Glutathione S-transferase	CCNA_01376	[O] Posttranslational modification	0.509783	0.580276	0.0169597	0.00855143	1
CC_1317	CCNA_01378	Protein-L-isoaspartate O-methyltransferase	CCNA_01378	[O] Posttranslational modification	0.460217	0.57396	0.0695661	0.127997	0
CC_1320	CCNA_01381	Valyl-tRNA synthetase	CCNA_01381	[J] Translation	0.535307	0.402922	0.132666	0.00493559	0
CC_1338	CCNA_01399	Ammonium transporter / Methylammonium transporter	CCNA_01399	[P] Inorganic ion transport and metabolism	0.135428	0.1805	0.0427264	0.0592045	0
CC_1339	CCNA_01400	Nitrogen regulatory protein GlnK	CCNA_01400	[E] Amino acid transport and metabolism	0.228859	0.240301	0.000543307	0.0411938	0
CC_1356	CCNA_01418	Transcriptional regulator	CCNA_01418	[K] Transcription	0.266372	0.629168	0.0440223	0.0580479	0
CC_1357	CCNA_01419	Serine hydroxymethyltransferase	CCNA_01419	[E] Amino acid transport and metabolism	0.210472	0.19362	0.00338674	0.0275584	0
CC_1365	CCNA_01427	Lipoprotein (SmpA/OmlA family)	BamE	[J] Translation	0.256206	0.286907	0.0390425	0.00326343	0
CC_1366	CCNA_01429	Ubiquinol-cytochrome C reductase chaperone	CCNA_01429	[S] Function unknown	0.211222	0.290989	0.054109	0.053229	0
CC_1367	CCNA_01430	Hypothetical protein	CCNA_01430	Not classified	0.486242	0.609544	0.0382628	0.0089027	0
CC_1368	CCNA_01431	Fatty acid/phospholipid synthesis protein plsX	CCNA_01431	[I] Lipid transport and metabolism	0.456939	0.51174	0.137072	0.0180305	0
CC_1369	CCNA_01432	3-oxoacyl-[acyl-carrier-protein] synthase III	CCNA_01432	[I] Lipid transport and metabolism	0.320124	0.360469	0.0338528	0.0231348	0
CC_1370	CCNA_01433	Integration host factor alpha-subunit	CCNA_01433	[L] Replication	0.253777	0.26537	0.00162442	0.0426056	1
CC_1374	CCNA_01438	Heme O monooxygenase (ferredoxin)	CCNA_01438	[O] Posttranslational modification	0.368938	0.429645	0.0570998	0.0758754	0
CC_1376	CCNA_01440	LSU ribosomal protein L13P	CCNA_01440	[J] Translation	0.0328434	0.0226473	0.00446809	2.79676e-07	0
CC_1377	CCNA_01441	SSU ribosomal protein S9P	CCNA_01441	[J] Translation	0.054402	0.0787123	0.0108696	0.0186941	0
CC_1379	CCNA_01443	Hypothetical protein	CCNA_01443	[S] Function unknown	0.264738	0.203023	0.00661478	0.083377	0
CC_1382	CCNA_01446	Putative aminotransferase aatC	CCNA_01446	[E] Amino acid transport and metabolism	0.463764	0.488346	0.0165718	0.0561873	0
CC_1383	CCNA_01447	Homoserine dehydrogenase	CCNA_01447	[E] Amino acid transport and metabolism	0.354569	0.314486	0.0383647	0.0295199	0
CC_1385	CCNA_01449	Fructose-1,6-bisphosphatase	CCNA_01449	[G] Carbohydrate transport and metabolism	0.132467	0.20268	0.0249271	0.0425242	0
CC_1389	CCNA_01453	Electron transport complex I subunit, NADH-ubiquinone oxidoreductase	CCNA_01453	Not classified	0.502996	0.459647	0.0214818	0.117616	0
CC_1415	CCNA_01481	Conserved hypothetical protein	CCNA_01481	[T] Signal transduction mechanisms	0.439229	0.45471	0.123876	0.0247158	0
CC_1425	CCNA_01492	3-mercaptopyruvate sulfurtransferase	CCNA_01492	[P] Inorganic ion transport and metabolism	0.415339	0.500818	0.0214042	0.0934751	0
CC_1426	CCNA_01493	Cysteine synthase	CCNA_01493	[E] Amino acid transport and metabolism	0.443722	0.476939	0.0761517	0.0955836	0
CC_1429	CCNA_01496	2-dehydro-3-deoxyphosphooctonate aldolase	CCNA_01496	[M] Cell wall/membrane/envelope biogenesis	0.387649	0.387226	0.00702075	0.0556726	0
CC_1430	CCNA_01497	ADP-L-glycero-D-manno-heptose-6-epimerase	CCNA_01497	[G] Carbohydrate transport and metabolism	0.269794	0.371645	0.0574803	0.110219	0
CC_1438	CCNA_01505	Hypothetical protein	CCNA_01505	Not classified	0.431342	0.451345	0.0761152	0.032273	0
CC_1449	CCNA_01516	NAD(P)H-dependent quinone reductase	CCNA_01516	[C] Energy production and conversion	0.316089	0.391986	0.0041205	0.0879857	1
CC_1468	CCNA_01535	Single-strand DNA binding protein	CCNA_01535	[L] Replication	0.334323	0.304117	0.0285294	0.0407571	1
CC_1471	CCNA_01538	Pyruvate,phosphate dikinase	CCNA_01538	[G] Carbohydrate transport and metabolism	0.133974	0.14592	0.00437201	0.0264874	0
CC_1476	CCNA_01543	Chaperone protein dnaK	CCNA_01543	[O] Posttranslational modification	0.448175	0.492211	0.0582908	0.0452354	0
CC_1478	CCNA_01546	PHNF PROTEIN	CCNA_01546	[J] Translation	0.242111	0.352313	0.108889	0.179645	0
CC_1480	CCNA_01547	Methionyl-tRNA synthetase	CCNA_01547	[J] Translation	0.203506	0.292703	0.0435117	0.0549299	0
CC_1482	CCNA_01549	Sulfate adenylyltransferase subunit 1 / Adenylylsulfate kinase	CCNA_01549	[P] Inorganic ion transport and metabolism	0.116722	0.202625	0.0153472	0.00295365	0
CC_1483	CCNA_01550	Sulfate adenylyltransferase subunit 2	CCNA_01550	[E] Amino acid transport and metabolism	0.0998013	0.16853	0.00246513	0.0274921	0
CC_1493	CCNA_01560	Phosphoenolpyruvate carboxylase	CCNA_01560	[C] Energy production and conversion	0.127103	0.202165	0.0216505	0.059088	0
CC_1495	CCNA_01562	4-Hydroxy-2-oxoglutarate aldolase / 2-dehydro-3-deoxyphosphogluconate aldolase	CCNA_01562	[G] Carbohydrate transport and metabolism	0.0793474	0.0689217	0.00368204	0.00794224	1
CC_1496	CCNA_01563	2-dehydro-3-deoxygluconokinase	CCNA_01563	[G] Carbohydrate transport and metabolism	0.102123	0.0965011	0.000262097	0.0130821	1
CC_1512	CCNA_01580	M15 superfamily membrane peptidase	CCNA_01580	[S] Function unknown	0.461632	0.529339	0.0616584	0.0734729	0
CC_1515	CCNA_01583	Phosphate-binding protein	CCNA_01583	[P] Inorganic ion transport and metabolism	0.470137	0.533968	0.0697638	0.0151121	0
CC_1516	CCNA_01584	Multimodular transpeptidase-transglycosylase PBP 1A	CCNA_01584	[M] Cell wall/membrane/envelope biogenesis	0.164727	0.219921	0.0291609	0.0687594	0
CC_1526	CCNA_01594	Ribosomal protein L11 methyltransferase	CCNA_01594	[J] Translation	0.358619	0.491617	0.0740644	0.00111292	0
CC_1533	CCNA_01602	Glutathione S-transferase	CCNA_01602	[O] Posttranslational modification	0.482836	0.683522	0.0756382	0.0636652	0
CC_1534	CCNA_01603	Aspartate aminotransferase	CCNA_01603	[E] Amino acid transport and metabolism	0.217029	0.206437	0.0118292	0.0142304	0
CC_1549	CCNA_01618	Uracil-DNA glycosylase	CCNA_01618	[L] Replication	0.358066	0.407888	0.0992162	0.0504037	1
CC_1550	CCNA_01619	Hypothetical cytosolic protein	CCNA_01619	[S] Function unknown	0.360051	0.441167	0.0110285	0.0355619	0
CC_1555	CCNA_01624	Orotate phosphoribosyltransferase	CCNA_01624	[F] Nucleotide transport and metabolism	0.316485	0.333009	0.130688	0.0147196	1
CC_1559	CCNA_01629	Signal peptidase I	CCNA_01629	[U] Intracellular trafficking	0.276173	0.312504	0.00411523	0.0137399	0
CC_1563	CCNA_01634	N-hydroxyarylamine O-acetyltransferase	CCNA_01634	[Q] Secondary metabolites biosynthesis	0.444555	0.562607	0.0531029	0.0432852	0
CC_1567	CCNA_01638	Beta-lactamase family protein	CCNA_01638	[V] Defense mechanisms	0.464502	0.552303	0.130294	0.0964783	0
CC_1575	CCNA_01646	Dethiobiotin synthetase	CCNA_01646	[H] Coenzyme transport and metabolism	0.500993	0.57933	0.0453962	0.0073701	0
CC_1576	CCNA_01647	8-amino-7-oxononanoate synthase	CCNA_01647	[H] Coenzyme transport and metabolism	0.310059	0.396678	0.0983116	0.00617285	0
CC_1577	CCNA_01648	Adenosylmethionine-8-amino-7-oxononanoate aminotransferase	CCNA_01648	[H] Coenzyme transport and metabolism	0.364531	0.43631	0.00512611	0.062617	0
CC_1582	CCNA_01653	Peptidyl-prolyl cis-trans isomerase	CCNA_01653	[O] Posttranslational modification	0.148707	0.159407	0.0265843	0.0132125	0
CC_1583	CCNA_01654	Peptidyl-prolyl cis-trans isomerase	CCNA_01654	[O] Posttranslational modification	0.463782	0.438194	0.0490495	0.02705	0
CC_1584	CCNA_01655	Peptidyl-prolyl cis-trans isomerase	CCNA_01655	[O] Posttranslational modification	0.499602	0.440836	0.00693102	0.0278146	0
CC_1587	CCNA_01658	S-adenosylmethionine:tRNA ribosyltransferase-isomerase	CCNA_01658	[J] Translation	0.19794	0.260576	0.0165131	0.0658658	0
CC_1588	CCNA_01659	Queuine tRNA-ribosyltransferase	CCNA_01659	[J] Translation	0.28386	0.375145	0.102245	0.0839511	0
CC_1596	CCNA_01668	Sulfate transport system permease protein cysT	CCNA_01668	[O] Posttranslational modification	0.419715	0.469011	0.116418	0.0780717	0
CC_1597	CCNA_01669	Sulfate transport system permease protein cysW	CCNA_01669	[P] Inorganic ion transport and metabolism	0.144594	0.199756	0.0285082	0.0106623	1
CC_1598	CCNA_01670	Sulfate transport ATP-binding protein cysA	CCNA_01670	[P] Inorganic ion transport and metabolism	0.161644	0.285344	0.00341523	0.0535838	0
CC_1617	CCNA_01689	Inosine-5'-monophosphate dehydrogenase	CCNA_01689	[F] Nucleotide transport and metabolism	0.211758	0.256563	0.0280466	0.0254218	0
CC_1618	CCNA_01690	Hypothetical membrane spanning protein	CCNA_01690	[S] Function unknown	0.357177	0.471196	0.0153623	0.109537	0
CC_1619	CCNA_01691	16S rRNA m(5)C 967 methyltransferase	CCNA_01691	[J] Translation	0.288977	0.390155	0.130441	0.0994623	0
CC_1620	CCNA_01692	GMP synthase [glutamine-hydrolyzing]	CCNA_01692	[F] Nucleotide transport and metabolism	0.130353	0.174174	0.0331262	0.0125462	0
CC_1652	CCNA_01724	Hypothetical membrane associated protein	CCNA_01724	[S] Function unknown	0.185174	0.141564	0.0208849	0.0221118	0
CC_1653	CCNA_01725	PQQ enzyme repeat family protein	BamB	[S] Function unknown	0.0627151	0.097203	0.00703976	0.00406428	0
CC_1656	CCNA_01728	Short chain dehydrogenase	CCNA_01728	[I] Lipid transport and metabolism	0.295635	0.347485	0.0643788	0.0770427	0
CC_1659	CCNA_01731	Colicin V production protein	CCNA_01731	[R] General function prediction only	0.226376	0.262788	0.0345159	0.0333827	0
CC_1667	CCNA_01739	LSU ribosomal protein L9P	CCNA_01739	[J] Translation	0.0516321	0.0496578	0.00030903	0.00235583	0
CC_1668	CCNA_01740	SSU ribosomal protein S18P	CCNA_01740	[J] Translation	0.037796	0.0347306	0.000761946	0.00240675	0
CC_1669	CCNA_01741	SSU ribosomal protein S6P	CCNA_01741	[J] Translation	0.018225	0.0153118	0.000353999	0.0032896	0
CC_1673	CCNA_01745	Thioredoxin peroxidase	CCNA_01745	[O] Posttranslational modification	0.293076	0.259772	0.0403572	0.097919	1
CC_1674	CCNA_01746	Malonyl-CoA-[acyl-carrier-protein] transacylase	CCNA_01746	[I] Lipid transport and metabolism	0.165007	0.21384	0.0324516	0.0576035	1
CC_1675	CCNA_01747	3-oxoacyl-[acyl-carrier protein] reductase	CCNA_01747	[I] Lipid transport and metabolism	0.206683	0.190079	0.00779526	0.0312785	1
CC_1677	CCNA_01749	Acyl carrier protein	CCNA_01749	[I] Lipid transport and metabolism	0.315794	0.318567	0.0379256	0.046005	0
CC_1679	CCNA_01751	Hypothetical membrane associated protein	CCNA_01751	[R] General function prediction only	0.407389	0.500275	0.0373235	0.0870692	0
CC_1680	CCNA_01752	Protein yicC	CCNA_01752	[S] Function unknown	0.20727	0.246516	0.0482855	0.078018	1
CC_1681	CCNA_01753	Guanylate kinase	CCNA_01753	[F] Nucleotide transport and metabolism	0.225638	0.2444	0.0440563	0.020515	1
CC_1683	CCNA_01755	Two component sensor histidine kinase	CCNA_01755	[T] Signal transduction mechanisms	0.388857	0.537167	0.0115116	0.0173528	0
CC_1685	CCNA_01757	Dimethyladenosine transferase	CCNA_01757	[J] Translation	0.736243	0.778491	0.157685	0.0488938	0
CC_1686	CCNA_01758	4-hydroxythreonine-4-phosphate dehydrogenase	CCNA_01758	[H] Coenzyme transport and metabolism	0.411983	0.489691	0.0674028	0.0726243	0
CC_1689	CCNA_01760	Organic solvent tolerance protein	CCNA_01760	[M] Cell wall/membrane/envelope biogenesis	0.874334	1.03631	0.188631	0.134485	0
CC_1690	CCNA_01761	Hypothetical membrane spanning protein	CCNA_01761	[R] General function prediction only	0.366684	0.483622	0.0356192	0.0029411	0
CC_1698	CCNA_01769	ABC transporter ATP-binding protein	CCNA_01769	[R] General function prediction only	0.36472	0.538175	0.0881625	0.101553	1
CC_1699	CCNA_01770	Nucleoside diphosphate kinase	CCNA_01770	[F] Nucleotide transport and metabolism	0.0451019	0.0385074	0.00240604	0.00623274	0
CC_1703	CCNA_01775	Phosphoribosylformylglycinamidine cyclo-ligase	CCNA_01775	[F] Nucleotide transport and metabolism	0.293244	0.398162	0.0169469	0.0689818	0
CC_1708	CCNA_01780	Exopolyphosphatase	CCNA_01780	[F] Nucleotide transport and metabolism	0.34007	0.377952	0.0904917	0.115441	0
CC_1719	CCNA_01790	Protein translocase subunit secG	CCNA_01790	[U] Intracellular trafficking	0.0836217	0.113288	0.0122934	0.0209005	0
CC_1721	CCNA_01792	LSU ribosomal protein L32P	CCNA_01792	[J] Translation	0.0550996	0.0668508	0.00309113	0.0169888	0
CC_1724	CCNA_01795	Enolase	CCNA_01795	[G] Carbohydrate transport and metabolism	0.122429	0.143698	0.00103426	0.0216229	1
CC_1725	CCNA_01797	Septum formation initiator	FtsB	[D] Cell cycle control	0.444951	0.529203	0.191029	0.150454	0
CC_1726	CCNA_01799	Pyruvate dehydrogenase E1 component alpha subunit	CCNA_01799	[C] Energy production and conversion	0.0721445	0.0862585	0.00527224	0.00461579	0
CC_1727	CCNA_01800	Pyruvate dehydrogenase E1 component beta subunit	CCNA_01800	[C] Energy production and conversion	0.066129	0.0759666	0.00967972	0.00577132	1
CC_1728	CCNA_01801	Hypothetical protein	CCNA_01801	Not classified	0.15062	0.130243	0.016893	0.00471405	0
CC_1729	CCNA_01803	Dihydrolipoamide acetyltransferase component of pyruvate dehydrogenase complex	CCNA_01803	[C] Energy production and conversion	0.150303	0.183035	0.0119847	0.0168658	0
CC_1730	CCNA_01804	Glutathione peroxidase	CCNA_01804	[O] Posttranslational modification	0.141292	0.150874	0.0100623	0.0108704	0
CC_1731	CCNA_01805	Dihydrolipoamide dehydrogenase	CCNA_01805	[C] Energy production and conversion	0.114286	0.130488	0.0134192	0.0376946	0
CC_1738	CCNA_01812	2-C-methyl-D-erythritol 4-phosphate cytidylyltransferase / 2-C-methyl-D-erythritol 2,4-cyclodiphosphate synthase	CCNA_01812	[I] Lipid transport and metabolism	0.330529	0.406627	0.0538129	0.0568567	0
CC_1739	CCNA_01813	tRNA-dihydrouridine synthase	CCNA_01813	[J] Translation	0.450074	0.458009	0.0772561	0.105095	0
CC_1740	CCNA_01814	Nitrogen regulation protein ntrB	CCNA_01814	[T] Signal transduction mechanisms	0.473524	0.589816	0.0531657	0.0781496	0
CC_1741	CCNA_01815	Nitrogen assimilation regulatory protein	CCNA_01815	[T] Signal transduction mechanisms	0.298684	0.394781	0.00654772	0.0762902	0
CC_1746	CCNA_01820	GTP-binding protein hflX	CCNA_01820	[R] General function prediction only	0.358111	0.558825	0.0782391	0.104478	1
CC_1750	CCNA_01826	Vitamin B12 receptor	CCNA_01826	[H] Coenzyme transport and metabolism	0.527059	0.245431	0.00559075	0.0691296	0
CC_1751	CCNA_01827	Adenosylcobyric acid synthase (glutamine-hydrolysing)	CCNA_01827	[H] Coenzyme transport and metabolism	0.204967	0.221228	0.062227	0.0255517	0
CC_1822	CCNA_01898	DNase, TatD family	CCNA_01898	[L] Replication	0.237969	0.299621	0.0143456	0.0841263	0
CC_1842	CCNA_01918	Two-component response regulator	CCNA_01918	[T] Signal transduction mechanisms	0.300358	0.393907	0.0109791	0.0305692	0
CC_1844	CCNA_01920	Transcription-repair coupling factor	CCNA_01920	[K] Transcription	0.224907	0.327092	0.040749	0.169582	0
CC_1845	CCNA_01921	TPR repeat containing protein	CCNA_01921	[S] Function unknown	0.424423	0.435323	0.0276044	0.0451455	0
CC_1847	CCNA_01923	ATP-dependent RNA helicase	CCNA_01923	[J] Translation	0.0752113	0.0959903	0.0121708	0.00550175	0
CC_1858	CCNA_01934	HesB protein family	CCNA_01934	[S] Function unknown	0.37355	0.538285	0.0888377	0.174973	0
CC_1859	CCNA_01935	Hypothetical cytosolic protein	CCNA_01935	[R] General function prediction only	0.23819	0.280803	0.0400134	0.0278879	0
CC_1860	CCNA_01936	Cysteine desulfurase / Selenocysteine lyase	CCNA_01936	[E] Amino acid transport and metabolism	0.16731	0.214373	0.0128391	0.0294058	0
CC_1861	CCNA_01937	SufD protein	CCNA_01937	[O] Posttranslational modification	0.28817	0.262767	0.0517116	0.114057	0
CC_1862	CCNA_01938	ATP-dependent transporter sufC	CCNA_01938	[O] Posttranslational modification	0.202451	0.191989	0.0360849	0.0422735	0
CC_1863	CCNA_01939	ADP-ribosylglycohydrolase	CCNA_01939	Not classified	0.211397	0.213786	0.0315243	0.0186157	0
CC_1864	CCNA_01940	ABC transporter-associated protein sufB	CCNA_01940	[O] Posttranslational modification	0.174504	0.196623	0.0552228	0.0113889	0
CC_1865	CCNA_01941	Cysteine desulfhydrase / Selenocysteine lyase	CCNA_01941	[E] Amino acid transport and metabolism	0.408751	0.417584	0.038811	0.0558724	0
CC_1867	CCNA_01943	Alpha/beta hydrolase	CCNA_01943	[R] General function prediction only	0.185513	0.228381	0.0233847	0.0270287	0
CC_1872	CCNA_01948	Peptidoglycan-specific endopeptidase, M23 family	CCNA_01948	[M] Cell wall/membrane/envelope biogenesis	0.304498	0.397628	0.0570768	0.0469233	1
CC_1873	CCNA_01949	Hypothetical cytosolic protein	CCNA_01949	[M] Cell wall/membrane/envelope biogenesis	0.461025	0.469477	0.0444779	0.0346519	0
CC_1874	CCNA_01950	Bacterial Peptide Chain Release Factor 2 (RF-2)	CCNA_01950	[J] Translation	0.162161	0.17792	0.0419914	0.0337833	0
CC_1877	CCNA_01954	Ribonuclease E	CCNA_01954	[J] Translation	0.0519779	0.0490936	0.0290088	0.0238471	0
CC_1879	CCNA_01956	Outer membrane protein	CCNA_01956	[O] Posttranslational modification	0.348562	0.344056	0.0571645	0.0640247	0
CC_1882	CCNA_01959	3-dehydroquinate dehydratase	CCNA_01959	[E] Amino acid transport and metabolism	0.306936	0.291024	0.0704668	0.00272077	0
CC_1883	CCNA_01960	Biotin carboxyl carrier protein of acetyl-CoA carboxylase	CCNA_01960	[I] Lipid transport and metabolism	0.228153	0.259292	0.0275742	0.0259133	0
CC_1884	CCNA_01961	Biotin carboxylase	CCNA_01961	[I] Lipid transport and metabolism	0.0742636	0.089028	0.00137771	0.0269661	0
CC_1885	CCNA_01962	Leucyl/phenylalanyl-tRNA--protein transferase	CCNA_01962	[O] Posttranslational modification	0.507396	0.464844	0.141569	0.114717	0
CC_1886	CCNA_01963	Conserved hypothetical protein	CCNA_01963	[S] Function unknown	0.356942	0.462646	0.058495	0.0503317	0
CC_1887	CCNA_01964	NADH dehydrogenase	CCNA_01964	[C] Energy production and conversion	0.207054	0.24717	0.0546994	0.0436177	0
CC_1888	CCNA_01965	Hypothetical protein	CCNA_01965	Not classified	0.238462	0.365877	0.0453779	0.203595	0
CC_1892	CCNA_01969	Aspartyl-tRNA synthetase	CCNA_01969	[J] Translation	0.0988496	0.080178	0.0123824	0.0118782	0
CC_1893	CCNA_01970	Triosephosphate isomerase	CCNA_01970	[G] Carbohydrate transport and metabolism	0.442838	0.643542	0.00257253	0.0807373	0
CC_1894	CCNA_01971	Peptidyl-prolyl cis-trans isomerase	CCNA_01971	Not classified	0.168457	0.15473	0.0218068	0.0186688	0
CC_1895	CCNA_01972	Anthranilate synthase component I	CCNA_01972	[E] Amino acid transport and metabolism	0.176981	0.259975	0.0134222	0.0128299	0
CC_1897	CCNA_01974	Anthranilate synthase component II / Para-aminobenzoate synthase glutamine amidotransferase component II	CCNA_01974	[E] Amino acid transport and metabolism	0.256739	0.31089	0.0340036	0.0739755	0
CC_1898	CCNA_01975	Anthranilate phosphoribosyltransferase	CCNA_01975	[E] Amino acid transport and metabolism	0.37187	0.379193	0.0428871	0.0331661	0
CC_1899	CCNA_01976	Indole-3-glycerol phosphate synthase	CCNA_01976	[E] Amino acid transport and metabolism	0.224096	0.27787	0.00671922	0.0238279	0
CC_1901	CCNA_01978	Methyltransferase	CCNA_01978	[H] Coenzyme transport and metabolism	0.339563	0.494725	0.101195	0.114201	0
CC_1905	CCNA_01982	Glutamyl-tRNA synthetase	CCNA_01982	[J] Translation	0.159453	0.20383	0.00686757	0.0145084	0
CC_1906	CCNA_01983	Citrate synthase	CCNA_01983	[C] Energy production and conversion	0.281127	0.258331	0.0475371	0.00286842	0
CC_1910	CCNA_01987	Hypothetical protein	CCNA_01987	[S] Function unknown	0.313372	0.319634	0.0942984	0.0522254	0
CC_1911	CCNA_01988	Acyl-[acyl-carrier-protein]--UDP-N-acetylglucosamine O-acyltransferase	CCNA_01988	[M] Cell wall/membrane/envelope biogenesis	0.386905	0.397707	0.148718	0.0783166	0
CC_1912	CCNA_01989	(3R)-hydroxymyristoyl-[acyl carrier protein] dehydratase	CCNA_01989	[I] Lipid transport and metabolism	0.303664	0.251431	0.0577942	0.0276881	0
CC_1913	CCNA_01990	UDP-3-O-[3-hydroxymyristoyl] glucosamine N-acyltransferase	CCNA_01990	[M] Cell wall/membrane/envelope biogenesis	0.344023	0.348628	0.125412	0.155747	0
CC_1914	CCNA_01991	Hypothetical outer membrane protein	CCNA_01991	[M] Cell wall/membrane/envelope biogenesis	0.091478	0.0456174	0.0132823	0.00123105	0
CC_1915	CCNA_01992	Outer membrane protein assembly factor yaeT	BamA	[M] Cell wall/membrane/envelope biogenesis	0.109144	0.109465	0.0258445	0.00915709	0
CC_1917	CCNA_01994	1-deoxy-D-xylulose 5-phosphate reductoisomerase	CCNA_01994	[I] Lipid transport and metabolism	0.249348	0.356165	0.0147612	0.0496994	0
CC_1918	CCNA_01995	Phosphatidate cytidylyltransferase	CCNA_01995	[I] Lipid transport and metabolism	0.309713	0.421156	0.0343994	0.0239765	0
CC_1921	CCNA_01998	Uridylate kinase	CCNA_01998	[F] Nucleotide transport and metabolism	0.289323	0.297512	0.0660109	0.0386134	0
CC_1922	CCNA_01999	Protein Translation Elongation Factor Ts (EF-Ts)	CCNA_01999	[J] Translation	0.0508423	0.0469735	0.0103916	0.00529268	0
CC_1923	CCNA_02000	SSU ribosomal protein S2P	CCNA_02000	[J] Translation	0.0466341	0.0232477	0.00439519	0.00442952	1
CC_1929	CCNA_02006	Lipoprotein releasing system ATP-binding protein lolD	CCNA_02006	[V] Defense mechanisms	0.384253	0.444985	0.0984039	0.0339386	0
CC_1930	CCNA_02007	Lipoprotein releasing system transmembrane protein lolE	CCNA_02007	[M] Cell wall/membrane/envelope biogenesis	0.280715	0.31017	0.0399593	0.136392	0
CC_1931	CCNA_02008	Prolyl-tRNA synthetase	CCNA_02008	[J] Translation	0.101429	0.118281	0.003629	0.00650254	0
CC_1934	CCNA_02012	Metal-dependent hydrolase	CCNA_02012	[R] General function prediction only	0.34042	0.370331	0.0446334	0.0816764	0
CC_1935	CCNA_02013	Pantothenate kinase / Bvg accessory factor	CCNA_02013	[K] Transcription	0.444232	0.532789	0.0336552	0.236222	0
CC_1936	CCNA_02014	Biotin operon repressor / Biotin--[acetyl-CoA-carboxylase] synthetase	CCNA_02014	[H] Coenzyme transport and metabolism	0.246082	0.262056	0.0518313	0.0315918	0
CC_1948	CCNA_02025	hypothetical protein	CCNA_02025	Not classified	0.372136	0.335258	0.0120029	0.0240622	0
CC_1949	CCNA_02026	hypothetical protein	CCNA_02026	Not classified	0.421753	0.420526	0.00693866	0.0216636	0
CC_1951	CCNA_02028	NTF2 enzyme family protein	CCNA_02028	[S] Function unknown	0.132299	0.164669	0.00183597	0.0205135	0
CC_1953	CCNA_02030	hypothetical protein	CCNA_02030	Not classified	0.324771	0.380951	0.0259458	0.0507623	0
CC_1964	CCNA_02042	Trigger factor, ppiase	CCNA_02042	[O] Posttranslational modification	0.0383964	0.0443231	0.00895069	0.00688042	0
CC_1968	CCNA_02046	Nitrogen regulatory protein P-II	CCNA_02046	[E] Amino acid transport and metabolism	0.103131	0.0611604	0.0246688	0.00620217	1
CC_1969	CCNA_02047	Glutamine synthetase	CCNA_02047	[E] Amino acid transport and metabolism	0.0392209	0.0293976	0.00134997	0.00266941	0
CC_1970	CCNA_02048	TonB-dependent receptor	CCNA_02048	[P] Inorganic ion transport and metabolism	0.0591492	0.0542825	0.0115553	0.00933042	0
CC_1972	CCNA_02050	Dihydroorotase	CCNA_02050	[Q] Secondary metabolites biosynthesis	0.293196	0.424207	0.0696076	0.0263343	1
CC_1973	CCNA_02051	Dihydroorotase	CCNA_02051	[Q] Secondary metabolites biosynthesis	0.338941	0.52724	0.0323819	0.0231767	0
CC_1984	CCNA_02063	Lipoprotein, ComL family	BamD	[R] General function prediction only	0.14866	0.127789	0.0493961	0.00620389	0
CC_1987	CCNA_02066	Phytoene synthase family protein	CCNA_02066	[I] Lipid transport and metabolism	0.503015	0.653658	0.141803	0.048225	0
CC_1989	CCNA_02068	Mth938-like membrane protein	CCNA_02068	[S] Function unknown	0.218452	0.297148	0.0563694	0.090555	0
CC_1990	CCNA_02069	Protein translocase subunit secF	CCNA_02069	[U] Intracellular trafficking	0.149701	0.148133	0.018845	0.0325937	0
CC_1991	CCNA_02070	Protein translocase subunit secD	CCNA_02070	[U] Intracellular trafficking	0.116299	0.152325	0.00873333	0.0124138	0
CC_1992	CCNA_02071	Protein translocase subunit YajC	CCNA_02071	[U] Intracellular trafficking	0.0982709	0.0940905	0.00251723	0.00995951	0
CC_1997	CCNA_02076	Protein-L-isoaspartate O-methyltransferase	CCNA_02076	[O] Posttranslational modification	0.294233	0.348275	0.0452816	0.00466755	0
CC_1998	CCNA_02077	Acid phosphatase surE	CCNA_02077	[R] General function prediction only	0.223644	0.284207	0.0353926	0.0576736	1
CC_2001	CCNA_02080	Sec-independent protein translocase protein tatC	CCNA_02080	[U] Intracellular trafficking	0.385843	0.506399	0.103682	0.0124978	0
CC_2002	CCNA_02081	Sec-independent protein translocase protein tatB	CCNA_02081	[U] Intracellular trafficking	0.430723	0.347193	0.0618464	0.060182	0
CC_2006	CCNA_02085	Anhydromuramoyl-peptide exo-beta-N-acetylglucosaminidase	CCNA_02085	[G] Carbohydrate transport and metabolism	0.369401	0.493531	0.000213801	0.0669251	0
CC_2017	CCNA_02096	conserved hypothetical protein	CCNA_02096	Not classified	0.4981	0.534987	0.0437715	0.00341946	0
CC_2018	CCNA_02097	Periplasmic glucan glucosyltransferase	CCNA_02097	[M] Cell wall/membrane/envelope biogenesis	0.208945	0.316236	0.0287004	0.0183283	1
CC_2019	CCNA_02098	Molybdopterin-guanine dinucleotide biosynthesis protein A	CCNA_02098	Not classified	0.160968	0.254367	0.00288108	0.0236533	0
CC_2047	CCNA_02127	Oxacillin resistance-associated protein fmtC	CCNA_02127	[S] Function unknown	0.372274	0.450062	0.107142	0.0868262	1
CC_2051	CCNA_02130	Pyruvate kinase	CCNA_02130	[G] Carbohydrate transport and metabolism	0.355505	0.407476	0.022074	0.0704314	0
CC_2053	CCNA_02132	Transcriptional regulator, LacI family	CCNA_02132	[K] Transcription	0.128518	0.192178	0.014262	0.0131231	0
CC_2058	CCNA_02137	Endoglucanase H	CCNA_02137	Not classified	0.493153	0.714038	0.098391	0.0317479	1
CC_2089	CCNA_02171	Nucleoside permease nupC	CCNA_02171	[F] Nucleotide transport and metabolism	0.183672	0.184076	0.034425	0.0165365	0
CC_2095	CCNA_02180	Iron-sulfur cluster assembly/repair protein ApbC	CCNA_02180	[D] Cell cycle control	0.506412	0.487397	0.0525838	0.00669355	0
CC_2096	CCNA_02181	Phosphatase/phosphohexomutase family protein	CCNA_02181	[R] General function prediction only	0.315917	0.425002	0.0539549	0.0584779	0
CC_2107	CCNA_02192	Hypothetical protein	CCNA_02192	[L] Replication	0.359647	0.330903	0.095906	0.123368	0
CC_2109	CCNA_02194	Fumarate hydratase	CCNA_02194	[C] Energy production and conversion	0.241741	0.284813	0.008103	0.00812516	0
CC_2120	CCNA_02204	Ketol-acid reductoisomerase / 2-dehydropantoate 2-reductase	CCNA_02204	[E] Amino acid transport and metabolism	0.23875	0.196043	0.00563801	0.0245773	0
CC_2135	CCNA_02219	hypothetical protein	CCNA_02219	Not classified	0.362588	0.37639	0.173961	0.0244498	0
CC_2137	CCNA_02221	Methionine synthase I metH	CCNA_02221	[E] Amino acid transport and metabolism	0.106145	0.149827	0.00722055	0.0803533	0
CC_2138	CCNA_02222	5-methyltetrahydrofolate--homocysteine methyltransferase homocysteine-binding subunit	CCNA_02222	[E] Amino acid transport and metabolism	0.0439499	0.0530092	0.0143305	0.0188872	1
CC_2139	CCNA_02223	Beta-lactamase, type II	CCNA_02223	[R] General function prediction only	0.0659015	0.0895865	0.0176314	0.0326383	0
CC_2140	CCNA_02224	Methylenetetrahydrofolate reductase	CCNA_02224	[E] Amino acid transport and metabolism	0.0986538	0.102282	0.0485096	0.0321343	1
CC_2141	CCNA_02225	Transcriptional regulator, ArsR family / SAM-dependent methyltransferase	CCNA_02225	[H] Coenzyme transport and metabolism	0.0811038	0.0911188	0.0235403	0.00977511	1
CC_2148	CCNA_02231	ABC transporter ATP-binding protein	CCNA_02231	[R] General function prediction only	0.0993548	0.0963455	0.00228304	0.0137836	0
CC_2154	CCNA_02237	Xaa-Pro dipeptidyl-peptidase	CCNA_02237	[E] Amino acid transport and metabolism	0.152517	0.197895	0.0209637	0.0142486	0
CC_2166	CCNA_02247	Pantoate--beta-alanine ligase	CCNA_02247	[H] Coenzyme transport and metabolism	0.432063	0.442327	0.0834858	0.0714956	0
CC_2191	CCNA_02273	Glutathione peroxidase	CCNA_02273	Not classified	0.639253	0.54703	0.0242162	0.0705751	0
CC_2194	CCNA_02277	Hemin receptor	CCNA_02277	[P] Inorganic ion transport and metabolism	0.146894	0.0900336	0.0179577	0.00129068	0
CC_2195	CCNA_02278	Putative membrane-associated alkaline phosphatase	CCNA_02278	[S] Function unknown	0.216232	0.246757	0.0305613	0.0259467	0
CC_2196	CCNA_02279	Disulfide bond formation protein B	CCNA_02279	[O] Posttranslational modification	0.247746	0.37306	0.0484629	0.00673085	0
CC_2197	CCNA_02280	2-polyprenyl-3-methyl-6-methoxy-1,4-benzoquinol hydroxylase	CCNA_02280	[H] Coenzyme transport and metabolism	0.361075	0.39721	0.0270749	0.024242	0
CC_2210	CCNA_02293	Thiol:disulfide interchange protein tlpA	CCNA_02293	[C] Energy production and conversion	0.28611	0.406129	0.0210567	0.0611212	0
CC_2211	CCNA_02294	Argininosuccinate lyase	CCNA_02294	[E] Amino acid transport and metabolism	0.144981	0.198928	0.00754571	0.00200813	0
CC_2222	CCNA_02305	chorismate mutase-family protein	CCNA_02305	[E] Amino acid transport and metabolism	0.228755	0.357128	0.0550769	0.00969792	0
CC_2223	CCNA_02306	Histidinol-phosphate aminotransferase	CCNA_02306	[E] Amino acid transport and metabolism	0.14399	0.154427	0.0412798	0.00330829	0
CC_2224	CCNA_02307	Arogenate dehydrogenase / Prephenate dehydrogenase	CCNA_02307	[E] Amino acid transport and metabolism	0.304509	0.345809	0.017657	0.0571174	0
CC_2238	CCNA_02321	O-succinylhomoserine sulfhydrylase	CCNA_02321	[E] Amino acid transport and metabolism	0.147221	0.179518	0.0182923	0.026897	1
CC_2239	CCNA_02322	ApaG protein	CCNA_02322	[P] Inorganic ion transport and metabolism	0.290665	0.320094	0.0285918	0.0513139	0
CC_2242	CCNA_02325	Ornithine carbamoyltransferase	CCNA_02325	[E] Amino acid transport and metabolism	0.254283	0.293448	0.00384519	0.0261514	0
CC_2243	CCNA_02326	Acetylornithine aminotransferase / Succinyldiaminopimelate aminotransferase	CCNA_02326	[E] Amino acid transport and metabolism	0.174971	0.208095	0.00549963	0.0145934	0
CC_2249	CCNA_02332	chemotaxis receiver protein cheYIII	CCNA_02332	[T] Signal transduction mechanisms	0.335322	0.325336	0.153466	0.126157	1
CC_2255	CCNA_02338	hypothetical protein	CCNA_02338	Not classified	0.320087	0.367884	0.0108228	0.0257611	0
CC_2257	CCNA_02340	Methyltransferase	CCNA_02340	[R] General function prediction only	0.325101	0.364897	0.0308478	0.0628865	0
CC_2258	CCNA_02341	Small heat shock protein	CCNA_02341	[O] Posttranslational modification	0.431259	0.570227	0.10229	0.131243	1
CC_2261	CCNA_02344	Phosphoglycerate mutase	CCNA_02344	[G] Carbohydrate transport and metabolism	0.0434361	0.0592871	0.00247258	0.0279347	0
CC_2285	CCNA_02368	Alpha-glucosidase	CCNA_02368	[G] Carbohydrate transport and metabolism	0.506547	1.46086	0.132418	0.0453809	0
CC_2295	CCNA_02380	Aspartate 1-decarboxylase	CCNA_02380	[H] Coenzyme transport and metabolism	0.363424	0.319252	0.0124212	0.00308381	0
CC_2300	CCNA_02385	3-deoxy-7-phosphoheptulonate synthase	CCNA_02385	[E] Amino acid transport and metabolism	0.087848	0.0742368	0.0212778	0.0143825	0
CC_2301	CCNA_02386	O-antigen ligase related enzyme	CCNA_02386	[M] Cell wall/membrane/envelope biogenesis	0.43474	0.412927	0.118831	0.064302	0
CC_2302	CCNA_02387	Glutathione reductase	CCNA_02387	[C] Energy production and conversion	0.438076	0.39244	0.0296121	0.0633181	0
CC_2303	CCNA_02388	Ribose 5-phosphate isomerase	CCNA_02388	[G] Carbohydrate transport and metabolism	0.435953	0.474014	0.0377345	0.0900826	0
CC_2304	CCNA_02389	Glucosamine-1-phosphate acetyltransferase / UDP-N-acetylglucosamine pyrophosphorylase	CCNA_02389	[M] Cell wall/membrane/envelope biogenesis	0.352563	0.504085	0.0582863	0.027074	0
CC_2340	CCNA_02425	non-essential pilus assembly protein	CCNA_02425	[S] Function unknown	0.151661	0.20265	0.0633939	0.103163	0
CC_2342	CCNA_02427	Septum formation protein Maf	CCNA_02427	[D] Cell cycle control	0.357851	0.440468	0.0467093	0.0646803	0
CC_2343	CCNA_02428	Bacterial Protein Translation Initiation Factor 1 (IF-1)	CCNA_02428	[J] Translation	0.254235	0.210568	0.0858392	0.0379897	0
CC_2346	CCNA_02431	Histidinol dehydrogenase	CCNA_02431	[E] Amino acid transport and metabolism	0.494938	0.52874	0.0436695	0.0591822	1
CC_2350	CCNA_02435	UDP-N-acetylglucosamine 1-carboxyvinyltransferase	CCNA_02435	[M] Cell wall/membrane/envelope biogenesis	0.295865	0.410052	0.0101409	0.0130557	0
CC_2361	CCNA_02446	Glutathionylspermidine synthase family	CCNA_02446	[E] Amino acid transport and metabolism	0.490865	0.640765	0.0415689	0.099168	0
CC_2382	CCNA_02465	UDP-glucose 6-dehydrogenase	CCNA_02465	[M] Cell wall/membrane/envelope biogenesis	0.49079	0.576388	0.0445681	0.0377234	0
CC_2383	CCNA_02466	UDP-glucose 4-epimerase	CCNA_02466	[M] Cell wall/membrane/envelope biogenesis	0.425462	0.455949	0.0870786	0.0764249	0
CC_2443	CCNA_02525	Aspartate carbamoyltransferase	CCNA_02525	[F] Nucleotide transport and metabolism	0.30447	0.32566	0.0302621	0.0114558	0
CC_2444	CCNA_02526	Dihydroorotase	CCNA_02526	[F] Nucleotide transport and metabolism	0.227454	0.256717	0.0288853	0.0210053	1
CC_2445	CCNA_02527	hypothetical protein	CCNA_02527	Not classified	0.349595	0.400879	0.112188	0.0874354	0
CC_2451	CCNA_02535	DNA topoisomerase I	CCNA_02535	[L] Replication	0.110593	0.162313	0.054526	0.0885758	0
CC_2456	CCNA_02540	N-acyl-L-amino acid amidohydrolase	CCNA_02540	[R] General function prediction only	0.211804	0.218537	0.0116905	0.00806782	1
CC_2459	CCNA_02543	LSU ribosomal protein L33P	CCNA_02543	[J] Translation	0.0455299	0.0494493	0.00393019	0.0152395	0
CC_2487	CCNA_02572	Adenylosuccinate lyase	CCNA_02572	[F] Nucleotide transport and metabolism	0.129931	0.143757	0.0643209	0.00753894	0
CC_2488	CCNA_02573	proline hydroxylase	CCNA_02573	[O] Posttranslational modification	0.433502	0.414671	0.134625	0.0742756	0
CC_2490	CCNA_02575	Hypothetical cytosolic protein	CCNA_02575	[S] Function unknown	0.375479	0.357992	0.0088096	0.0528456	0
CC_2497	CCNA_02583	Phosphoribosylformylglycinamidine synthase	CCNA_02583	[F] Nucleotide transport and metabolism	0.110708	0.130044	0.0160689	0.0222177	0
CC_2500	CCNA_02586	Phosphoribosylformylglycinamidine synthase	CCNA_02586	[F] Nucleotide transport and metabolism	0.195584	0.192499	0.0186324	0.0263307	0
CC_2522	CCNA_02607	Isocitrate dehydrogenase [NADP]	CCNA_02607	[C] Energy production and conversion	0.0752488	0.0728637	0.00617266	0.0172179	0
CC_2529	CCNA_02612	Alanyl-tRNA synthetase	CCNA_02612	[J] Translation	0.150277	0.190311	0.0394798	0.00358298	0
CC_2544	CCNA_02627	Aminopeptidase	CCNA_02627	[R] General function prediction only	0.502298	0.570155	0.0623849	0.0835058	0
CC_2551	CCNA_02634	UDP-N-acetylglucosamine--N-acetylmuramyl-(pentapeptide) pyrophosphoryl-undecaprenol N-acetylglucosamine transferase	murG	[M] Cell wall/membrane/envelope biogenesis	0.365729	0.374326	0.0679964	0.0195512	1
CC_2590	CCNA_02673	Excinuclease ABC subunit A	CCNA_02673	[L] Replication	0.48232	0.543368	0.132898	0.0591494	1
CC_2598	CCNA_02681	Glucose inhibited division protein A	CCNA_02681	[J] Translation	0.403194	0.473532	0.0402644	0.0425402	0
CC_2610	CCNA_02693	Iron-regulated protein frpC	CCNA_02693	Not classified	0.399778	0.394667	0.00463379	0.039239	1
CC_2631	CCNA_02714	ABC transporter ATP-binding protein uup	CCNA_02714	[R] General function prediction only	0.399435	0.586017	0.0834156	0.136927	0
CC_2638	CCNA_02721	Peptidase, M16 family	CCNA_02721	[R] General function prediction only	0.256909	0.407175	0.0656714	0.0722865	0
CC_2654	CCNA_02737	Queuosine biosynthesis protein QueF	CCNA_02737	[R] General function prediction only	0.180718	0.304842	0.029814	0.116582	0
CC_2664	CCNA_02747	ABC transporter substrate-binding protein	CCNA_02747	[P] Inorganic ion transport and metabolism	0.154663	0.245142	0.0205845	0.0662324	0
CC_2696	CCNA_02779	Hypothetical protein	CCNA_02779	[S] Function unknown	0.410944	0.630055	0.164567	0.123015	1
CC_2760	CCNA_02848	Heme chaperone--apocytochrome heme-lyase	CCNA_02848	[O] Posttranslational modification	0.454091	0.524303	0.0103668	0.0199698	0
CC_2761	CCNA_02849	Cytochrome c-type biogenesis heme chaperone	CCNA_02849	[O] Posttranslational modification	0.546245	0.4918	0.0166878	0.0739083	0
CC_2819	CCNA_02910	TonB-dependent receptor	CCNA_02910	[H] Coenzyme transport and metabolism	0.147588	0.175503	0.0194587	0.0148879	0
CC_2824	CCNA_02915	Microcin-processing peptidase 1 (PmbA)	CCNA_02915	[R] General function prediction only	0.415499	0.494819	0.0761674	0.0126293	1
CC_2840	CCNA_02933	Aminopeptidase	CCNA_02933	[R] General function prediction only	0.0813525	0.0873228	0.00922505	0.0312165	0
CC_2849	CCNA_02942	Hypothetical protein	CCNA_02942	[M] Cell wall/membrane/envelope biogenesis	0.355074	0.284763	0.21923	0.0668304	0
CC_2872	CCNA_02965	Cell wall hydrolase family protein	CCNA_02965	[M] Cell wall/membrane/envelope biogenesis	0.441739	0.575094	0.0853571	0.0522317	0
CC_2900	CCNA_02994	Carbamoyl-phosphate synthase large chain	CCNA_02994	[E] Amino acid transport and metabolism	0.181418	0.232807	0.0281894	0.0543993	0
CC_2903	CCNA_02997	Cold shock protein	CCNA_02997	[K] Transcription	0.333194	0.376118	0.183039	0.211006	0
CC_2918	CCNA_03012	Peroxiredoxin	CCNA_03012	[O] Posttranslational modification	0.0711465	0.0699052	0.0270251	0.033489	0
CC_2919	CCNA_03013	Peroxiredoxin reductase (NAD(P)H) / NADH oxidase H2O2-forming	CCNA_03013	[O] Posttranslational modification	0.381383	0.399459	0.00690798	0.0277521	0
CC_2927	CCNA_03022	Transporter	CCNA_03022	[S] Function unknown	0.291416	0.244682	0.0720346	0.140188	0
CC_2928	CCNA_03023	TonB-dependent receptor	CCNA_03023	[P] Inorganic ion transport and metabolism	0.164388	0.134328	0.00221346	0.0118505	0
CC_2929	CCNA_03024	Branched-chain amino acid aminotransferase	CCNA_03024	[E] Amino acid transport and metabolism	0.112236	0.138438	0.0136327	0.0239724	1
CC_2933	CCNA_03028	Prephenate dehydratase	CCNA_03028	[E] Amino acid transport and metabolism	0.292464	0.356759	0.0553137	0.00137082	0
CC_2934	CCNA_03029	3-deoxy-manno-octulosonate cytidylyltransferase	CCNA_03029	[M] Cell wall/membrane/envelope biogenesis	0.450176	0.583698	0.0331075	0.0592923	0
CC_2935	CCNA_03030	Cytochrome c	CCNA_03030	[C] Energy production and conversion	0.233986	0.223429	0.0630685	0.0293356	0
CC_2941	CCNA_03036	TadB-related pilus assembly protein	CCNA_03036	[U] Intracellular trafficking	0.583667	0.439342	0.168076	0.0973859	0
CC_2955	CCNA_03050	Protein tyrosine phosphatase	CCNA_03050	[T] Signal transduction mechanisms	0.432588	0.38347	0.0717663	0.0654979	0
CC_2967	CCNA_03062	Cell wall hydrolase family protein	CCNA_03062	[M] Cell wall/membrane/envelope biogenesis	0.0630026	0.110795	0.0208227	0.0434553	1
CC_2976	CCNA_03071	Flagellin	CCNA_03071	[N] Cell motility	0.442134	0.516048	0.0488038	0.0492066	0
CC_2986	CCNA_03081	Hypothetical protein	CCNA_03081	[S] Function unknown	0.463698	0.571103	0.22458	0.306785	1
CC_2987	CCNA_03082	Hypothetical protein	CCNA_03082	Not classified	0.354608	0.581186	0.121421	0.212483	0
CC_2994	CCNA_03089	Hypothetical protein	CCNA_03089	[S] Function unknown	0.433741	0.521602	0.0300378	0.0610594	0
CC_2995	CCNA_03090	Acetyl-coenzyme A carboxylase carboxyl transferase subunit alpha	CCNA_03090	[I] Lipid transport and metabolism	0.286404	0.489927	0.0240204	0.0472643	0
CC_3005	CCNA_03100	PhnA protein	CCNA_03100	[P] Inorganic ion transport and metabolism	0.48233	0.555552	0.0693719	0.0491257	0
CC_3013	CCNA_03108	TonB-dependent outer membrane receptor	CCNA_03108	[P] Inorganic ion transport and metabolism	0.254239	0.376261	0.00499847	0.0375576	0
CC_3034	CCNA_03129	Peptidoglycan-specific endopeptidase, M23 family	CCNA_03129	[M] Cell wall/membrane/envelope biogenesis	0.294483	0.395324	0.00519642	0.0263296	1
CC_3044	CCNA_03139	Dihydroxy-acid dehydratase	CCNA_03139	[E] Amino acid transport and metabolism	0.224758	0.254112	0.0563311	0.0447189	0
CC_3047	CCNA_03142	RNA polymerase sigma factor rpoD	rpoD	[K] Transcription	0.108594	0.140154	0.00491091	0.0111159	1
CC_3059	CCNA_03155	Transporter	CCNA_03155	[S] Function unknown	0.200512	0.167303	0.0439363	0.0606817	0
CC_3060	CCNA_03156	Hypothetical periplasmic protein	CCNA_03156	[S] Function unknown	0.243476	0.199394	0.0463341	0.0487861	0
CC_3061	CCNA_03157	Hypothetical membrane spanning protein	CCNA_03157	Not classified	0.048814	0.0581706	0.00255424	0.00631424	1
CC_3062	CCNA_03158	Iron-sulfur cluster assembly/repair protein ApbE	CCNA_03158	[H] Coenzyme transport and metabolism	0.416839	0.281183	0.177576	0.0135856	0
CC_3063	CCNA_03159	Sulfite reductase [NADPH] flavoprotein alpha-component	CCNA_03159	[P] Inorganic ion transport and metabolism	0.492797	0.452622	0.159799	0.0810657	0
CC_3068	CCNA_03164	Protein translocase subunit secA	CCNA_03164	[U] Intracellular trafficking	0.0281306	0.0366831	0.00650978	0.0109689	0
CC_3071	CCNA_03167	Hypothetical protein	CCNA_03167	Not classified	0.412414	0.463879	0.103475	0.0312212	0
CC_3072	CCNA_03168	Hypothetical protein	CCNA_03168	Not classified	0.23672	0.319033	0.0204442	0.0176978	0
CC_3081	CCNA_03177	Methylmalonyl-CoA mutase homolog MeaA	CCNA_03177	[I] Lipid transport and metabolism	0.472188	0.627039	0.0959441	0.0614148	0
CC_3102	CCNA_03200	hybrid sensor histidine kinase/receiver domain protein	CCNA_03200	[T] Signal transduction mechanisms	0.537401	0.577076	0.109397	0.00989002	1
CC_3103	CCNA_03201	Adenylosuccinate synthetase	CCNA_03201	[F] Nucleotide transport and metabolism	0.147734	0.202389	0.00252932	0.062299	0
CC_3107	CCNA_03205	Aminopeptidase	CCNA_03205	[R] General function prediction only	0.379533	0.503029	0.0499347	0.027345	0
CC_3108	CCNA_03206	L-serine dehydratase	CCNA_03206	[E] Amino acid transport and metabolism	0.303048	0.374698	0.0457013	0.145037	0
CC_3117	CCNA_03216	Hypothetical protein	CCNA_03216	Not classified	0.266927	0.279307	0.0318696	0.021001	0
CC_3154	CCNA_03256	Chorismate synthase	CCNA_03256	[E] Amino acid transport and metabolism	0.308053	0.330956	0.111912	0.114118	0
CC_3155	CCNA_03257	Chemotaxis receiver domain protein cheYIII	CCNA_03257	[T] Signal transduction mechanisms	0.353062	0.436795	0.121509	0.114379	0
CC_3158	CCNA_03260	Queuosine biosynthesis protein queD	CCNA_03260	[H] Coenzyme transport and metabolism	0.474269	0.527747	0.0407414	0.0753678	0
CC_3159	CCNA_03261	Queuosine biosynthesis protein QueE	CCNA_03261	[O] Posttranslational modification	0.357974	0.366205	0.0628543	0.102135	0
CC_3160	CCNA_03262	Queuosine biosynthesis protein QueC	CCNA_03262	[R] General function prediction only	0.420085	0.57844	0.0926546	0.0424821	0
CC_3177	CCNA_03281	Transcriptional regulator, AsnC family	CCNA_03281	[K] Transcription	0.153462	0.132889	0.0270287	0.0326395	1
CC_3186	CCNA_03290	Conserved hypothetical protein	CCNA_03290	[S] Function unknown	0.446237	0.515521	0.0871977	0.0189118	0
CC_3195	CCNA_03299	Outer membrane protein oprM	CCNA_03299	[M] Cell wall/membrane/envelope biogenesis	0.299168	0.270351	0.015007	0.0208873	0
CC_3200	CCNA_03304	Protein Translation Elongation Factor G (EF-G)	CCNA_03304	[J] Translation	0.0433444	0.0513715	0.00719202	0.0101152	0
CC_3201	CCNA_03305	SSU ribosomal protein S7P	CCNA_03305	[J] Translation	0.0263591	0.0287276	0.00265962	0.00415176	0
CC_3202	CCNA_03306	SSU ribosomal protein S12P	CCNA_03306	[J] Translation	0.046715	0.0460029	0.00849309	0.00911716	1
CC_3203	CCNA_03308	Hypothetical protein	CCNA_03308	Not classified	0.424991	0.375187	0.0243081	0.0413888	0
CC_3205	CCNA_03310	Transcription antitermination protein nusG	CCNA_03310	[K] Transcription	0.180894	0.273794	0.0210691	0.0492088	0
CC_3206	CCNA_03311	Protein translocase subunit secE	CCNA_03311	[U] Intracellular trafficking	0.172476	0.210979	0.0490824	0.0241988	0
CC_3208	CCNA_03314	Ferredoxin--NADP reductase	CCNA_03314	[C] Energy production and conversion	0.159838	0.234797	0.041148	0.00839772	1
CC_3215	CCNA_03322	D-3-phosphoglycerate dehydrogenase	CCNA_03322	[E] Amino acid transport and metabolism	0.137351	0.113681	0.0343338	0.0125279	0
CC_3216	CCNA_03323	Phosphoserine aminotransferase	CCNA_03323	[E] Amino acid transport and metabolism	0.161396	0.161295	0.0345915	0.0310704	0
CC_3222	CCNA_03330	Hypothetical protein	CCNA_03330	[S] Function unknown	0.373469	0.433808	0.0472724	0.0560555	1
CC_3242	CCNA_03351	Phosphoribosylamidoimidazole-succinocarboxamide synthase	CCNA_03351	[F] Nucleotide transport and metabolism	0.351602	0.418782	0.0284547	0.000343064	0
CC_3243	CCNA_03352	Hypothetical cytosolic protein	CCNA_03352	[S] Function unknown	0.225414	0.237383	0.0133123	0.0758376	0
CC_3244	CCNA_03353	Hypothetical protein	CCNA_03353	[S] Function unknown	0.316695	0.410965	0.0487759	0.0514023	0
CC_3248	CCNA_03358	Glyceraldehyde 3-phosphate dehydrogenase	CCNA_03358	[G] Carbohydrate transport and metabolism	0.233123	0.250698	0.0216091	0.0641803	0
CC_3249	CCNA_03359	Phosphoglycerate kinase	CCNA_03359	[G] Carbohydrate transport and metabolism	0.1595	0.228013	0.0319859	0.0353025	0
CC_3250	CCNA_03360	Fructose-bisphosphate aldolase	CCNA_03360	[G] Carbohydrate transport and metabolism	0.320228	0.415271	0.0291201	0.0228764	0
CC_3263	CCNA_03372	Bacterioferritin-associated ferredoxin	CCNA_03372	[P] Inorganic ion transport and metabolism	0.177417	0.197447	0.022688	0.0726945	0
CC_3269	CCNA_03378	Myo-inositol-1(or 4)-monophosphatase	CCNA_03378	[G] Carbohydrate transport and metabolism	0.117853	0.129832	0.00607639	0.0271389	0
CC_3273	CCNA_03382	Hypothetical cytosolic protein	CCNA_03382	Not classified	0.304994	0.379609	0.0291649	0.00865402	0
CC_3274	CCNA_03383	Multidrug/protein/lipid ABC transporter family, ATP-binding and permease protein	CCNA_03383	[V] Defense mechanisms	0.502025	0.738377	0.134788	0.140414	0
CC_3275	CCNA_03384	LSU ribosomal protein L31P	CCNA_03384	[J] Translation	0.118559	0.150424	0.0227992	0.0152376	0
CC_3283	CCNA_03392	Phosphoribosylaminoimidazole carboxylase NCAIR mutase subunit	CCNA_03392	[F] Nucleotide transport and metabolism	0.372505	0.385217	0.110895	0.00708214	0
CC_3292	CCNA_03401	Hypothetical cytosolic protein	CCNA_03401	[S] Function unknown	0.259679	0.253945	0.027619	0.00938487	0
CC_3297	CCNA_03406	SSU ribosomal protein S21P	CCNA_03406	[J] Translation	0.0720016	0.0956622	0.0101446	0.0036014	0
CC_3319	CCNA_03428	Hypothetical cytosolic protein	CCNA_03428	[S] Function unknown	0.0678163	0.0954305	0.0206545	0.00257453	0
CC_3320	CCNA_03429	Hydrolase (HAD superfamily)	CCNA_03429	[R] General function prediction only	0.300829	0.300997	0.0540386	0.172763	0
CC_3352	CCNA_03462	Glycine dehydrogenase [decarboxylating]	CCNA_03462	[E] Amino acid transport and metabolism	0.431383	0.544525	0.0815516	0.0913682	0
CC_3353	CCNA_03463	Glycine dehydrogenase [decarboxylating]	CCNA_03463	[E] Amino acid transport and metabolism	0.454639	0.426311	0.0987233	0.102262	0
CC_3355	CCNA_03465	Aminomethyltransferase	CCNA_03465	[E] Amino acid transport and metabolism	0.470579	0.510496	0.0598986	0.0347586	1
CC_3359	CCNA_03469	Arginyl-tRNA synthetase	CCNA_03469	[J] Translation	0.129456	0.134016	0.0386286	0.0181612	0
CC_3364	CCNA_03475	Homoserine kinase	CCNA_03475	[R] General function prediction only	0.451426	0.497557	0.0530461	0.119123	0
CC_3365	CCNA_03476	Ribonuclease HI	CCNA_03476	[L] Replication	0.455052	0.629882	0.0206129	0.0340421	0
CC_3385	CCNA_03496	Hypothetical cytosolic protein	CCNA_03496	[S] Function unknown	0.384552	0.432518	0.141104	0.128305	0
CC_3392	CCNA_03503	YceI-family periplasmic protein	CCNA_03503	[S] Function unknown	0.452165	0.6338	0.0176571	0.0230423	1
CC_3393	CCNA_03504	Acyl-CoA dehydrogenase	CCNA_03504	[I] Lipid transport and metabolism	0.444878	0.586322	0.0531028	0.0400357	0
CC_3394	CCNA_03505	Peroxiredoxin	CCNA_03505	[O] Posttranslational modification	0.380992	0.34074	0.0500898	0.0609189	0
CC_3398	CCNA_03509	Zinc protease	CCNA_03509	[R] General function prediction only	0.453745	0.580579	0.0604981	0.0367199	0
CC_3399	CCNA_03510	Threonine synthase	CCNA_03510	[E] Amino acid transport and metabolism	0.389958	0.482349	0.00949131	0.00891017	0
CC_3413	CCNA_03524	Di-/tripeptide transporter	CCNA_03524	[E] Amino acid transport and metabolism	0.223943	0.289307	0.0439805	0.0413509	0
CC_3420	CCNA_03533	Multidrug resistance ABC transporter ATP-binding and permease protein	CCNA_03533	[V] Defense mechanisms	0.48022	0.630189	0.0569897	0.130639	0
CC_3431	CCNA_03544	Nicotinate-nucleotide adenylyltransferase	CCNA_03544	[H] Coenzyme transport and metabolism	0.332494	0.383453	0.0206506	0.137803	0
CC_3445	CCNA_03558	ATP synthase epsilon chain	CCNA_03558	[C] Energy production and conversion	0.332334	0.413175	0.0273584	0.0743812	0
CC_3446	CCNA_03559	Hypothetical protein	CCNA_03559	Not classified	0.14459	0.150678	0.00433106	0.0106482	0
CC_3447	CCNA_03560	ATP synthase beta chain	CCNA_03560	[C] Energy production and conversion	0.0530998	0.0593124	0.00662292	0.00413721	0
CC_3448	CCNA_03561	ATP synthase gamma chain	CCNA_03561	[C] Energy production and conversion	0.0493676	0.0620905	0.000683203	0.00833798	0
CC_3449	CCNA_03562	ATP synthase alpha chain	CCNA_03562	[C] Energy production and conversion	0.0548002	0.0644743	0.00434348	0.000631448	0
CC_3450	CCNA_03563	ATP synthase delta chain	CCNA_03563	[C] Energy production and conversion	0.0946147	0.150081	0.0103958	0.0356875	0
CC_3465	CCNA_03578	ATP-dependent DNA helicase recQ	CCNA_03578	[L] Replication	0.302827	0.3746	0.0870577	0.194132	0
CC_3469	CCNA_03582	3'(2'),5'-bisphosphate nucleotidase / Myo-inositol 1-(4-)phosphatase	CCNA_03582	[P] Inorganic ion transport and metabolism	0.190282	0.24027	0.0327633	0.0058015	0
CC_3474	CCNA_03588	Two-component sensor histidine kinase	CCNA_03588	[T] Signal transduction mechanisms	0.405675	0.605505	0.0726558	0.0897407	0
CC_3485	CCNA_03599	Aspartate-semialdehyde dehydrogenase	CCNA_03599	[E] Amino acid transport and metabolism	0.209321	0.19163	0.00691882	0.0139849	0
CC_3486	CCNA_03600	Integral membrane protein	CCNA_03600	[R] General function prediction only	0.490216	0.452296	0.100651	0.0111996	0
CC_3497	CCNA_03612	Hypothetical transcriptional regulatory protein	CCNA_03612	Not classified	0.228635	0.16919	0.0635807	0.05585	0
CC_3499	CCNA_03614	Hypothetical protein	CCNA_03614	Not classified	0.476779	0.445907	0.0264182	0.0858591	0
CC_3511	CCNA_03626	ATP phosphoribosyltransferase	CCNA_03626	[E] Amino acid transport and metabolism	0.26844	0.380173	0.0311856	0.0210667	0
CC_3512	CCNA_03627	Probable ATP phosphoribosyltransferase regulatory subunit	CCNA_03627	[E] Amino acid transport and metabolism	0.379272	0.604215	0.0125373	0.0405229	0
CC_3513	CCNA_03628	Histidyl-tRNA synthetase	CCNA_03628	[J] Translation	0.384082	0.577124	0.0367392	0.0171933	0
CC_3521	CCNA_03636	Biotin synthase	CCNA_03636	[H] Coenzyme transport and metabolism	0.409461	0.59198	0.0563853	0.011679	0
CC_3525	CCNA_03640	Ferredoxin--NAD(+) reductase	CCNA_03640	[C] Energy production and conversion	0.398514	0.553615	0.0648643	0.0171846	0
CC_3526	CCNA_03641	Succinate dehydrogenase iron-sulfur protein	CCNA_03641	[C] Energy production and conversion	0.152348	0.18837	0.0172424	0.047189	0
CC_3527	CCNA_03642	Succinate dehydrogenase flavoprotein subunit	CCNA_03642	[C] Energy production and conversion	0.167318	0.200263	0.0194729	0.00691792	0
CC_3528	CCNA_03643	Succinate dehydrogenase membrane anchor subunit	CCNA_03643	[C] Energy production and conversion	0.205644	0.221055	0.017167	0.0587223	0
CC_3543	CCNA_03657	Tryptophan synthase alpha chain	CCNA_03657	[E] Amino acid transport and metabolism	0.157396	0.189966	0.0303202	0.0043784	0
CC_3544	CCNA_03658	Tryptophan synthase beta chain	CCNA_03658	[E] Amino acid transport and metabolism	0.156602	0.214026	0.00655415	0.04109	0
CC_3557	CCNA_03672	Superoxide dismutase	CCNA_03672	[P] Inorganic ion transport and metabolism	0.143914	0.132346	0.00525887	0.0140584	1
CC_3565	CCNA_03680	Aminopeptidase N	CCNA_03680	[E] Amino acid transport and metabolism	0.450653	0.565463	0.0675757	0.141168	0
CC_3572	CCNA_03687	Carbonic anhydrase	CCNA_03687	[P] Inorganic ion transport and metabolism	0.51087	0.660933	0.033467	0.128526	1
CC_3581	CCNA_03696	Acetyl-coenzyme A synthetase	CCNA_03696	[I] Lipid transport and metabolism	0.448855	0.619222	0.0751499	0.0535315	0
CC_3586	CCNA_03701	Integration host factor beta-subunit	CCNA_03701	[L] Replication	0.314954	0.329919	0.0543375	0.0669053	0
CC_3587	CCNA_03702	SSU ribosomal protein S1P	CCNA_03702	[J] Translation	0.0252503	0.0216591	0.00481555	0.00182675	0
CC_3588	CCNA_03703	Cytidylate kinase	CCNA_03703	[F] Nucleotide transport and metabolism	0.399035	0.490145	0.0706917	0.0687595	0
CC_3589	CCNA_03704	3-phosphoshikimate 1-carboxyvinyltransferase	CCNA_03704	[E] Amino acid transport and metabolism	0.25383	0.365464	0.0386867	0.0170146	0
CC_3590	CCNA_03705	Hypothetical protein	CCNA_03705	[S] Function unknown	0.192464	0.210256	0.0083341	0.0529638	0
CC_3592	CCNA_03706	Small heat shock protein	CCNA_03706	[O] Posttranslational modification	0.462294	0.596444	0.0919898	0.124363	1
CC_3600	CCNA_03714	ABC transporter ATP-binding protein	CCNA_03714	[R] General function prediction only	0.46281	0.638755	0.0332865	0.105951	0
CC_3603	CCNA_03717	Ribonuclease D	CCNA_03717	[J] Translation	0.304619	0.327797	0.00686937	0.00910613	0
CC_3606	CCNA_03721	Glutamate synthase [NADPH] small chain	CCNA_03721	[E] Amino acid transport and metabolism	0.207527	0.190553	0.0736143	0.0187395	1
CC_3607	CCNA_03722	Glutamate synthase [NADPH] large chain	CCNA_03722	[E] Amino acid transport and metabolism	0.0611218	0.0852988	7.41018e-05	0.00418858	0
CC_3613	CCNA_03728	Hypothetical protein	CCNA_03728	Not classified	0.355588	0.37637	0.00892056	0.0112487	0
CC_3614	CCNA_03729	Transaldolase-like protein	CCNA_03729	[G] Carbohydrate transport and metabolism	0.185132	0.165599	0.00738986	0.00832384	0
CC_3617	CCNA_03732	Mannose-6-phosphate isomerase	CCNA_03732	[G] Carbohydrate transport and metabolism	0.292468	0.415722	0.0456641	0.0482736	0
CC_3618	CCNA_03733	Mannose-1-phosphate guanylyltransferase (GDP)	CCNA_03733	[M] Cell wall/membrane/envelope biogenesis	0.476932	0.719828	0.0427713	0.102583	0
CC_3620	CCNA_03735	Transketolase	CCNA_03735	[G] Carbohydrate transport and metabolism	0.0951717	0.1292	0.0344859	0.00664351	0
CC_3625	CCNA_03740	Cysteine synthase	CCNA_03740	[E] Amino acid transport and metabolism	0.269157	0.396187	0.06108	0.0884005	0
CC_3630	CCNA_03745	Formyltetrahydrofolate deformylase	CCNA_03745	[F] Nucleotide transport and metabolism	0.107918	0.138956	0.0154659	0.000116199	0
CC_3633	CCNA_03748	dTDP-4-dehydrorhamnose 3,5-epimerase	CCNA_03748	[M] Cell wall/membrane/envelope biogenesis	0.500305	0.490893	0.00315013	0.0229056	0
CC_3635	CCNA_03750	Threonine dehydratase	CCNA_03750	[E] Amino acid transport and metabolism	0.303698	0.336939	0.0295928	0.134685	0
CC_3636	CCNA_03751	Peptidyl-prolyl cis-trans isomerase	CCNA_03751	[O] Posttranslational modification	0.425228	0.453118	0.0839033	0.0102215	0
CC_3637	CCNA_03752	UTP--glucose-1-phosphate uridylyltransferase	CCNA_03752	[M] Cell wall/membrane/envelope biogenesis	0.209038	0.263978	0.0721057	0.0332569	0
CC_3649	CCNA_03764	Acyl-CoA thioesterase	CCNA_03764	[I] Lipid transport and metabolism	0.200346	0.217797	0.0425353	0.0847243	0
CC_3651	CCNA_03766	16S rRNA processing protein rimM	CCNA_03766	[J] Translation	0.221961	0.313853	0.0374113	0.0799932	0
CC_3652	CCNA_03767	SSU ribosomal protein S16P	CCNA_03767	[J] Translation	0.018136	0.0187959	0.00449621	0.000114238	0
CC_3654	CCNA_03769	Hypothetical protein	CCNA_03769	[S] Function unknown	0.480176	0.506098	0.0269741	0.00514984	1
CC_3655	CCNA_03770	Malate dehydrogenase	CCNA_03770	[C] Energy production and conversion	0.385741	0.379969	0.0635771	0.0448725	0
CC_3662	CCNA_03777	Tas protein	CCNA_03777	[C] Energy production and conversion	0.406111	0.620126	0.0436136	0.0265843	0
CC_3667	CCNA_03781	Aconitate hydratase	CCNA_03781	[C] Energy production and conversion	0.105826	0.149173	0.00748077	0.0239601	0
CC_3674	CCNA_03788	Thiol:disulfide interchange protein tlpA	CCNA_03788	[C] Energy production and conversion	0.500367	0.584789	0.00667548	0.0515217	0
CC_3678	CCNA_03792	Intracellular septation protein	CCNA_03792	[D] Cell cycle control	0.184622	0.231277	0.0324696	0.0455712	1
CC_3679	CCNA_03793	Cell division protein ftsY	CCNA_03793	[U] Intracellular trafficking	0.218772	0.305253	0.0686593	0.0392566	1
CC_3684	CCNA_03798	tRNA 2-methylthioadenosine synthase homolog	CCNA_03798	[J] Translation	0.497889	0.520137	0.162937	0.0182544	0
CC_3685	CCNA_03799	Short chain dehydrogenase	CCNA_03799	[R] General function prediction only	0.550645	0.533186	0.0309482	0.0214076	0
CC_3693	CCNA_03807	Organic solvent resistance transport system Ttg2D protein	CCNA_03807	[Q] Secondary metabolites biosynthesis	0.263293	0.303299	0.0228181	0.0311607	1
CC_3714	CCNA_03830	Multidrug resistance protein A	CCNA_03830	[V] Defense mechanisms	0.273766	0.311993	0.0604612	0.0602807	0
CC_3720	CCNA_03836	3-hydroxydecanoyl-[acyl-carrier-protein] dehydratase	CCNA_03836	[I] Lipid transport and metabolism	0.4109	0.530697	0.0809303	0.0857585	0
CC_3723	CCNA_03839	Acylamino-acid-releasing enzyme	CCNA_03839	[E] Amino acid transport and metabolism	0.422404	0.5691	0.0357492	0.0672511	0
CC_3728	CCNA_03844	ATP-dependent endopeptidase hsl ATP-binding subunit hslU	CCNA_03844	[O] Posttranslational modification	0.448722	0.51372	0.0303011	0.0459001	0
CC_3733	CCNA_03849	Fructokinase	CCNA_03849	[G] Carbohydrate transport and metabolism	0.099452	0.119449	0.0213344	0.00890388	0
CC_3734	CCNA_03850	Imidazoleglycerol-phosphate dehydratase	CCNA_03850	[E] Amino acid transport and metabolism	0.0870553	0.143063	0.036139	0.010841	0
CC_3735	CCNA_03851	Imidazole glycerol phosphate synthase, glutamine amidotransferase subunit	CCNA_03851	[E] Amino acid transport and metabolism	0.270585	0.269689	0.0718226	0.0524791	0
CC_3736	CCNA_03852	1-(5-phosphoribosyl)-5-[(5-phosphoribosylamino)methylideneamino] imidazole-4-carboxamide isomerase	CCNA_03852	[E] Amino acid transport and metabolism	0.37788	0.442869	0.0664128	0.0975675	0
CC_3737	CCNA_03853	Imidazole glycerol phosphate synthase, cyclase subunit	CCNA_03853	[E] Amino acid transport and metabolism	0.42414	0.5094	0.0359751	0.0227997	0
CC_3742	CCNA_03858	Protein translocase subunit secB	CCNA_03858	[U] Intracellular trafficking	0.114608	0.0925639	0.0132459	0.00486051	0
CC_3748	CCNA_03864	Hypothetical cytosolic protein	CCNA_03864	Not classified	0.183712	0.266872	0.0281183	0.0325777	0
CC_3749	CCNA_03865	Leucyl-tRNA synthetase	CCNA_03865	[J] Translation	0.193181	0.199867	0.0239488	0.00195761	0
CC_3751	CCNA_03867	DNA polymerase III, delta subunit	CCNA_03867	[L] Replication	0.321338	0.375511	0.115347	0.020072	0
CC_3758	CCNA_03874	Carboxymethylenebutenolidase	CCNA_03874	[Q] Secondary metabolites biosynthesis	0.390957	0.519289	0.0341209	0.114967	0
CC_3761	CCNA_03877	Hypothetical membrane spanning protein	CCNA_03877	[S] Function unknown	0.440571	0.573938	0.0313031	0.0905516	1
CC_2193	CCNA_02275	Hypothetical membrane spanning protein	CC_2193	[P] Inorganic ion transport and metabolism	0.123584	0.0797534	0.00961776	0.0118398	0
CC_3231	CCNA_03339	TolA protein	tolA	[M] Cell wall/membrane/envelope biogenesis	0.376049	0.39522	0.00635585	0.013917	0
CC_3523	CCNA_03638	Hypothetical protein	CC_3523	Not classified	0.270436	0.26102	0.0309887	0.0869526	0
CC_0441	CCNA_00450	cheE protein	cheE	Not classified	0.364734	0.589552	0.045599	0.0153392	1
CC_0439	CCNA_00448	cheU protein	cheU	Not classified	0.315768	0.386672	0.050272	0.0321149	1
CC_0440	CCNA_00449	CheYIII	cheYIII	[T] Signal transduction mechanisms	0.195379	0.222854	0.0741308	0.0957041	1
CC_3470	CCNA_03584	Histidine phosphotransferase chpT	chpT	[S] Function unknown	0.347344	0.322451	0.0662933	0.0484487	1
CC_0053	CCNA_00051	Magnesium and cobalt efflux protein corC	corC	[R] General function prediction only	0.414777	0.570119	0.0375383	0.0335751	0
CC_3406	CCNA_03517	Cytochrome c oxidase polypeptide I coxA	coxA	[C] Energy production and conversion	0.434484	0.451392	0.0392283	0.00548162	0
CC_3407	CCNA_03518	Cytochrome c oxidase polypeptide II coxB	coxB	[C] Energy production and conversion	0.390236	0.385584	0.0628547	0.000990563	0
CC_3405	CCNA_03516	Protoheme IX farnesyltransferase coxE	coxE	[O] Posttranslational modification	0.483496	0.640422	0.00594226	0.0205318	0
CC_2944	CCNA_03039	Pilus assembly protein CpaD	cpaD	[N] Cell motility	0.612411	0.507592	0.0978962	0.0711819	1
CC_2943	CCNA_03038	Pilus assembly ATPase cpaE	cpaE	[U] Intracellular trafficking	0.529109	0.49527	0.130535	0.0224516	1
CC_1195	CCNA_01253	Dihydrodipicolinate synthase	dapA	[E] Amino acid transport and metabolism	0.17444	0.17171	0.00177008	0.0203367	0
CC_2580	CCNA_02663	DnaK suppressor protein dksA	dksA	[T] Signal transduction mechanisms	0.329528	0.389679	0.0714271	0.0330731	0
CC_0011	CCNA_00011	Chaperone protein dnaJ	dnaJ	[O] Posttranslational modification	0.429304	0.452362	0.0819953	0.0135928	1
CC_0010	CCNA_00010	Chaperone protein dnaK	dnaK	[O] Posttranslational modification	0.195248	0.263427	0.0192322	0.00148487	1
CC_2055	CCNA_02134	Phosphogluconate dehydratase	edd	[E] Amino acid transport and metabolism	0.112529	0.183374	0.0051342	0.0111086	0
CC_2335	CCNA_02420	TonB accessory protein exbD	exbD	[U] Intracellular trafficking	0.333198	0.372711	0.0444602	0.0948651	0
CC_0752	CCNA_00789	Hypoxia transcriptional regulator fixK	fixK	[T] Signal transduction mechanisms	0.200035	0.603333	0.0322267	0.228441	0
CC_1077	CCNA_01131	Flagellar biosynthetic protein flhB	flhB	[N] Cell motility	0.510441	0.588207	0.172023	0.124389	0
CC_0905	CCNA_00950	Flagellar M-ring protein fliF	fliF	[N] Cell motility	0.455852	0.373366	0.162132	0.00389562	1
CC_0906	CCNA_00951	Flagellar motor switch protein fliG	fliG	[N] Cell motility	0.491152	0.479557	0.128531	0.0997169	1
CC_3040	CCNA_03135	Flagellum-specific ATP synthase fliL	fliI	[N] Cell motility	0.424759	0.390945	0.12241	0.084694	1
CC_3755	CCNA_03871	Glucose inhibited division protein A	gidA	[D] Cell cycle control	0.469011	0.508846	0.120829	0.188547	1
CC_3754	CCNA_03870	Methyltransferase gidB	gidB	[M] Cell wall/membrane/envelope biogenesis	0.221698	0.408143	0.0910347	0.0943417	1
CC_2054	CCNA_02133	Glucokinase	glk	[G] Carbohydrate transport and metabolism	0.0578425	0.0874585	0.00929935	0.0134271	0
CC_1384	CCNA_01448	Fructose-1,6-bisphosphatase	glpX	[G] Carbohydrate transport and metabolism	0.168913	0.246271	0.0399981	0.0080158	0
CC_1341	CCNA_01403	Glycyl-tRNA synthetase alpha chain	glyQ	[J] Translation	0.137971	0.1987	0.0231389	0.0994684	0
CC_1342	CCNA_01404	Glycyl-tRNA synthetase beta chain	glyS	[J] Translation	0.111436	0.153751	0.0109794	0.0444147	0
CC_2848	CCNA_02941	Transcription elongation factor greA	greA	[K] Transcription	0.321561	0.346566	0.0275807	0.0328336	0
CC_0160	CCNA_00159	DNA gyrase subunit B	gyrB	[L] Replication	0.190684	0.287084	0.0328691	0.0426289	1
CC_2431	CCNA_02513	Frameshifted variant of holdfast synthesis gene hfsA	hfsA	[M] Cell wall/membrane/envelope biogenesis	0.694329	0.507113	0.229119	0.0825276	0
CC_0499	CCNA_00533	Secreted polysaccharide polymerase hfsI	hfsI	[M] Cell wall/membrane/envelope biogenesis	0.478857	0.545202	0.0675154	0.0538174	0
CC_2241	CCNA_02324	Heat shock protein 33 hsp33	hsp33	[O] Posttranslational modification	0.309334	0.416255	0.0927025	0.0514895	0
CC_0683	CCNA_00719	Type I secretion adaptor protein hlyD	hylD	[V] Defense mechanisms	0.257612	0.459647	0.042582	0.0117521	0
CC_1034	CCNA_01086	GTP-binding protein lepA	lepA	[M] Cell wall/membrane/envelope biogenesis	0.304337	0.324162	0.0722516	0.0788066	0
CC_0193	CCNA_00193	3-isopropylmalate dehydrogenase	leuB	[C] Energy production and conversion	0.191351	0.234181	0.0440197	0.0392862	0
CC_0196	CCNA_00196	3-isopropylmalate dehydratase large subunit	leuC	[E] Amino acid transport and metabolism	0.218186	0.222978	0.0532076	0.0564611	0
CC_0195	CCNA_00195	3-isopropylmalate dehydratase small subunit	leuD	[E] Amino acid transport and metabolism	0.180611	0.25446	0.0283852	0.00937003	0
CC_0084	CCNA_00082	Class 1 lysyl-tRNA synthetase	lysS	[J] Translation	0.180158	0.191027	0.0353536	0.0416002	0
CC_2287	CCNA_02370	TonB-dependent maltose outer membrane transporter malA	malA	[P] Inorganic ion transport and metabolism	0.0902839	1.28172	0.0383117	0.407171	0
CC_0050	CCNA_00048	S-adenosylmethionine synthetase	metK	[H] Coenzyme transport and metabolism	0.0181018	0.018241	0.00162448	0.000724235	1
CC_1916	CCNA_01993	Membrane endopeptidase, M50 family mmpA	mmpA	[M] Cell wall/membrane/envelope biogenesis	0.162752	0.197256	0.0371709	0.0319299	0
CC_0015	CCNA_00015	Molybdenum cofactor biosynthesis protein B	moaB	[H] Coenzyme transport and metabolism	0.401148	0.513027	0.0605184	0.0987551	0
CC_0065	CCNA_00063	Virulence factor mviN	mviN	[R] General function prediction only	0.410441	0.538737	0.051399	0.0497615	0
CC_1956	CCNA_02033	NADH-quinone oxidoreductase chain A	nuoA	[C] Energy production and conversion	0.246198	0.268024	0.0753627	0.0336328	1
CC_1955	CCNA_02032	NADH-quinone oxidoreductase chain B	nuoB	[C] Energy production and conversion	0.269106	0.303589	0.00876596	0.00457313	0
CC_1954	CCNA_02031	NADH-quinone oxidoreductase chain C	nuoC	[C] Energy production and conversion	0.211904	0.227678	0.0343313	0.0132966	1
CC_1952	CCNA_02029	NADH-quinone oxidoreductase chain D	nuoD	[C] Energy production and conversion	0.212733	0.233968	0.00996339	0.0403576	1
CC_1950	CCNA_02027	NADH-quinone oxidoreductase chain E	nuoE	[C] Energy production and conversion	0.138329	0.144476	0.00953758	0.00219789	1
CC_1947	CCNA_02024	NADH-quinone oxidoreductase chain F	nuoF	[C] Energy production and conversion	0.0893061	0.0982409	0.016434	0.0106402	1
CC_1946	CCNA_02023	NADH-quinone oxidoreductase chain G	nuoG	[C] Energy production and conversion	0.103527	0.0993128	0.0298276	0.000353724	1
CC_1945	CCNA_02022	NADH-quinone oxidoreductase chain H	nuoH	[C] Energy production and conversion	0.112323	0.108931	0.0150021	0.00393267	0
CC_1942	CCNA_02020	NADH-quinone oxidoreductase chain I	nuoI	[C] Energy production and conversion	0.156488	0.146983	0.0340987	0.00423488	1
CC_1941	CCNA_02019	NADH-quinone oxidoreductase chain J	nuoJ	[C] Energy production and conversion	0.261852	0.193004	0.0731672	0.0466534	0
CC_1940	CCNA_02018	NADH-quinone oxidoreductase chain K	nuoK	[C] Energy production and conversion	0.209098	0.0994565	0.0723401	0.0124637	1
CC_1939	CCNA_02017	NADH-quinone oxidoreductase chain L	nuoL	[C] Energy production and conversion	0.199408	0.108136	0.047321	0.0189916	1
CC_1938	CCNA_02016	NADH-quinone oxidoreductase chain M	nuoM	[C] Energy production and conversion	0.152472	0.109153	0.0113963	0.00472525	0
CC_1937	CCNA_02015	NADH-quinone oxidoreductase chain N	nuoN	[C] Energy production and conversion	0.224292	0.206768	0.0224118	0.0245732	0
CC_0340	CCNA_00343	Dihydrolipoamide succinyltransferase component (E2) of 2-oxoglutarate dehydrogenase complex	odhB	[C] Energy production and conversion	0.437289	0.504798	0.0309334	0.0821868	0
CC_3753	CCNA_03869	Chromosome partitioning protein parA	parA	[D] Cell cycle control	0.274943	0.435772	0.0474436	0.0929055	1
CC_3752	CCNA_03868	Chromosome partitioning protein parB	parB	[K] Transcription	0.207531	0.294028	0.0390305	0.0938832	1
CC_2056	CCNA_02135	6-phosphogluconolactonase	pgl	[G] Carbohydrate transport and metabolism	0.0866541	0.134913	0.0209758	0.0140232	1
CC_0055	CCNA_00053	Phosphate starvation-inducible protein phoH	phoH	[T] Signal transduction mechanisms	0.348487	0.438406	0.0111895	0.0149085	0
CC_1305	CCNA_01363	Sensor protein phoQ	phoQ	[T] Signal transduction mechanisms	0.526286	0.721802	0.0284672	0.0249172	0
CC_0293	CCNA_00295	Phosphate transport system protein phoU	phoU	[P] Inorganic ion transport and metabolism	0.408609	0.372029	0.102977	0.0725082	0
CC_2384	CCNA_02467	polyisoprenylphosphate hexose-1-phosphotransferase pssZ	pssZ	[M] Cell wall/membrane/envelope biogenesis	0.321472	0.439385	0.0199535	0.044332	1
CC_0291	CCNA_00293	Phosphate transport system permease protein pstA	pstA	[P] Inorganic ion transport and metabolism	0.343363	0.207738	0.037883	0.0326698	1
CC_0292	CCNA_00294	Phosphate transport ATP-binding protein pstB	pstB	[P] Inorganic ion transport and metabolism	0.265057	0.255872	0.00128968	0.0331085	1
CC_0290	CCNA_00292	Phosphate transport system permease protein pstC	pstC	[P] Inorganic ion transport and metabolism	0.348844	0.433723	0.094213	0.0917377	1
CC_0086	CCNA_00084	Phosphoribosylaminoimidazolecarboxamide formyltransferase / IMP cyclohydrolase	purH	[F] Nucleotide transport and metabolism	0.129141	0.153491	0.0467747	0.00768223	1
CC_1771	CCNA_01849	Quinol cytochrome oxidase polypeptide III	qoxC	[C] Energy production and conversion	0.430406	0.600237	0.198635	0.380762	1
CC_1770	CCNA_01848	Quinol cytochrome oxidase polypeptide IV	qoxD	[C] Energy production and conversion	0.678161	0.500617	0.072769	0.219517	1
CC_3760	CCNA_03876	Transcription termination factor rho	rho	[K] Transcription	0.0577849	0.0817847	0.00731015	0.00993207	0
CC_0888	CCNA_00932	6,7-dimethyl-8-ribityllumazine synthase	ribH	[H] Coenzyme transport and metabolism	0.336691	3.58064	0.106908	0.568698	1
CC_1251	CCNA_01309	LSU ribosomal protein L2P	rplB	[J] Translation	0.0195388	0.0215304	0.0049383	0.0054829	1
CC_1248	CCNA_01306	LSU ribosomal protein L3P	rplC	[J] Translation	0.0220435	0.0243644	0.00234718	0.00227659	1
CC_1249	CCNA_01307	LSU ribosomal protein L1E (= L4P)	rplD	[J] Translation	0.0192702	0.0205344	0.00111394	0.00158677	1
CC_1260	CCNA_01318	LSU ribosomal protein L5P	rplE	[J] Translation	0.0757055	0.019014	0.0267587	0.00213435	1
CC_1263	CCNA_01321	LSU ribosomal protein L6P	rplF	[J] Translation	0.144507	0.0449265	0.0474256	0.00695935	1
CC_1258	CCNA_01316	LSU ribosomal protein L14P	rplN	[J] Translation	0.0443685	0.0185631	0.0196742	0.00251861	1
CC_1267	CCNA_01325	LSU ribosomal protein L15P	rplO	[J] Translation	0.116663	0.115707	0.0154519	0.00558594	1
CC_1255	CCNA_01313	LSU ribosomal protein L16P	rplP	[J] Translation	0.0293939	0.0198268	0.00221453	0.00169234	0
CC_1273	CCNA_01332	LSU ribosomal protein L17P	rplQ	[J] Translation	0.0545185	0.0715749	8.306e-05	0.0249117	0
CC_1264	CCNA_01322	LSU ribosomal protein L18P	rplR	[J] Translation	0.184091	0.0598586	0.0534767	0.000171526	1
CC_0197	CCNA_00197	LSU ribosomal protein L19P	rplS	[J] Translation	0.0859583	0.0977444	0.0040517	0.00110122	1
CC_1253	CCNA_01311	LSU ribosomal protein L22P	rplV	[J] Translation	0.014902	0.0132813	0.000950167	0.00118226	0
CC_1250	CCNA_01308	LSU ribosomal protein L23P	rplW	[J] Translation	0.0168042	0.0219606	0.000750807	0.000955423	0
CC_1259	CCNA_01317	LSU ribosomal protein L24P	rplX	[J] Translation	0.0704463	0.0321538	0.0245733	0.00256805	1
CC_1256	CCNA_01314	LSU ribosomal protein L29P	rpmC	[J] Translation	0.0533383	0.0536824	0.000942146	0.0165577	0
CC_1266	CCNA_01324	LSU ribosomal protein L30P	rpmD	[J] Translation	0.108071	0.0753106	0.000398813	0.00191397	0
CC_1272	CCNA_01330	DNA-directed RNA polymerase alpha chain	rpoA	[K] Transcription	0.0609369	0.0793865	0.00242409	0.00818172	1
CC_1254	CCNA_01312	SSU ribosomal protein S3P	rpsC	[J] Translation	0.0178776	0.0173955	0.00276597	0.000626479	1
CC_1265	CCNA_01323	SSU ribosomal protein S5P	rpsE	[J] Translation	0.190574	0.0647776	0.0463997	0.0088799	1
CC_1262	CCNA_01320	SSU ribosomal protein S8P	rpsH	[J] Translation	0.121859	0.0397225	0.0406616	0.00347796	1
CC_1247	CCNA_01305	SSU ribosomal protein S10P	rpsJ	[J] Translation	0.0249535	0.0202269	0.00565544	0.00228908	1
CC_1271	CCNA_01329	SSU ribosomal protein S11P	rpsK	[J] Translation	0.0883556	0.0765187	0.00169108	0.00984154	1
CC_1270	CCNA_01328	SSU ribosomal protein S13P	rpsM	[J] Translation	0.0682803	0.0760972	0.00879087	0.0151759	1
CC_1261	CCNA_01319	SSU ribosomal protein S14P	rpsN	[J] Translation	0.107929	0.0423661	0.0227425	0.00387463	0
CC_1257	CCNA_01315	SSU ribosomal protein S17P	rpsQ	[J] Translation	0.0318889	0.0170427	0.0120226	0.000698939	1
CC_1252	CCNA_01310	SSU ribosomal protein S19P	rpsS	[J] Translation	0.0258607	0.0247657	0.00105238	0.000472436	0
CC_1009	CCNA_01061	Type I secretion adaptor protein rsaE	rsaE	[V] Defense mechanisms	0.388488	0.590466	0.0862194	0.0994469	0
CC_1015	CCNA_01067	Type I secretion outer membrane protein rsaFa	rsaFa	[M] Cell wall/membrane/envelope biogenesis	0.312067	0.282146	0.0352794	0.0615951	0
CC_3529	CCNA_03644	Succinate dehydrogenase cytochrome B-556 subunit	sdhC	[C] Energy production and conversion	0.187726	0.274265	0.0112709	0.0859031	0
CC_1268	CCNA_01326	Protein translocase subunit secY	secY	[U] Intracellular trafficking	0.102042	0.109023	0.00151653	0.00661225	0
CC_1196	CCNA_01254	SsrA-binding protein	smpB	[O] Posttranslational modification	0.271584	0.308934	0.0766655	0.0487362	0
CC_3653	CCNA_03768	Signal recognition particle GTPase, SRP	srp	[U] Intracellular trafficking	0.0982442	0.0973186	0.00048444	0.0170712	0
CC_0338	CCNA_00341	Succinyl-CoA synthetase alpha chain	sucD	[C] Energy production and conversion	0.206495	0.20373	0.00190731	0.0142473	0
CC_0635	CCNA_00671	Teichoic acid translocation permease protein tagG	tagG	[G] Carbohydrate transport and metabolism	0.167756	0.212277	0.0666264	0.0139384	0
CC_2029	CCNA_02109	Thiamine biosynthesis protein thiC	thiC	[H] Coenzyme transport and metabolism	0.18887	0.265319	0.00368174	0.0478456	0
CC_3233	CCNA_03341	TolQ protein	tolQ	[U] Intracellular trafficking	0.275339	0.284439	0.0350081	0.0298413	0
CC_3232	CCNA_03340	TolR protein	tolR	[U] Intracellular trafficking	0.45144	0.567734	0.00336051	0.074629	0
CC_2334	CCNA_02419	TonB1 protein	tonB1	[A] RNA processing and modification	0.375939	0.52264	0.0451178	0.0997937	0
CC_0198	CCNA_00198	tRNA (Guanine-N1) -methyltransferase	trmD	[J] Translation	0.0827434	0.101893	0.00862242	0.0223729	0
CC_0064	CCNA_00062	Tryptophanyl-tRNA synthetase	trpS	[J] Translation	0.412488	0.904232	0.065041	0.208851	0
CC_3709	CCNA_03824	2-polyprenylphenol 6-hydroxylase accessory protein ubiB	ubiB	[R] General function prediction only	0.389291	0.479146	0.0637866	0.226457	0
CC_0820	CCNA_00863	xylonolactonase xylC	xylC	[G] Carbohydrate transport and metabolism	0.280255	0.397462	0.0171026	0.0106955	0
CC_0767	CCNA_00806	Inner membrane protein translocase component yidC	yidC	[U] Intracellular trafficking	0.0625958	0.0784246	0.00716848	0.0117497	0
CC_0766	CCNA_00805	GTP-binding protein YihA	yihA	[R] General function prediction only	0.228862	0.270534	0.0407696	0.0384702	0
CC_2057	CCNA_02136	Glucose-6-phosphate 1-dehydrogenase	zwf	[G] Carbohydrate transport and metabolism	0.102546	0.184346	0.00257866	0.00410116	0
