# Supplementary material for: Regulatory Response to Carbon Starvation in Caulobacter crescentus
Source: PLoS One. 2011 Apr 11;6(4):e18179. doi: 10.1371/journal.pone.0018179 (PMC3073932; doi:10.1371/journal.pone.0018179)
Supplement: Table S4 — List of genes that change significantly upon carbon starvation in the sets represented in Figure 2 . Gene ID (for strains CB15 and CB15N), annotation, and fold change between starved and non-starved cells at 30 min (except for motif cc_7, for which the values correspond to 60 min) are shown. (XLS) [file pone.0018179.s004.xls]

## Sheet: cc_ motifs
Table S4. List of genes that change significantly upon carbon starvation in the sets represented in Figure 2 in the paper "Regulatory Response to Carbon Starvation in Caulobacter crescentus" by Britos et al.
Gene ID CB15	Gene ID NA1000	Annotation	Fold change starved/control
motif cc_1 up-regulated
CC_0148	CCNA_00147	Hypothetical protein	3.12099
CC_0224	CCNA_00224	Conserved hypothetical protein (putative porin)	2.81424
CC_0412	CCNA_00417	Hypothetical protein	14.517
CC_0446	CCNA_00455	N-acetyl-glucosamine/N-acetyl-chitin oligosaccharide outer membrane transporter nagA	6.94074
CC_0696	CCNA_00732	GumN superfamily protein	4.71826
CC_1613	CCNA_01685	Hemimethylated DNA-binding protein yccV	2.46634
CC_1891	CCNA_01968	Hypothetical protein with pentapeptide repeats	6.06127
CC_2778	CCNA_02866	Conserved membrane protein	2.95922
CC_3003	CCNA_03098	Conserved hypothetical protein	3.11319
CC_3073	CCNA_03169	Conserved hypothetical protein	2.85383
CC_3287	CCNA_03396	Trypsin-like serine proteases, typically periplasmic, contain C-terminal PDZ domain	7.41774
CC_3408	CCNA_03519	Transcriptional regulator, PadR family	2.42646
motif cc_2 up-regulated
CC_1024	CCNA_01076	Beta/Gamma crystallin domain protein	3.04698
CC_1303	CCNA_01361	Hypothetical protein	2.9358
CC_1325	CCNA_01386	Conserved hypothetical protein	3.40636
CC_1613	CCNA_01685	Hemimethylated DNA-binding protein yccV	2.46634
CC_2067	CCNA_02146	hypothetical protein	2.12317
CC_2121	CCNA_02205	Conserved hypothetical protein	2.90054
CC_2294	CCNA_02378	Hypothetical protein	4.10796
CC_2435	CCNA_02517	Conserved hypothetical protein	5.35953
CC_2512	CCNA_02597	Conserved hypothetical protein	2.5567
CC_3073	CCNA_03169	Conserved hypothetical protein	2.85383
CC_3220	CCNA_03327	Hypothetical protein	4.42245
motif cc_3 up-regulated
CC_0762	CCNA_00800	Cytochrome bd-type quinol oxidase, subunit 1 cydA	4.52569
CC_1401	CCNA_01467	Cytochrome cbb3 oxidase subunit I ccoN	4.03371
CC_1409	CCNA_01475	OmpW family outer membrane protein	2.77525
CC_2111	CCNA_02196	Hypothetical membrane spanning protein	7.86379
CC_3455	CCNA_03568	LemA protein	6.50837
motif cc_4 up-regulated
CC_0762	CCNA_00800	Cytochrome bd-type quinol oxidase, subunit 1 cydA	4.52569
CC_1401	CCNA_01467	Cytochrome cbb3 oxidase subunit I ccoN	4.03371
CC_1409	CCNA_01475	OmpW family outer membrane protein	2.77525
CC_2111	CCNA_02196	Hypothetical membrane spanning protein	7.86379
CC_3455	CCNA_03568	LemA protein	6.50837
motif cc_6 down-regulated
CC_0129	CCNA_00128	Argininosuccinate synthase	0.0892872
CC_0253	CCNA_00253	Aspartate-semialdehyde dehydrogenase	0.13048
CC_0487	CCNA_00520	Ribose-phosphate pyrophosphokinase	0.136933
CC_0654	CCNA_00691	Ferredoxin	0.0498029
CC_0721	CCNA_00758	Protein Translation Elongation Factor P (EF-P)	0.148331
CC_0925	CCNA_00974	OAR protein precursor	0.346341
CC_1316	CCNA_01376	Glutathione S-transferase	0.488339
CC_1534	CCNA_01603	Aspartate aminotransferase	0.220698
CC_1555	CCNA_01624	Orotate phosphoribosyltransferase	0.271155
CC_1577	CCNA_01648	Adenosylmethionine-8-amino-7-oxononanoate aminotransferase	0.291448
CC_1596	CCNA_01668	Sulfate transport system permease protein cysT	0.378488
CC_1699	CCNA_01770	Nucleoside diphosphate kinase	0.0469013
CC_1724	CCNA_01795	Enolase	0.121488
CC_2109	CCNA_02194	Fumarate hydratase	0.243711
CC_2261	CCNA_02344	Phosphoglycerate mutase	0.0414468
CC_2295	CCNA_02380	Aspartate 1-decarboxylase	0.377706
CC_2456	CCNA_02540	N-acyl-L-amino acid amidohydrolase	0.19628
CC_2487	CCNA_02572	Adenylosuccinate lyase	0.112768
CC_2664	CCNA_02747	ABC transporter substrate-binding protein	0.145041
CC_2820	CCNA_02911	hypothetical protein	0.168589
CC_2929	CCNA_03024	Branched-chain amino acid aminotransferase	0.113531
CC_3216	CCNA_03323	Phosphoserine aminotransferase	0.150835
CC_3243	CCNA_03352	Hypothetical cytosolic protein	0.247191
CC_3248	CCNA_03358	Glyceraldehyde 3-phosphate dehydrogenase	0.232575
CC_3465	CCNA_03578	ATP-dependent DNA helicase recQ	0.323997
CC_3469	CCNA_03582	3'(2'),5'-bisphosphate nucleotidase / Myo-inositol 1-(4-)phosphatase	0.164177
CC_3614	CCNA_03729	Transaldolase-like protein	0.182087
CC_3625	CCNA_03740	Cysteine synthase	0.251998
motif cc_7 up-regulated
CC_0074	CCNA_00072	Conserved hypothetical protein	2.80783
CC_0201	CCNA_00201	Outer membrane protein	2.57117
CC_0260	CCNA_00261	Ribonucleoside-diphosphate reductase beta chain	3.09269
CC_0280	CCNA_00282	Conserved cell surface protein	10.3519
CC_0938	CCNA_00987	Hypothetical protein	2.7817
CC_1179	CCNA_01237	hypothetical protein	2.68778
CC_1682	CCNA_01754	Transglycosylase associated protein	2.76838
CC_2377	CCNA_02462	Hypothetical protein	2.99389
CC_2549	CCNA_02632	Putative heme-binding protein	10.862
CC_2883	CCNA_02977	RNA polymerase ECF-type sigma factor sigU	8.77244
CC_3225	CCNA_03333	PAS-family sensor histidine kinase	3.20721
CC_3476	CCNA_03590	Conserved hypothetical protein	2.0006
CC_3477	CCNA_03591	Hybrid sigma factor/two-component receiver protein phyR	2.77036
CC_3559	CCNA_03674	Hypothetical protein	2.7734
motif cc_8 up-regulated
CC_0386	CCNA_00390	ADP-heptose--LPS heptosyltransferase	5.38627
CC_2165	CCNA_02246	division plane positioning ATPase mipZ	5.88208
CC_2540	CCNA_02623	Cell division protein ftsZ	2.1519
CC_3218	CCNA_03325	Hypothetical protein	2.11528
CC_3337	CCNA_03445	Aminopeptidase	9.21749
motif cc_13 down-regulated
CC_0139	CCNA_00138	Iron(III) dicitrate transport protein fecA	0.360168
CC_0214	CCNA_00214	TonB-dependent receptor	0.380673
CC_0711	CCNA_00748	Ferrous iron transport protein A	0.184722
CC_2193	CCNA_02275	Hypothetical membrane spanning protein	0.122771
CC_2194	CCNA_02277	Hemin receptor	0.136438
CC_2928	CCNA_03023	TonB-dependent receptor	0.152878
CC_3059	CCNA_03155	Transporter	0.239861
CC_3263	CCNA_03372	Bacterioferritin-associated ferredoxin	0.214429
