# Supplementary material for: Regulatory Response to Carbon Starvation in Caulobacter crescentus
Source: PLoS One. 2011 Apr 11;6(4):e18179. doi: 10.1371/journal.pone.0018179 (PMC3073932; doi:10.1371/journal.pone.0018179)
Supplement: Table S5 — List of genes in the clusters represented in Figure 3B . Gene ID (for strains CB15 and CB15N), log-2 ratio of transcript levels of starved and non-starved swarmer (SW) and stalked (ST) cells after 15 min, annotation, and COG category (if applicable), are shown for all genes clustered in Figure 3B. (XLS) [file pone.0018179.s005.xls]

## Sheet: contents
Table S5. List of genes in the clusters represented in Figure 3B in the paper "Regulatory Response to Carbon Starvation in Caulobacter crescentus" by Britos et al.

## Sheet: 1 SW-no-change-and-ST-down
Cluster 1 - SW no change, ST down									Cluster 1 - SW no change, ST down
Gene ID CB15	Gene ID NA1000	log-2 ratio SW starved/no starved	log-2 ratio ST starved/no starved	Annotation	COG category				Gene ID CB15	Gene ID NA1000	log-2 ratio SW starved/no starved	log-2 ratio ST starved/no starved	Annotation	COG category
CC0339	CCNA_00342	-0.947201	-2.02758	2-oxoglutarate dehydrogenase E1 component	[C] Energy production and conversion				CC0339	CCNA_00342	-0.947201	-2.02758	2-oxoglutarate dehydrogenase E1 component	[C] Energy production and conversion
CC1725	CCNA_01797	-0.665034	-1.93991	Septum formation initiator	[D] Cell cycle control				CC1725	CCNA_01797	-0.665034	-1.93991	Septum formation initiator	[D] Cell cycle control
CC2541	CCNA_02624	-0.517877	-1.63265	Cell division protein ftsA	[D] Cell cycle control				CC2541	CCNA_02624	-0.517877	-1.63265	Cell division protein ftsA	[D] Cell cycle control
CC1471	CCNA_01538	-0.956824	-2.23761	Pyruvate,phosphate dikinase	[G] Carbohydrate transport and metabolism				CC1471	CCNA_01538	-0.956824	-2.23761	Pyruvate,phosphate dikinase	[G] Carbohydrate transport and metabolism
CC1936	CCNA_02014	-0.834731	-1.75155	Biotin operon repressor / Biotin--[acetyl-CoA-carboxylase] synthetase	[H] Coenzyme transport and metabolism				CC1936	CCNA_02014	-0.834731	-1.75155	Biotin operon repressor / Biotin--[acetyl-CoA-carboxylase] synthetase	[H] Coenzyme transport and metabolism
CC0378	CCNA_00382	0.502916	-1.90731	Adenine-specific methyltransferase ccrM	[L] Replication				CC0378	CCNA_00382	0.502916	-1.90731	Adenine-specific methyltransferase ccrM	[L] Replication
CC3751	CCNA_03867	-0.766343	-1.63658	DNA polymerase III, delta subunit	[L] Replication				CC3751	CCNA_03867	-0.766343	-1.63658	DNA polymerase III, delta subunit	[L] Replication
CC0436	CCNA_00445	-0.704749	-1.86361	Receiver domain-glutamate methylesterase cheBI	[N] Cell motility				CC0436	CCNA_00445	-0.704749	-1.86361	Receiver domain-glutamate methylesterase cheBI	[N] Cell motility
CC0905	CCNA_00950	0.472097	-1.78358	Flagellar M-ring protein fliF	[N] Cell motility				CC0905	CCNA_00950	0.472097	-1.78358	Flagellar M-ring protein fliF	[N] Cell motility
CC2062	CCNA_02141	-0.211374	-1.60093	Flagellar fliL protein	[N] Cell motility				CC2062	CCNA_02141	-0.211374	-1.60093	Flagellar fliL protein	[N] Cell motility
CC0028	CCNA_00028	-0.900676	-3.54553	TonB-dependent receptor	[P] Inorganic ion transport and metabolism				CC0028	CCNA_00028	-0.900676	-3.54553	TonB-dependent receptor	[P] Inorganic ion transport and metabolism
CC0711	CCNA_00748	-0.430184	-2.01031	Ferrous iron transport protein A	[P] Inorganic ion transport and metabolism				CC0711	CCNA_00748	-0.430184	-2.01031	Ferrous iron transport protein A	[P] Inorganic ion transport and metabolism
CC0712	CCNA_00749	-0.624096	-1.88589	Ferrous iron transport protein B	[P] Inorganic ion transport and metabolism				CC0712	CCNA_00749	-0.624096	-1.88589	Ferrous iron transport protein B	[P] Inorganic ion transport and metabolism
CC1425	CCNA_01492	-0.546104	-1.924	3-mercaptopyruvate sulfurtransferase	[P] Inorganic ion transport and metabolism				CC1425	CCNA_01492	-0.546104	-1.924	3-mercaptopyruvate sulfurtransferase	[P] Inorganic ion transport and metabolism
CC1517	CCNA_01585	-0.201508	-2.8274	Ferrichrome-iron receptor	[P] Inorganic ion transport and metabolism				CC1517	CCNA_01585	-0.201508	-2.8274	Ferrichrome-iron receptor	[P] Inorganic ion transport and metabolism
CC2193	CCNA_02275	-0.957579	-2.26915	Hypothetical membrane spanning protein	[P] Inorganic ion transport and metabolism				CC2193	CCNA_02275	-0.957579	-2.26915	Hypothetical membrane spanning protein	[P] Inorganic ion transport and metabolism
CC2928	CCNA_03023	-0.276756	-2.07616	TonB-dependent receptor	[P] Inorganic ion transport and metabolism				CC2928	CCNA_03023	-0.276756	-2.07616	TonB-dependent receptor	[P] Inorganic ion transport and metabolism
CC3263	CCNA_03372	-0.59195	-2.94089	Bacterioferritin-associated ferredoxin	[P] Inorganic ion transport and metabolism				CC3263	CCNA_03372	-0.59195	-2.94089	Bacterioferritin-associated ferredoxin	[P] Inorganic ion transport and metabolism
CC3470	CCNA_03584	-0.993577	-1.94329	Histidine phosphotransferase chpT	[S] Function unknown				CC3470	CCNA_03584	-0.993577	-1.94329	Histidine phosphotransferase chpT	[S] Function unknown
CC0437	CCNA_00446	-0.490338	-1.84446	Chemotaxis receiver domain protein cheYII	[T] Signal transduction mechanisms				CC0437	CCNA_00446	-0.490338	-1.84446	Chemotaxis receiver domain protein cheYII	[T] Signal transduction mechanisms
CC2249	CCNA_02332	-0.855367	-1.99133	chemotaxis receiver protein cheYIII	[T] Signal transduction mechanisms				CC2249	CCNA_02332	-0.855367	-1.99133	chemotaxis receiver protein cheYIII	[T] Signal transduction mechanisms
CC0683	CCNA_00719	-0.796014	-2.13264	Type I secretion adaptor protein hlyD	[V] Defense mechanisms				CC0683	CCNA_00719	-0.796014	-2.13264	Type I secretion adaptor protein hlyD	[V] Defense mechanisms
CC0684	CCNA_00720	-0.32792	-1.63512	Type I protein secretion ATP-binding protein / Type I protein secretion transmembrane subunit / Type I secretion processing peptidase	[V] Defense mechanisms				CC0684	CCNA_00720	-0.32792	-1.63512	Type I protein secretion ATP-binding protein / Type I protein secretion transmembrane subunit / Type I secretion processing peptidase	[V] Defense mechanisms
CC0439	CCNA_00448	-0.489771	-1.63156	cheU protein	[T] Signal transduction mechanisms				CC0439	CCNA_00448	-0.489771	-1.63156	cheU protein	[T] Signal transduction mechanisms
CC0599	CCNA_00635	-0.903596	-1.98389	Hypothetical protein	Not classified				CC0599	CCNA_00635	-0.903596	-1.98389	Hypothetical protein	Not classified
CC0682		-0.10077	-1.73463	hypothetical protein	Not classified				CC0682		-0.10077	-1.73463	hypothetical protein	Not classified
CC3061	CCNA_03157	-0.854783	-3.60695	Hypothetical membrane spanning protein	Not classified				CC3061	CCNA_03157	-0.854783	-3.60695	Hypothetical membrane spanning protein	Not classified

## Sheet: 2 SW-up-and-ST-no-change
Cluster 2 - SW up, ST no change
Gene ID CB15	Gene ID NA1000	log-2 ratio SW starved/no starved	log-2 ratio ST starved/no starved	Annotation	COG category
CC_3085	CCNA_03181	2.60102	-0.179164	Alcohol dehydrogenase	[C] Energy production and conversion
CC_3576	CCNA_03691	2.44867	-0.125861	IolS protein	[C] Energy production and conversion
CC_2152	CCNA_02235	1.64554	0.737609	Putative secreted protein	[E] Amino acid transport and metabolism
CC_1101	CCNA_01157	2.26912	0.869627	Protoporphyrinogen oxidase	[H] Coenzyme transport and metabolism
CC_3162	CCNA_03265	2.41507	0.684286	CBS pair-family sensor histidine kinase/receiver domain protein	[K] Transcription
CC_3219	CCNA_03326	2.0915	0.576815	Two-component sensor histidine kinase	[K] Transcription
CC_1876	CCNA_01952	1.97781	0.40185	N-acetylmuramoyl-L-alanine amidase	[M] Cell wall/membrane/envelope biogenesis
CC_0343	CCNA_00348	1.65886	-0.606898	Probable chemoreceptor Y4FA	[N] Cell motility
CC_0430	CCNA_00439	2.55969	-0.503719	Methyl-accepting chemotaxis protein	[N] Cell motility
CC_0504	CCNA_00537	2.48662	-0.037995	DNA-directed RNA polymerase beta' chain	[N] Cell motility
CC_0764	CCNA_00803	2.08061	0.615579	Chemotaxis protein cheW	[N] Cell motility
CC_1458	CCNA_01525	2.24616	0.708409	FlbT protein	[N] Cell motility
CC_0450	CCNA_00459	1.59298	0.480526	Na+/H+ antiporter nhaA	[P] Inorganic ion transport and metabolism
CC_3461	CCNA_03574	1.90326	0.299741	TonB-dependent receptor	[P] Inorganic ion transport and metabolism
CC_1364	CCNA_01426	2.5537	0.308787	Chemotaxis receiver domain protein cheYIII	[T] Signal transduction mechanisms
CC_1850	CCNA_01926	2.06999	0.483807	Two-component response regulator	[T] Signal transduction mechanisms
CC_3145	CCNA_03247	2.28514	-0.099716	Methyl-accepting chemotaxis protein	[T] Signal transduction mechanisms
CC_3315	CCNA_03424	1.70427	-0.190175	AAA-family response regulator tacA	[T] Signal transduction mechanisms
CC_0199	CCNA_00199	2.2368	0.190277	Hypothetical protein	[U] Intracellular trafficking
CC_0236	CCNA_00236	1.82972	0.0449977	Conserved hypothetical protein	Not classified
CC_0693	CCNA_00729	1.70061	-0.322323	Hypothetical protein	Not classified
CC_1066	CCNA_01119	1.80196	0.930256	Hypothetical protein	Not classified
CC_2450	CCNA_02533	1.65661	-0.0722847	hypothetical protein	Not classified
CC_2831	CCNA_02922	2.37796	0.896445	hypothetical protein	Not classified

## Sheet: 3 SW-up-and-ST-up
Cluster 3 - SW up, ST up
Gene ID CB15	Gene ID NA1000	log-2 ratio SW starved/no starved	log-2 ratio ST starved/no starved	Annotation	COG category
CC0021	CCNA_00022	3.64825	3.90836	Putative aerobic-type carbon monoxide dehydrogenase, large subunit coxL	[C] Energy production and conversion
CC0022	CCNA_00095	2.23291	2.91875	Putative aerobic-type carbon monoxide dehydrogenase, small subunit coxS	[C] Energy production and conversion
CC0096	CCNA_00424	3.51084	3.17399	Quinone oxidoreductase	[C] Energy production and conversion
CC0419	CCNA_01274	1.78191	2.63023	Aldehyde dehydrogenase	[C] Energy production and conversion
CC1216	CCNA_01277	1.80612	2.4352	piperideine-6-carboxylate dehydrogenase	[C] Energy production and conversion
CC1219	CCNA_01425	2.20881	3.19547	D-sorbitol oxidase	[C] Energy production and conversion
CC1363	CCNA_01462	3.22746	2.86843	H+ translocating pyrophosphatase	[C] Energy production and conversion
CC1396	CCNA_01640	3.43566	2.99271	Lactate 2-monooxygenase	[C] Energy production and conversion
CC1569	CCNA_01841	1.79318	2.13242	Quinone oxidoreductase	[C] Energy production and conversion
CC1764	CCNA_01843	7.52075	7.2137	Isocitrate lyase	[C] Energy production and conversion
CC1765	CCNA_01925	5.89789	6.22895	Malate synthase	[C] Energy production and conversion
CC1849	CCNA_03124	1.88769	2.33895	Coniferyl aldehyde dehydrogenase	[C] Energy production and conversion
CC3029	CCNA_03243	2.71526	2.51811	NAD/MYCOTHIOL-DEPENDENT FORMALDEHYDE DEHYDROGENASE	[C] Energy production and conversion
CC3141	CCNA_00555	2.17423	1.82571	Aldehyde dehydrogenase	[C] Energy production and conversion
CC0521	CCNA_00773	2.24963	3.02126	Nitrogen regulatory protein P-II	[E] Amino acid transport and metabolism
CC0736	CCNA_00994	1.98477	1.65571	Carboxypeptidase S	[E] Amino acid transport and metabolism
CC0945	CCNA_01463	3.21306	3.37305	Oxidoreductase, GMC family	[E] Amino acid transport and metabolism
CC1397	CCNA_01684	1.73088	2.14553	3-deoxy-7-phosphoheptulonate synthase	[E] Amino acid transport and metabolism
CC1612	CCNA_01706	2.38095	3.06423	Phenylalanine-4-hydroxylase	[E] Amino acid transport and metabolism
CC1634	CCNA_02244	2.46782	3.57969	dehydrogluconate dehydrogenase	[E] Amino acid transport and metabolism
CC2162	CCNA_03660	2.66635	2.90225	Aminotransferase class I family	[E] Amino acid transport and metabolism
CC3546	CCNA_03746	3.42657	5.58925	Usg protein	[E] Amino acid transport and metabolism
CC3631	CCNA_03816	1.65984	1.89418	Acetylornithine deacetylase	[E] Amino acid transport and metabolism
CC3702	CCNA_02702	1.73206	2.76632	Peptidyl-dipeptidase DCP	[E] Amino acid transport and metabolism
CC2619	CCNA_00817	1.62622	1.92994	Xanthine dehydrogenase small subunit	[F] Nucleotide transport and metabolism
CC0777	CCNA_01259	2.33189	2.67751	L-sorbosone dehydrogenase [FAD]	[G] Carbohydrate transport and metabolism
CC1201	CCNA_01822	3.30256	2.9071	Class II Aldolase and Adducin proteins	[G] Carbohydrate transport and metabolism
CC1748	CCNA_02212	2.64503	2.51503	Melibiose carrier protein	[G] Carbohydrate transport and metabolism
CC2128	CCNA_02220	2.74583	2.19316	ANTIBIOTIC-INDUCED PROTEIN, Drp35	[G] Carbohydrate transport and metabolism
CC2136	CCNA_02570	2.40743	2.28156	Beta-glucosidase	[G] Carbohydrate transport and metabolism
CC2485	CCNA_03245	3.83908	2.99271	Transporter	[G] Carbohydrate transport and metabolism
CC3143	CCNA_00077	2.41217	1.85101	Omega-amino acid--pyruvate aminotransferase	[H] Coenzyme transport and metabolism
CC0079	CCNA_00078	2.74125	1.81218	Acyl-CoA dehydrogenase, long-chain specific	[I] Lipid transport and metabolism
CC0080	CCNA_00192	3.02148	2.10522	Acyl-CoA dehydrogenase	[I] Lipid transport and metabolism
CC0192	CCNA_00358	2.11668	1.97411	Long-chain-fatty-acid--CoA ligase	[I] Lipid transport and metabolism
CC0353	CCNA_00403	2.36188	2.86977	Delta3,5-delta2,4-dienoyl-CoA isomerase precursor	[I] Lipid transport and metabolism
CC0398	CCNA_00436	2.80957	2.59212	Short chain dehydrogenase	[I] Lipid transport and metabolism
CC0427	CCNA_00726	2.16146	1.74821	Acyl-CoA dehydrogenase, short-chain specific	[I] Lipid transport and metabolism
CC0690	CCNA_00991	3.43372	2.76462	Acyl-CoA dehydrogenase	[I] Lipid transport and metabolism
CC0942	CCNA_00996	4.10591	3.66219	Nodulation protein N	[I] Lipid transport and metabolism
CC0947	CCNA_01017	3.40738	2.7141	Enoyl-CoA hydratase	[I] Lipid transport and metabolism
CC0966	CCNA_01368	3.23159	3.02082	AMP-(fatty)acid ligases	[I] Lipid transport and metabolism
CC1310	CCNA_01382	3.16939	2.70102	Acyl-CoA dehydrogenase	[I] Lipid transport and metabolism
CC1321	CCNA_01498	3.50179	3.33759	Long-chain-fatty-acid--CoA ligase	[I] Lipid transport and metabolism
CC1431	CCNA_01511	2.23953	2.41295	DNA-dependent DNA polymerase III alpha chain	[I] Lipid transport and metabolism
CC1444	CCNA_01927	2.08484	1.88769	Sterol desaturase family protein	[I] Lipid transport and metabolism
CC1851	CCNA_02045	1.72311	2.16569	Enoyl-CoA hydratase	[I] Lipid transport and metabolism
CC1967	CCNA_02128	2.51143	1.88733	Acetyl-coenzyme A synthetase	[I] Lipid transport and metabolism
CC2049	CCNA_02129	2.87951	2.14913	Acyl-CoA dehydrogenase	[I] Lipid transport and metabolism
CC2050	CCNA_02215	3.49853	2.84078	Acyl-CoA dehydrogenase, short-chain specific	[I] Lipid transport and metabolism
CC2131	CCNA_03172	2.6234	2.25039	Acyl-CoA dehydrogenase	[I] Lipid transport and metabolism
CC3076	CCNA_03293	2.63225	1.69543	3-oxoacyl-[acyl-carrier protein] reductase	[I] Lipid transport and metabolism
CC3189	CCNA_03456	3.7822	2.58637	Enoyl-CoA hydratase / Delta(3)-cis-delta(2)-trans-enoyl-CoA isomerase / 3-hydroxyacyl-CoA dehydrogenase / 3-hydroxybutyryl-CoA epimerase	[I] Lipid transport and metabolism
CC3346	CCNA_03553	3.55393	3.77501	Lipase	[I] Lipid transport and metabolism
CC3441	CCNA_03567	1.83179	1.98157	Bis(5'-nucleosyl)-tetraphosphatase (asymmetrical)	[I] Lipid transport and metabolism
CC3454	CCNA_03575	2.30655	1.72544	Acyl-CoA dehydrogenase	[I] Lipid transport and metabolism
CC3462	CCNA_01384	1.96607	1.59526	3-ketoacyl-CoA thiolase	[I] Lipid transport and metabolism
CC1323	CCNA_02886	3.22333	2.42344	Amidase family protein	[J] Translation
CC2796	CCNA_03711	2.72619	2.6632	Translation initiation inhibitor	[J] Translation
CC3597	CCNA_00079	1.98068	1.91833	Ribosome-associated factor Y	[J] Translation
CC0081	CCNA_00247	3.74409	2.83835	Transcriptional regulator, MerR family	[K] Transcription
CC0247	CCNA_01106	2.52052	2.74166	Two-component receiver protein	[K] Transcription
CC1054	CCNA_01721	1.98588	2.32216	antitoxin protein parD-2	[K] Transcription
CC1649	CCNA_02840	2.41081	2.76385	RNA polymerase sigma-E factor	[K] Transcription
CC2754	CCNA_02977	2.30942	2.72527	Transcriptional regulator	[K] Transcription
CC2883	CCNA_03267	1.64306	3.22166	RNA polymerase ECF-type sigma factor sigU	[K] Transcription
CC3164	CCNA_03694	2.34618	2.56902	Hypothetical transcriptional regulatory protein	[K] Transcription
CC3579	CCNA_00275	2.05131	2.20704	Transcriptional regulator	[K] Transcription
CC0273	CCNA_01874	1.8524	3.3601	Transposase	[L] Replication
CC1796	CCNA_02036	1.922	2.66393	Transposase	[L] Replication
CC1959	CCNA_02739	2.46277	2.57891	DNA-binding protein HU	[L] Replication
CC2656	CCNA_02762	1.87557	1.60658	Transposase	[L] Replication
CC2680	CCNA_00834	1.95014	2.22245	DNA repair protein radC	[L] Replication
CC0792	CCNA_00835	2.07752	3.67777	Flagellin	[N] Cell motility
CC0793	CCNA_01528	1.62963	4.70997	Flagellin	[N] Cell motility
CC1461	CCNA_02111	3.12827	2.70243	Flagellin	[N] Cell motility
CC2031	CCNA_01643	2.66081	3.22446	PilF-related tetratricopeptide repeat protein	[N] Cell motility
CC1572	CCNA_03485	2.41264	2.06703	Arginine-tRNA-protein transferase	[O] Posttranslational modification
CC3375	CCNA_00224	2.12126	2.44678	Membrane protease family, stomatin/prohibitin homologs	[O] Posttranslational modification
CC0224	CCNA_00338	2.32902	3.2779	Conserved hypothetical protein (putative porin)	[P] Inorganic ion transport and metabolism
CC0335	CCNA_00813	2.80618	2.45382	TonB-dependent receptor	[P] Inorganic ion transport and metabolism
CC0774	CCNA_01042	1.97921	1.95896	Dimethylaniline monooxygenase [N-oxide forming]	[P] Inorganic ion transport and metabolism
CC0991	CCNA_01410	2.96918	2.32425	TonB-dependent receptor	[P] Inorganic ion transport and metabolism
CC1348	CCNA_02652	2.13861	2.19713	Cyclohexanone monooxygenase	[P] Inorganic ion transport and metabolism
CC2569	CCNA_02716	2.24334	2.08094	Cyclohexanone monooxygenase	[P] Inorganic ion transport and metabolism
CC2633	CCNA_03263	1.80766	2.00086	ABC transporter substrate-binding protein	[P] Inorganic ion transport and metabolism
CC3161	CCNA_03371	3.749	3.75861	TonB-dependent receptor	[P] Inorganic ion transport and metabolism
CC3262	CCNA_03444	1.71716	3.18834	Bacterioferritin	[P] Inorganic ion transport and metabolism
CC3336	CCNA_00037	2.89918	2.7576	TonB-dependent receptor	[P] Inorganic ion transport and metabolism
CC0038	CCNA_02614	2.46881	2.1644	Esterase Lipase Family Protein	[Q] Secondary metabolites biosynthesis
CC2531	CCNA_02754	2.72238	2.59894	Fumarylacetoacetase	[Q] Secondary metabolites biosynthesis
CC2672	CCNA_02885	2.57963	2.48307	Parathion hydrolase	[Q] Secondary metabolites biosynthesis
CC2795	CCNA_03573	3.1569	2.79797	Isochorismatase family protein	[Q] Secondary metabolites biosynthesis
CC3460	CCNA_00301	2.32056	2.25966	D-aminoacylase	[Q] Secondary metabolites biosynthesis
CC0299	CCNA_01078	3.03649	2.36069	Phosphotransferase family protein	[R] General function prediction only
CC1026	CCNA_01285	3.67445	4.0396	Methyltransferase	[R] General function prediction only
CC1227	CCNA_01287	1.63194	1.87506	Proline iminopeptidase	[R] General function prediction only
CC1229	CCNA_01365	2.12068	2.33201	Epoxide hydrolase	[R] General function prediction only
CC1307	CCNA_01396	2.75428	1.82029	Aspartyl protease perP	[R] General function prediction only
CC1335	CCNA_01641	1.79721	2.19484	Tetratricopeptide repeat family protein	[R] General function prediction only
CC1570	CCNA_02095	1.96653	1.63463	2-Nitropropane dioxygenase family protein	[R] General function prediction only
CC2016	CCNA_02660	2.25729	2.24211	Putative NADP-dependent oxidoreductase	[R] General function prediction only
CC2577	CCNA_03061	2.38194	2.58007	Pyridoxamine 5'-phosphate oxidase family protein	[R] General function prediction only
CC2966	CCNA_03085	2.00214	2.05145	3-oxoacyl-[acyl-carrier protein] reductase	[R] General function prediction only
CC2990	CCNA_03396	2.63101	2.04347	Nitropropane dioxygenase / Trans-enoyl-CoA reductase family	[R] General function prediction only
CC3287	CCNA_00166	3.28172	3.63827	Trypsin-like serine proteases, typically periplasmic, contain C-terminal PDZ domain	[R] General function prediction only
CC0167	CCNA_00416	3.95743	2.79068	Hypothetical protein	[S] Function unknown
CC0411	CCNA_00417	2.51139	2.77381	Hypothetical protein	[S] Function unknown
CC0412	CCNA_01361	3.99843	4.19555	Hypothetical protein	[S] Function unknown
CC1303	CCNA_01968	2.01015	2.9998	Hypothetical protein	[S] Function unknown
CC1891	CCNA_02155	2.38073	3.59877	Hypothetical protein with pentapeptide repeats	[S] Function unknown
CC2074	CCNA_02196	2.09096	1.61505	Hypothetical protein	[S] Function unknown
CC2111		3.20081	3.88549	Hypothetical membrane spanning protein	[S] Function unknown
CC2122	CCNA_02216	1.61837	1.64241		[S] Function unknown
CC2132	CCNA_02496	3.77937	3.13778	ABM family monooxygenase	[S] Function unknown
CC2414	CCNA_02552	2.51277	1.7595	Hypothetical protein	[S] Function unknown
CC2467	CCNA_02603	2.70453	4.04998	ATP-dependent Clp protease adaptor protein ClpS	[S] Function unknown
CC2518	CCNA_02866	2.10075	1.91262	Phosphatidylserine decarboxylase	[S] Function unknown
CC2778	CCNA_03400	1.58573	1.8788	Conserved membrane protein	[S] Function unknown
CC3291	CCNA_03403	3.56132	3.79685	Hypothetical protein	[S] Function unknown
CC3294	CCNA_03568	3.10693	2.88083	Hypothetical protein	[S] Function unknown
CC3455	CCNA_03775	3.14244	3.35712	LemA protein	[S] Function unknown
CC3660	CCNA_00248	2.284	2.2395	Conserved hypothetical protein	[S] Function unknown
CC0248	CCNA_02659	1.77405	2.56776	Sensor histidine protein kinase	[T] Signal transduction mechanisms
CC2576	CCNA_02709	3.50942	3.12456	two-component receiver domain protein	[T] Signal transduction mechanisms
CC2626	CCNA_02715	4.33233	4.07154	CBS domain containing protein	[T] Signal transduction mechanisms
CC2632	CCNA_02727	1.6922	1.86741	MASE1-family sensor histidine kinase	[T] Signal transduction mechanisms
CC2644	CCNA_02967	2.87152	5.23202	PhoH protein	[T] Signal transduction mechanisms
CC2874	CCNA_01639	2.06181	2.40695	PAS-family sensor histidine kinase	[T] Signal transduction mechanisms
CC1568	CCNA_03603	2.52915	2.10772	Beta-lactamase family protein	[V] Defense mechanisms
CC3489	CCNA_00076	2.81499	2.71999	Beta-lactamase family protein	[V] Defense mechanisms
CC0078	CCNA_00584	2.25102	2.20864	Hypothetical protein	Not classified
CC0550	CCNA_00605	3.24892	3.10326	Hypothetical protein	Not classified
CC0570	CCNA_00661	1.58818	1.69909	Conserved hypothetical membrane protein	Not classified
CC0625	CCNA_00662	3.20543	2.79458	Transposase	Not classified
CC0626	CCNA_00734	3.03863	3.75534	Hypothetical protein	Not classified
CC0698	CCNA_00842	2.64256	3.34762	GumN superfamily protein	Not classified
CC0800	CCNA_00948	2.06492	2.63236	Hypothetical protein	Not classified
CC0903	CCNA_01023	2.58768	2.1863	Hypothetical protein	Not classified
CC0972	CCNA_01121	1.98047	1.73418	Tryptophan halogenase	Not classified
CC1068	CCNA_01186	1.7501	1.7358	Conserved hypothetical protein	Not classified
CC1128	CCNA_01303	1.77732	2.46832	Conserved hypothetical protein	Not classified
CC1245	CCNA_01519	1.60605	2.07724	Conserved hypothetical protein	Not classified
CC1452	CCNA_01521	1.99472	3.39571	Universal stress protein family	Not classified
CC1454	CCNA_01536	1.7684	2.14896	Hypothetical exported protein	Not classified
CC1469	CCNA_01551	2.67033	3.01795	Hypothetical protein	Not classified
CC1484	CCNA_01705	1.94105	2.05894	hypothetical protein	Not classified
CC1633	CCNA_01779	2.03374	2.23504	Conserved hypothetical protein (1080)	Not classified
CC1707	CCNA_01852	3.48057	2.14727	Hypothetical protein	Not classified
CC1774	CCNA_02217	3.54604	3.17761	Major facilitator superfamily transporter	Not classified
CC2133	CCNA_02350	2.0452	1.99635	hypothetical protein	Not classified
CC2267	CCNA_02407	1.7514	2.21859	Dabb-family alpha/beta stress response protein	Not classified
CC2322	CCNA_02728	1.62405	2.32428	Hypothetical protein	Not classified
CC2645		1.5882	2.41292	hypothetical protein	Not classified
CC2728	CCNA_02973	3.13026	2.8554		Not classified
CC2879	CCNA_03313	1.65486	1.70874	antitoxin protein relB-3	Not classified
CC3207	CCNA_03348	4.55407	5.2653	Hypothetical protein	Not classified
CC3240	CCNA_03374	2.83874	3.10337	Hypothetical protein	Not classified
CC3265	CCNA_03411	3.14851	2.95021	Hypothetical protein	Not classified
CC3302		1.99867	2.37733	Hypothetical protein	Not classified
CC3335	CCNA_03532	2.83339	2.68819		Not classified
CC3419	CCNA_03572	1.75685	2.33891	Transporter	Not classified
CC3459		1.72401	1.7823	Hypothetical cytosolic protein	Not classified
CC3479	CCNA_03605	1.62925	2.16498		Not classified
CC3491		3.21786	1.7775	Hypothetical protein	Not classified

## Sheet: 4 SW-no-change-and-ST-up
Cluster 4 - SW no change, ST up
Gene ID CB15	Gene ID NA1000	log-2 ratio SW starved/no starved	log-2 ratio ST starved/no starved	Annotation	COG category
CC_0763	CCNA_01468	-0.0315389	2.86934	Cytochrome bd-type quinol oxidase, subunit 2 cydB	[C] Energy production and conversion
CC_1402	CCNA_01470	-0.229553	2.71909	Cytochrome cbb3 oxidase, cytochrome c subunit ccoO	[C] Energy production and conversion
CC_1404	CCNA_02357	-0.738365	2.61237	Cytochrome cbb3 oxidase, diheme subunit, membrane-bound ccoP	[C] Energy production and conversion
CC_2274	CCNA_03097	0.369578	2.12554	Malonate-semialdehyde dehydrogenase (acetylating) / Methylmalonate-semialdehyde dehydrogenase (acylating)	[C] Energy production and conversion
CC_3002	CCNA_03407	-0.87515	2.53383	Aldo/keto reductase family protein	[C] Energy production and conversion
CC_3298	CCNA_03502	0.496277	1.95184	Sodium export permease protein	[C] Energy production and conversion
CC_3391	CCNA_02246	0.651689	1.92402	YceI/cytochrome b561 periplasmic protein	[C] Energy production and conversion
CC_2165	CCNA_00157	0.923934	2.84848	division plane positioning ATPase mipZ	[D] Cell cycle control
CC_0158	CCNA_01677	0.483647	1.59834	Glyoxalase family protein	[E] Amino acid transport and metabolism
CC_1605	CCNA_01678	0.525719	1.91641	Carboxypeptidase G2 precursor	[E] Amino acid transport and metabolism
CC_1606	CCNA_01836	0.695135	2.09562	Arginine N-succinyltransferase, beta chain	[E] Amino acid transport and metabolism
CC_1760	CCNA_02112	0.292823	1.76482	Acyl-CoA thioesterase I / Lysophospholipase (3.1.1.5)	[E] Amino acid transport and metabolism
CC_2032	CCNA_02444	0.752718	1.8184	D-cysteine desulfhydrase	[E] Amino acid transport and metabolism
CC_2359	CCNA_00261	0.961184	1.88036	N(4)-(beta-N-acetylglucosaminyl)-L-asparaginase	[E] Amino acid transport and metabolism
CC_0260	CCNA_01204	-0.119863	2.07018	Ribonucleoside-diphosphate reductase beta chain	[F] Nucleotide transport and metabolism
CC_1146	CCNA_01701	0.783253	1.73656	dTDP-glucose 4,6-dehydratase	[G] Carbohydrate transport and metabolism
CC_1629	CCNA_03734	0.68732	1.85964	Xylose isomerase family protein	[G] Carbohydrate transport and metabolism
CC_3619	CCNA_01713	0.944823	1.8322	Glutamine-dependent NAD(+) synthetase	[H] Coenzyme transport and metabolism
CC_1641	CCNA_00822	-0.222517	1.60531	2'-5' RNA ligase	[J] Translation
CC_0782	CCNA_00967	0.323821	1.85472	Hypothetical protein	[K] Transcription
CC_0919	CCNA_01195	0.855462	1.74814	Transcriptional regulator, TetR family	[K] Transcription
CC_1137	CCNA_01362	0.316132	1.61184	Transcriptional regulator, LacI family	[K] Transcription
CC_1304	CCNA_02334	0.457103	1.64732	Alkaline phosphatase synthesis two-component response regulator phoP	[K] Transcription
CC_2251	CCNA_02397	0.469562	2.29825	Transcriptional regulator of stalk biogenesis staR	[K] Transcription
CC_2312	CCNA_02790	0.904588	1.60394	Transcriptional regulator, DeoR family	[K] Transcription
CC_2707	CCNA_03195	0.88314	1.78231	RNA polymerase ECF-type sigma factor	[K] Transcription
CC_3098	CCNA_00744	0.613618	1.88486	RNA polymerase sigma-32 factor	[K] Transcription
CC_0707	CCNA_01083	0.837821	1.99961	Hypothetical cytosolic protein	[L] Replication
CC_1031	CCNA_03337	0.639424	1.84002	Hypothetical protein	[L] Replication
CC_3229	CCNA_01045	0.685721	2.03606	Peptidoglycan-associated lipoprotein pal	[M] Cell wall/membrane/envelope biogenesis
CC_0994	CCNA_01091	0.772211	1.70731	Conserved hypothetical cytosolic protein	[O] Posttranslational modification
CC_1039	CCNA_01467	-0.0607675	1.95941	Peptide methionine sulfoxide reductase	[O] Posttranslational modification
CC_1401	CCNA_02037	0.10976	3.88227	Cytochrome cbb3 oxidase subunit I ccoN	[O] Posttranslational modification
CC_1960	CCNA_02341	0.724076	1.87001	ATP-dependent endopeptidase Lon	[O] Posttranslational modification
CC_2258	CCNA_02516	-0.859641	2.38819	Small heat shock protein	[O] Posttranslational modification
CC_2434	CCNA_02936	0.644464	1.82202	Glutathione S-transferase	[O] Posttranslational modification
CC_2843	CCNA_02370	0.880145	1.66779	Glutathione S-transferase	[O] Posttranslational modification
CC_2287	CCNA_02579	0.499792	2.25042	TonB-dependent maltose outer membrane transporter malA	[P] Inorganic ion transport and metabolism
CC_2494	CCNA_00345	0.584702	2.13166	Cytochrome P450-terp	[Q] Secondary metabolites biosynthesis
CC_0341	CCNA_01911	0.80832	1.60868	IroE protein	[R] General function prediction only
CC_1834	CCNA_02255	0.695456	2.37873	Glyoxalase family protein	[R] General function prediction only
CC_2173	CCNA_02632	0.741779	1.70393	lysozyme-family localization factor spmX	[R] General function prediction only
CC_2549	CCNA_02662	0.873696	2.35743	Putative heme-binding protein	[R] General function prediction only
CC_2579	CCNA_03408	0.614234	1.62145	Aminopeptidase	[R] General function prediction only
CC_3299	CCNA_03618	0.461715	1.77564	ABC transporter ATP-binding protein	[R] General function prediction only
CC_3503	CCNA_03778	-0.07642	1.64539	SCO1/SenC family protein	[R] General function prediction only
CC_3663	CCNA_02312	0.679035	2.28095	Integral membrane protein	[R] General function prediction only
CC_2229	CCNA_02462	0.174289	2.07189	SLA2 protein	[S] Function unknown
CC_2377	CCNA_03520	0.885959	1.95466	Hypothetical protein	[S] Function unknown
CC_3409	CCNA_01116	0.841213	1.85062	Hypothetical protein	[S] Function unknown
CC_1063	CCNA_01352	0.507933	1.70113	Histidine protein kinase divJ	[T] Signal transduction mechanisms
CC_1294	CCNA_02587	0.117108	2.13745	Two component sensor histidine kinase	[T] Signal transduction mechanisms
CC_2501	CCNA_02172	0.508639	2.10837	PAS-family sensor histidine kinase	[T] Signal transduction mechanisms
CC_2090	CCNA_02174	0.995449	1.97962	Transporter	[V] Defense mechanisms
CC_2092	CCNA_00111	0.657727	1.69654	Multidrug resistance efflux pump	[V] Defense mechanisms
CC_0112	CCNA_00282	0.808772	1.96276	Conserved hypothetical protein	Not classified
CC_0280	CCNA_00709	0.631041	2.38156	Conserved cell surface protein	Not classified
CC_0673	CCNA_01093	0.46507	1.67484	Hypothetical protein	Not classified
CC_1041	CCNA_01128	0.811865	2.13345	Hypothetical protein	Not classified
CC_1074	CCNA_02163	0.51189	1.88652	Hypothetical protein	Not classified
CC_2081	CCNA_02433	0.482553	1.59417	hypothetical protein	Not classified
CC_2348	CCNA_02693	0.57056	2.51001	hypothetical protein	Not classified
CC_2610	CCNA_03297	-0.268966	2.36795	Iron-regulated protein frpC	Not classified
CC_3193	CCNA_03439	0.44108	1.76451	Conserved hypothetical protein	Not classified
CC_3330	CCNA_03449	0.952864	2.27889	Hypothetical protein	Not classified
CC_3341	CCNA_03487	0.799956	1.65161	Methyltransferase	Not classified
CC_3377	CCNA_03606	0.914968	2.31323	Hypothetical protein	Not classified
CC_3492	CCNA_03629	0.518886	1.62973	Hypothetical protein	Not classified
CC_3514	CCNA_03674	0.358759	1.77289	Hypothetical protein	Not classified
CC_3559	CCNA_03785	0.787972	1.66881	Hypothetical protein	Not classified
CC_3671		0.95648	1.82092	Hypothetical protein	Not classified

## Sheet: 5 SW-down-and-ST-no-change
Cluster 5 - SW down, ST no change
Gene ID CB15	Gene ID NA1000	log-2 ratio SW starved/no starved	log-2 ratio ST starved/no starved	Annotation	COG category
CC_1449	CCNA_01516	-1.92997	-0.706071	NAD(P)H-dependent quinone reductase	[C] Energy production and conversion
CC_1942	CCNA_02020	-1.73174	-0.812466	NADH-quinone oxidoreductase chain I	[C] Energy production and conversion
CC_3759	CCNA_03875	-1.63817	-0.84561	Quinone oxidoreductase	[C] Energy production and conversion
CC_1543	CCNA_01612	-2.08279	-0.131859	Rod shape-determining protein mreB	[D] Cell cycle control
CC_1426	CCNA_01493	-1.84954	-0.978903	Cysteine synthase	[E] Amino acid transport and metabolism
CC_1744	CCNA_01818	-1.70963	-0.964804	D-alanine aminotransferase	[E] Amino acid transport and metabolism
CC_1865	CCNA_01941	-1.68623	-0.877794	Cysteine desulfhydrase / Selenocysteine lyase	[E] Amino acid transport and metabolism
CC_1899	CCNA_01976	-1.8458	-0.970521	Indole-3-glycerol phosphate synthase	[E] Amino acid transport and metabolism
CC_2346	CCNA_02431	-1.89183	-0.973049	Histidinol dehydrogenase	[E] Amino acid transport and metabolism
CC_1658	CCNA_01730	-1.8919	-0.716881	Amidophosphoribosyltransferase	[F] Nucleotide transport and metabolism
CC_1720	CCNA_01791	-2.33296	-0.0309084	CTP synthase	[F] Nucleotide transport and metabolism
CC_0887	CCNA_00931	-2.48145	-0.172363	GTP cyclohydrolase II / 3,4-dihydroxy-2-butanone-4-phosphate synthase	[H] Coenzyme transport and metabolism
CC_0888	CCNA_00932	-2.08374	-0.315841	6,7-dimethyl-8-ribityllumazine synthase	[H] Coenzyme transport and metabolism
CC_0006	CCNA_00006	-1.81663	-0.461593	Enoyl-CoA hydratase	[I] Lipid transport and metabolism
CC_1260	CCNA_01318	-1.75891	-0.774839	LSU ribosomal protein L5P	[J] Translation
CC_1356	CCNA_01418	-1.86524	-0.995747	Transcriptional regulator	[K] Transcription
CC_2766	CCNA_02854	-1.75803	-0.91815	Two-component response regulator	[K] Transcription
CC_0747	CCNA_00784	-2.38605	-0.830732	Heat resistant agglutinin	[M] Cell wall/membrane/envelope biogenesis
CC_1141	CCNA_01199	-1.66118	-0.409648	Glucose-1-phosphate thymidylyltransferase	[M] Cell wall/membrane/envelope biogenesis
CC_1544	CCNA_01613	-2.295	-0.443492	Rod shape-determining protein mreC	[M] Cell wall/membrane/envelope biogenesis
CC_2383	CCNA_02466	-1.59339	-0.453894	UDP-glucose 4-epimerase	[M] Cell wall/membrane/envelope biogenesis
CC_3611	CCNA_03726	-2.43798	-0.823551	Transcriptional regulator	[M] Cell wall/membrane/envelope biogenesis
CC_0010	CCNA_00010	-1.7615	-0.933383	Chaperone protein dnaK	[O] Posttranslational modification
CC_0375	CCNA_00379	-1.65325	-0.926444	Thiol:disulfide interchange protein dsbA	[O] Posttranslational modification
CC_1316	CCNA_01376	-1.76146	0.0318272	Glutathione S-transferase	[O] Posttranslational modification
CC_2660	CCNA_02743	-2.91265	-0.827659	TonB dependent receptor	[P] Inorganic ion transport and metabolism
CC_2873	CCNA_02966	-1.72176	-0.0778785	Non-specific DNA-binding protein Dps / Iron-binding ferritin-like antioxidant protein / Ferroxidase	[P] Inorganic ion transport and metabolism
CC_3693	CCNA_03807	-1.92953	-0.793224	Organic solvent resistance transport system Ttg2D protein	[Q] Secondary metabolites biosynthesis
CC_3758	CCNA_03874	-2.12036	-0.846839	Carboxymethylenebutenolidase	[Q] Secondary metabolites biosynthesis
CC_0465	CCNA_00497	-1.8263	-0.312395	Putative rhamnosyl transferase	[R] General function prediction only
CC_1859	CCNA_01935	-1.74666	-0.27369	Hypothetical cytosolic protein	[R] General function prediction only
CC_3509	CCNA_03624	-3.22673	-0.810612	Sodium bicarbonate cotransporter	[R] General function prediction only
CC_3385	CCNA_03496	-1.87319	-0.390128	Hypothetical cytosolic protein	[S] Function unknown
CC_2580	CCNA_02663	-2.30842	-0.970526	DnaK suppressor protein dksA	[T] Signal transduction mechanisms
CC_2001	CCNA_02080	-1.8677	-0.986945	Sec-independent protein translocase protein tatC	[U] Intracellular trafficking
CC_2007	CCNA_02086	-1.71053	-0.95752	FtsN-like cell division protein	Not classified
CC_2557		-1.58538	-0.645201	phospho-N-acetylmuramoyl-pentapeptide-transferase, authentic frameshift	Not classified

## Sheet: 6 SW-down-and-ST-down
Cluster 6 - SW down, ST down
Gene ID CB15	Gene ID NA1000	log-2 ratio SW starved/no starved	log-2 ratio ST starved/no starved	Annotation	COG category
CC0047	CCNA_00193	-2.97145	-3.20506	Inorganic pyrophosphatase	[C] Energy production and conversion
CC0193	CCNA_00340	-2.82	-3.26408	3-isopropylmalate dehydrogenase	[C] Energy production and conversion
CC0337	CCNA_00341	-2.25298	-2.50656	Succinyl-CoA synthetase beta chain	[C] Energy production and conversion
CC0338	CCNA_00346	-2.42162	-2.55042	Succinyl-CoA synthetase alpha chain	[C] Energy production and conversion
CC0342	CCNA_00370	-2.54893	-2.20783	Dihydrolipoamide dehydrogenase	[C] Energy production and conversion
CC0365	CCNA_00371	-3.11616	-3.64005	ATP synthase B chain	[C] Energy production and conversion
CC0366	CCNA_00373	-3.32707	-3.7326	ATP synthase B' chain	[C] Energy production and conversion
CC0368	CCNA_00505	-5.12012	-4.72317	ATP synthase A chain	[C] Energy production and conversion
CC0472	CCNA_00691	-1.91574	-1.60736	Ubiquinol-cytochrome c reductase iron-sulfur subunit	[C] Energy production and conversion
CC0654	CCNA_01560	-3.7534	-3.31429	Ferredoxin	[C] Energy production and conversion
CC1493	CCNA_01799	-2.43691	-2.12583	Phosphoenolpyruvate carboxylase	[C] Energy production and conversion
CC1726	CCNA_01800	-4.83733	-4.45602	Pyruvate dehydrogenase E1 component alpha subunit	[C] Energy production and conversion
CC1727	CCNA_01803	-4.14499	-3.53919	Pyruvate dehydrogenase E1 component beta subunit	[C] Energy production and conversion
CC1729	CCNA_01805	-2.76905	-2.73402	Dihydrolipoamide acetyltransferase component of pyruvate dehydrogenase complex	[C] Energy production and conversion
CC1731	CCNA_01964	-2.33432	-1.64613	Dihydrolipoamide dehydrogenase	[C] Energy production and conversion
CC1887	CCNA_01983	-2.35016	-2.36372	NADH dehydrogenase	[C] Energy production and conversion
CC1906	CCNA_02017	-2.45734	-1.62948	Citrate synthase	[C] Energy production and conversion
CC1939	CCNA_02023	-2.22317	-1.82951	NADH-quinone oxidoreductase chain L	[C] Energy production and conversion
CC1946	CCNA_02024	-3.13024	-2.59258	NADH-quinone oxidoreductase chain G	[C] Energy production and conversion
CC1947	CCNA_02027	-3.53919	-2.92663	NADH-quinone oxidoreductase chain F	[C] Energy production and conversion
CC1950	CCNA_02029	-2.39517	-2.18456	NADH-quinone oxidoreductase chain E	[C] Energy production and conversion
CC1952	CCNA_02031	-2.11846	-1.79162	NADH-quinone oxidoreductase chain D	[C] Energy production and conversion
CC1954	CCNA_02032	-2.2264	-2.01193	NADH-quinone oxidoreductase chain C	[C] Energy production and conversion
CC1955	CCNA_02293	-2.25058	-1.88006	NADH-quinone oxidoreductase chain B	[C] Energy production and conversion
CC2210	CCNA_02607	-2.06702	-1.79111	Thiol:disulfide interchange protein tlpA	[C] Energy production and conversion
CC2522	CCNA_03030	-3.77008	-3.28211	Isocitrate dehydrogenase [NADP]	[C] Energy production and conversion
CC2935	CCNA_03314	-2.23788	-1.84387	Cytochrome c	[C] Energy production and conversion
CC3208	CCNA_03517	-2.49567	-2.63146	Ferredoxin--NADP reductase	[C] Energy production and conversion
CC3406	CCNA_03560	-1.69109	-1.65057	Cytochrome c oxidase polypeptide I coxA	[C] Energy production and conversion
CC3447	CCNA_03561	-3.07026	-3.32202	ATP synthase beta chain	[C] Energy production and conversion
CC3448	CCNA_03562	-5.02436	-4.88033	ATP synthase gamma chain	[C] Energy production and conversion
CC3449	CCNA_03563	-4.28132	-4.25101	ATP synthase alpha chain	[C] Energy production and conversion
CC3450	CCNA_03641	-3.42775	-3.31047	ATP synthase delta chain	[C] Energy production and conversion
CC3526	CCNA_03642	-2.5028	-2.39518	Succinate dehydrogenase iron-sulfur protein	[C] Energy production and conversion
CC3527	CCNA_03643	-2.68585	-2.62334	Succinate dehydrogenase flavoprotein subunit	[C] Energy production and conversion
CC3528	CCNA_03644	-2.43476	-2.34403	Succinate dehydrogenase membrane anchor subunit	[C] Energy production and conversion
CC3529	CCNA_03770	-3.02922	-2.25859	Succinate dehydrogenase cytochrome B-556 subunit	[C] Energy production and conversion
CC3655	CCNA_03781	-1.75601	-1.59608	Malate dehydrogenase	[C] Energy production and conversion
CC3667	CCNA_00163	-2.91908	-2.89247	Aconitate hydratase	[C] Energy production and conversion
CC0164	CCNA_00128	-2.291	-2.5171	Chain length regulator (capsular polysaccharide biosynthesis) / Tyrosine-protein kinase (capsular polysaccharide biosynthesis)	[D] Cell cycle control
CC0129	CCNA_00195	-3.84069	-3.3984	Argininosuccinate synthase	[E] Amino acid transport and metabolism
CC0195	CCNA_00196	-2.5625	-2.7939	3-isopropylmalate dehydratase small subunit	[E] Amino acid transport and metabolism
CC0196	CCNA_00211	-3.48469	-4.20617	3-isopropylmalate dehydratase large subunit	[E] Amino acid transport and metabolism
CC0211	CCNA_00253	-3.39141	-3.80276	Agmatine deiminase	[E] Amino acid transport and metabolism
CC0253	CCNA_00283	-3.19183	-2.75457	Aspartate-semialdehyde dehydrogenase	[E] Amino acid transport and metabolism
CC0281	CCNA_00285	-1.84359	-1.8391	2,3,4,5-tetrahydropyridine-2-carboxylate N-succinyltransferase	[E] Amino acid transport and metabolism
CC0283	CCNA_00365	-4.26832	-3.35599	Acetylglutamate kinase	[E] Amino acid transport and metabolism
CC0360	CCNA_00515	-2.93822	-1.75844	Ornithine decarboxylase	[E] Amino acid transport and metabolism
CC0482	CCNA_00520	-3.87062	-3.79162	5-methyltetrahydropteroyltriglutamate--homocysteine methyltransferase	[E] Amino acid transport and metabolism
CC0487	CCNA_00886	-3.52894	-2.76859	Ribose-phosphate pyrophosphokinase	[E] Amino acid transport and metabolism
CC0843	CCNA_01179	-3.71043	-4.51052	Aspartokinase	[E] Amino acid transport and metabolism
CC1121	CCNA_01242	-3.97679	-3.07104	Phosphoadenosine phosphosulfate reductase	[E] Amino acid transport and metabolism
CC1184	CCNA_01253	-1.9556	-1.74152	Amino acid permease	[E] Amino acid transport and metabolism
CC1195	CCNA_01400	-2.58069	-2.43549	Dihydrodipicolinate synthase	[E] Amino acid transport and metabolism
CC1339	CCNA_01419	-3.15409	-1.95577	Nitrogen regulatory protein GlnK	[E] Amino acid transport and metabolism
CC1357	CCNA_01550	-2.02778	-2.01348	Serine hydroxymethyltransferase	[E] Amino acid transport and metabolism
CC1483	CCNA_01603	-3.3038	-2.15979	Sulfate adenylyltransferase subunit 2	[E] Amino acid transport and metabolism
CC1534	CCNA_01936	-2.14737	-2.1894	Aspartate aminotransferase	[E] Amino acid transport and metabolism
CC1860	CCNA_01975	-2.95731	-2.23249	Cysteine desulfurase / Selenocysteine lyase	[E] Amino acid transport and metabolism
CC1898	CCNA_02046	-1.9981	-1.59193	Anthranilate phosphoribosyltransferase	[E] Amino acid transport and metabolism
CC1968	CCNA_02047	-4.18042	-2.55532	Nitrogen regulatory protein P-II	[E] Amino acid transport and metabolism
CC1969	CCNA_02134	-4.11045	-2.4313	Glutamine synthetase	[E] Amino acid transport and metabolism
CC2055	CCNA_02222	-2.30837	-1.96572	Phosphogluconate dehydratase	[E] Amino acid transport and metabolism
CC2138	CCNA_02224	-3.79146	-3.32159	5-methyltetrahydrofolate--homocysteine methyltransferase homocysteine-binding subunit	[E] Amino acid transport and metabolism
CC2140	CCNA_02237	-2.97794	-3.40933	Methylenetetrahydrofolate reductase	[E] Amino acid transport and metabolism
CC2154	CCNA_02294	-3.06248	-2.77074	Xaa-Pro dipeptidyl-peptidase	[E] Amino acid transport and metabolism
CC2211	CCNA_02306	-2.94776	-2.3582	Argininosuccinate lyase	[E] Amino acid transport and metabolism
CC2223	CCNA_02321	-2.72068	-2.70351	Histidinol-phosphate aminotransferase	[E] Amino acid transport and metabolism
CC2238	CCNA_02326	-3.31025	-2.47838	O-succinylhomoserine sulfhydrylase	[E] Amino acid transport and metabolism
CC2243	CCNA_02385	-2.68619	-2.75295	Acetylornithine aminotransferase / Succinyldiaminopimelate aminotransferase	[E] Amino acid transport and metabolism
CC2300	CCNA_02994	-2.61038	-3.86256	3-deoxy-7-phosphoheptulonate synthase	[E] Amino acid transport and metabolism
CC2900	CCNA_03024	-2.61024	-2.97159	Carbamoyl-phosphate synthase large chain	[E] Amino acid transport and metabolism
CC2929	CCNA_03028	-3.81508	-3.55268	Branched-chain amino acid aminotransferase	[E] Amino acid transport and metabolism
CC2933	CCNA_03139	-1.63415	-1.67939	Prephenate dehydratase	[E] Amino acid transport and metabolism
CC3044	CCNA_03322	-2.42621	-3.18862	Dihydroxy-acid dehydratase	[E] Amino acid transport and metabolism
CC3215	CCNA_03323	-2.05923	-3.05144	D-3-phosphoglycerate dehydrogenase	[E] Amino acid transport and metabolism
CC3216	CCNA_03463	-2.83284	-2.93303	Phosphoserine aminotransferase	[E] Amino acid transport and metabolism
CC3353	CCNA_03524	-2.2928	-1.60957	Glycine dehydrogenase [decarboxylating]	[E] Amino acid transport and metabolism
CC3413	CCNA_03626	-2.34071	-2.29476	Di-/tripeptide transporter	[E] Amino acid transport and metabolism
CC3511	CCNA_03657	-1.87211	-2.33826	ATP phosphoribosyltransferase	[E] Amino acid transport and metabolism
CC3543	CCNA_03658	-2.27021	-2.82979	Tryptophan synthase alpha chain	[E] Amino acid transport and metabolism
CC3544	CCNA_03704	-2.01295	-2.64267	Tryptophan synthase beta chain	[E] Amino acid transport and metabolism
CC3589	CCNA_03721	-1.74611	-1.62415	3-phosphoshikimate 1-carboxyvinyltransferase	[E] Amino acid transport and metabolism
CC3606	CCNA_03722	-1.87021	-2.45689	Glutamate synthase [NADPH] small chain	[E] Amino acid transport and metabolism
CC3607	CCNA_03740	-2.90134	-3.4106	Glutamate synthase [NADPH] large chain	[E] Amino acid transport and metabolism
CC3625	CCNA_03850	-2.48452	-1.94783	Cysteine synthase	[E] Amino acid transport and metabolism
CC3734	CCNA_00084	-3.24807	-3.27737	Imidazoleglycerol-phosphate dehydratase	[E] Amino acid transport and metabolism
CC0086	CCNA_00104	-2.25077	-2.40942	Phosphoribosylaminoimidazolecarboxamide formyltransferase / IMP cyclohydrolase	[F] Nucleotide transport and metabolism
CC0105	CCNA_00299	-2.10318	-1.74268	Orotidine 5'-phosphate decarboxylase	[F] Nucleotide transport and metabolism
CC0297	CCNA_01327	-2.63519	-2.75557	Phosphoribosylamine--glycine ligase	[F] Nucleotide transport and metabolism
CC1269	CCNA_01624	-1.73227	-1.82508	Adenylate kinase / Nucleoside-diphosphate kinase	[F] Nucleotide transport and metabolism
CC1555	CCNA_01689	-1.61118	-2.03515	Orotate phosphoribosyltransferase	[F] Nucleotide transport and metabolism
CC1617	CCNA_01692	-2.70122	-2.78849	Inosine-5'-monophosphate dehydrogenase	[F] Nucleotide transport and metabolism
CC1620	CCNA_01770	-2.70794	-2.94965	GMP synthase [glutamine-hydrolyzing]	[F] Nucleotide transport and metabolism
CC1699	CCNA_01998	-3.70933	-3.26596	Nucleoside diphosphate kinase	[F] Nucleotide transport and metabolism
CC1921	CCNA_02525	-2.90045	-1.78558	Uridylate kinase	[F] Nucleotide transport and metabolism
CC2443	CCNA_02526	-1.82874	-1.62563	Aspartate carbamoyltransferase	[F] Nucleotide transport and metabolism
CC2444	CCNA_02572	-2.56199	-2.35239	Dihydroorotase	[F] Nucleotide transport and metabolism
CC2487	CCNA_02583	-3.55878	-2.71618	Adenylosuccinate lyase	[F] Nucleotide transport and metabolism
CC2497	CCNA_02586	-2.97947	-3.24004	Phosphoribosylformylglycinamidine synthase	[F] Nucleotide transport and metabolism
CC2500	CCNA_03201	-3.18113	-2.83545	Phosphoribosylformylglycinamidine synthase	[F] Nucleotide transport and metabolism
CC3103	CCNA_03745	-2.60452	-2.67346	Adenylosuccinate synthetase	[F] Nucleotide transport and metabolism
CC3630	CCNA_00671	-1.96588	-2.59762	Formyltetrahydrofolate deformylase	[F] Nucleotide transport and metabolism
CC0635	CCNA_00839	-2.33475	-2.2707	Teichoic acid translocation permease protein tagG	[G] Carbohydrate transport and metabolism
CC0797	CCNA_00863	-1.69078	-1.8047	Glucan 1,4-beta-glucosidase	[G] Carbohydrate transport and metabolism
CC0820	CCNA_01159	-2.32582	-2.4422	xylonolactonase xylC	[G] Carbohydrate transport and metabolism
CC1103	CCNA_01448	-5.13444	-4.20127	Transporter, MFS superfamily	[G] Carbohydrate transport and metabolism
CC1384	CCNA_01449	-2.23063	-2.19565	Fructose-1,6-bisphosphatase	[G] Carbohydrate transport and metabolism
CC1385	CCNA_01562	-2.96474	-2.2528	Fructose-1,6-bisphosphatase	[G] Carbohydrate transport and metabolism
CC1495	CCNA_01563	-3.49045	-4.16999	4-Hydroxy-2-oxoglutarate aldolase / 2-dehydro-3-deoxyphosphogluconate aldolase	[G] Carbohydrate transport and metabolism
CC1496	CCNA_02133	-2.7313	-3.15366	2-dehydro-3-deoxygluconokinase	[G] Carbohydrate transport and metabolism
CC2054	CCNA_02135	-2.68841	-2.26535	Glucokinase	[G] Carbohydrate transport and metabolism
CC2056	CCNA_02136	-3.71331	-3.7053	6-phosphogluconolactonase	[G] Carbohydrate transport and metabolism
CC2057	CCNA_02344	-3.9264	-3.65939	Glucose-6-phosphate 1-dehydrogenase	[G] Carbohydrate transport and metabolism
CC2261	CCNA_03358	-3.95037	-3.76698	Phosphoglycerate mutase	[G] Carbohydrate transport and metabolism
CC3248	CCNA_03359	-1.69341	-1.82883	Glyceraldehyde 3-phosphate dehydrogenase	[G] Carbohydrate transport and metabolism
CC3249	CCNA_03360	-3.58604	-3.59382	Phosphoglycerate kinase	[G] Carbohydrate transport and metabolism
CC3250	CCNA_03378	-1.87957	-2.02008	Fructose-bisphosphate aldolase	[G] Carbohydrate transport and metabolism
CC3269	CCNA_03729	-2.64887	-3.35322	Myo-inositol-1(or 4)-monophosphatase	[G] Carbohydrate transport and metabolism
CC3614	CCNA_03735	-2.52065	-2.21257	Transaldolase-like protein	[G] Carbohydrate transport and metabolism
CC3620	CCNA_03849	-3.7057	-3.43543	Transketolase	[G] Carbohydrate transport and metabolism
CC3733	CCNA_00048	-3.51034	-3.30212	Fructokinase	[G] Carbohydrate transport and metabolism
CC0050	CCNA_00257	-5.39432	-5.3216	S-adenosylmethionine synthetase	[H] Coenzyme transport and metabolism
CC0257	CCNA_00782	-4.67167	-4.38553	Adenosylhomocysteinase	[H] Coenzyme transport and metabolism
CC0745	CCNA_01175	-2.23587	-1.6481	Aminobenzoyl-glutamate transport protein	[H] Coenzyme transport and metabolism
CC1118	CCNA_02109	-2.77502	-1.87961	Uroporphyrin-III C-methyltransferase	[H] Coenzyme transport and metabolism
CC2029	CCNA_02225	-2.0748	-2.35143	Thiamine biosynthesis protein thiC	[H] Coenzyme transport and metabolism
CC2141	CCNA_02910	-2.99458	-3.58681	Transcriptional regulator, ArsR family / SAM-dependent methyltransferase	[H] Coenzyme transport and metabolism
CC2819	CCNA_00190	-2.82451	-2.45215	TonB-dependent receptor	[H] Coenzyme transport and metabolism
CC0190	CCNA_01223	-1.80238	-1.59146	Acyl-CoA hydrolase	[I] Lipid transport and metabolism
CC1165	CCNA_01746	-1.84267	-1.83812	Acyl-CoA synthetase	[I] Lipid transport and metabolism
CC1674	CCNA_01747	-2.75074	-3.5297	Malonyl-CoA-[acyl-carrier-protein] transacylase	[I] Lipid transport and metabolism
CC1675	CCNA_01812	-1.9809	-2.63056	3-oxoacyl-[acyl-carrier protein] reductase	[I] Lipid transport and metabolism
CC1738	CCNA_01961	-1.74126	-1.59271	2-C-methyl-D-erythritol 4-phosphate cytidylyltransferase / 2-C-methyl-D-erythritol 2,4-cyclodiphosphate synthase	[I] Lipid transport and metabolism
CC1884	CCNA_03764	-2.96024	-2.91796	Biotin carboxylase	[I] Lipid transport and metabolism
CC3649	CCNA_00007	-1.83841	-1.85001	Acyl-CoA thioesterase	[I] Lipid transport and metabolism
CC0007	CCNA_00033	-3.16818	-3.36086	SSU ribosomal protein S20P	[J] Translation
CC0034	CCNA_00034	-1.63776	-2.31721	Polyribonucleotide nucleotidyltransferase / Polynucleotide adenylyltransferase	[J] Translation
CC0035	CCNA_00035	-2.6519	-3.14081	SSU ribosomal protein S15P	[J] Translation
CC0036	CCNA_00041	-2.65642	-2.74684	tRNA pseudouridine synthase B	[J] Translation
CC0042	CCNA_00082	-2.64898	-2.93812	Bacterial Protein Translation Initiation Factor 2 (IF-2)	[J] Translation
CC0084	CCNA_00151	-2.7978	-2.64216	Class 1 lysyl-tRNA synthetase	[J] Translation
CC0152	CCNA_00197	-2.45519	-1.86667	Ribonuclease PH	[J] Translation
CC0197	CCNA_00198	-1.69027	-2.03044	LSU ribosomal protein L19P	[J] Translation
CC0198	CCNA_00320	-3.18093	-3.70579	tRNA (Guanine-N1) -methyltransferase	[J] Translation
CC0318	CCNA_00321	-2.15448	-2.83126	LSU ribosomal protein L27P	[J] Translation
CC0319	CCNA_00496	-3.50637	-3.97158	LSU ribosomal protein L21P	[J] Translation
CC0464	CCNA_00504	-3.13117	-2.99516	Threonyl-tRNA synthetase	[J] Translation
CC0471	CCNA_00518	-2.04206	-2.01229	23S rRNA methyltransferase	[J] Translation
CC0485	CCNA_00529	-2.48043	-4.01006	LSU ribosomal protein L25P	[J] Translation
CC0496	CCNA_00530	-2.31296	-2.83797	conserved hypothetical protein	[J] Translation
CC0497	CCNA_00677	-2.09641	-2.26293	LSU ribosomal protein L10P	[J] Translation
CC0640	CCNA_00678	-2.60954	-3.84419	LSU ribosomal protein L1P	[J] Translation
CC0641	CCNA_00699	-2.64343	-3.74275	LSU ribosomal protein L11P	[J] Translation
CC0661	CCNA_00737	-2.52415	-2.83053	LSU ribosomal protein L28P	[J] Translation
CC0701	CCNA_00758	-2.29031	-2.20978	Isoleucyl-tRNA synthetase	[J] Translation
CC0721	CCNA_00807	-2.60238	-1.82018	Protein Translation Elongation Factor P (EF-P)	[J] Translation
CC0768	CCNA_00918	-2.43835	-2.42169	Ribonuclease P protein component	[J] Translation
CC0875	CCNA_01096	-2.02109	-1.59688	Peptide release factor-glutamine N5-methyltransferase	[J] Translation
CC1044	CCNA_01097	-2.51335	-2.30997	Phenylalanyl-tRNA synthetase alpha chain	[J] Translation
CC1045	CCNA_01098	-4.05472	-4.03843	LSU ribosomal protein L20P	[J] Translation
CC1046	CCNA_01298	-3.43159	-3.97242	LSU ribosomal protein L35P	[J] Translation
CC1240	CCNA_01305	-2.12135	-2.59737	Protein Translation Elongation Factor Tu (EF-TU)	[J] Translation
CC1247	CCNA_01306	-5.72575	-4.47263	SSU ribosomal protein S10P	[J] Translation
CC1248	CCNA_01307	-4.83394	-5.02621	LSU ribosomal protein L3P	[J] Translation
CC1249	CCNA_01308	-5.75224	-4.4811	LSU ribosomal protein L1E (= L4P)	[J] Translation
CC1250	CCNA_01309	-5.1569	-4.00358	LSU ribosomal protein L23P	[J] Translation
CC1251	CCNA_01310	-5.24419	-4.36461	LSU ribosomal protein L2P	[J] Translation
CC1252	CCNA_01311	-4.7954	-3.42488	SSU ribosomal protein S19P	[J] Translation
CC1253	CCNA_01312	-5.00005	-3.82856	LSU ribosomal protein L22P	[J] Translation
CC1254	CCNA_01313	-3.77603	-2.87327	SSU ribosomal protein S3P	[J] Translation
CC1255	CCNA_01324	-3.18631	-2.27001	LSU ribosomal protein L16P	[J] Translation
CC1266	CCNA_01325	-2.36589	-2.16152	LSU ribosomal protein L30P	[J] Translation
CC1267	CCNA_01328	-2.06446	-2.55827	LSU ribosomal protein L15P	[J] Translation
CC1270	CCNA_01329	-3.33497	-3.55839	SSU ribosomal protein S13P	[J] Translation
CC1271	CCNA_01332	-3.38211	-3.89266	SSU ribosomal protein S11P	[J] Translation
CC1273	CCNA_01403	-4.15119	-3.49745	LSU ribosomal protein L17P	[J] Translation
CC1341	CCNA_01404	-2.94938	-2.61868	Glycyl-tRNA synthetase alpha chain	[J] Translation
CC1342	CCNA_01440	-2.67031	-3.10683	Glycyl-tRNA synthetase beta chain	[J] Translation
CC1376	CCNA_01441	-4.21265	-4.51887	LSU ribosomal protein L13P	[J] Translation
CC1377	CCNA_01546	-3.13828	-3.2967	SSU ribosomal protein S9P	[J] Translation
CC1478	CCNA_01739	-2.37795	-1.76431	PHNF PROTEIN	[J] Translation
CC1667	CCNA_01740	-4.421	-3.64976	LSU ribosomal protein L9P	[J] Translation
CC1668	CCNA_01741	-4.05618	-4.04904	SSU ribosomal protein S18P	[J] Translation
CC1669	CCNA_01792	-5.34502	-4.49512	SSU ribosomal protein S6P	[J] Translation
CC1721	CCNA_01813	-2.37513	-2.76483	LSU ribosomal protein L32P	[J] Translation
CC1739	CCNA_01923	-1.81974	-1.62323	tRNA-dihydrouridine synthase	[J] Translation
CC1847	CCNA_01950	-3.4779	-3.34036	ATP-dependent RNA helicase	[J] Translation
CC1874	CCNA_01954	-1.91227	-2.36211	Bacterial Peptide Chain Release Factor 2 (RF-2)	[J] Translation
CC1877	CCNA_01969	-4.403	-4.54136	Ribonuclease E	[J] Translation
CC1892	CCNA_01982	-3.66408	-3.16805	Aspartyl-tRNA synthetase	[J] Translation
CC1905	CCNA_01999	-2.86299	-2.57919	Glutamyl-tRNA synthetase	[J] Translation
CC1922	CCNA_02000	-4.49027	-3.34363	Protein Translation Elongation Factor Ts (EF-Ts)	[J] Translation
CC1923	CCNA_02008	-4.03663	-3.60375	SSU ribosomal protein S2P	[J] Translation
CC1931	CCNA_02428	-3.30942	-2.67659	Prolyl-tRNA synthetase	[J] Translation
CC2343	CCNA_02543	-2.01654	-1.72049	Bacterial Protein Translation Initiation Factor 1 (IF-1)	[J] Translation
CC2459	CCNA_02612	-2.58092	-2.82281	LSU ribosomal protein L33P	[J] Translation
CC2529	CCNA_02681	-2.47105	-2.17262	Alanyl-tRNA synthetase	[J] Translation
CC2598	CCNA_03303	-1.84417	-1.6018	Glucose inhibited division protein A	[J] Translation
CC3199	CCNA_03304	-2.18387	-2.59064	Protein Translation Elongation Factor Tu (EF-TU)	[J] Translation
CC3200	CCNA_03305	-4.23583	-4.17944	Protein Translation Elongation Factor G (EF-G)	[J] Translation
CC3201	CCNA_03306	-5.11617	-5.25307	SSU ribosomal protein S7P	[J] Translation
CC3202	CCNA_03384	-4.39297	-4.57602	SSU ribosomal protein S12P	[J] Translation
CC3275	CCNA_03406	-1.92952	-2.16104	LSU ribosomal protein L31P	[J] Translation
CC3297	CCNA_03469	-2.68731	-3.29947	SSU ribosomal protein S21P	[J] Translation
CC3359	CCNA_03628	-3.2164	-2.86447	Arginyl-tRNA synthetase	[J] Translation
CC3513	CCNA_03702	-2.08792	-1.6515	Histidyl-tRNA synthetase	[J] Translation
CC3587	CCNA_03717	-5.53679	-5.35247	SSU ribosomal protein S1P	[J] Translation
CC3603	CCNA_03767	-2.43703	-1.96441	Ribonuclease D	[J] Translation
CC3652	CCNA_03865	-5.33438	-5.34282	SSU ribosomal protein S16P	[J] Translation
CC3749	CCNA_00535	-2.14274	-2.39151	Leucyl-tRNA synthetase	[J] Translation
CC0502	CCNA_00690	-3.64795	-3.76354	hypothetical protein	[K] Transcription
CC0653	CCNA_00998	-3.43366	-3.88123	CarD-like transcriptional regulator	[K] Transcription
CC0949	CCNA_01330	-3.23507	-3.2483	Transcriptional regulator	[K] Transcription
CC1272	CCNA_02132	-3.57005	-3.68948	DNA-directed RNA polymerase alpha chain	[K] Transcription
CC2053	CCNA_03142	-2.25133	-2.17927	Transcriptional regulator, LacI family	[K] Transcription
CC3047	CCNA_03281	-3.66167	-2.94457	RNA polymerase sigma factor rpoD	[K] Transcription
CC3177	CCNA_03310	-2.60216	-2.98765	Transcriptional regulator, AsnC family	[K] Transcription
CC3205	CCNA_03868	-2.5819	-2.38975	Transcription antitermination protein nusG	[K] Transcription
CC3752	CCNA_03876	-1.58806	-1.7232	Chromosome partitioning protein parB	[K] Transcription
CC3760	CCNA_02534	-4.69927	-4.81189	Transcription termination factor rho	[K] Transcription
CC2451	CCNA_03701	-2.78249	-2.886	hypothetical protein	[L] Replication
CC3586	CCNA_00164	-1.61867	-1.75082	Integration host factor beta-subunit	[L] Replication
CC0165	CCNA_01062	-2.46719	-2.39029	O-antigen polymerase	[M] Cell wall/membrane/envelope biogenesis
CC1010	CCNA_01067	-1.83417	-1.79037	GDP-mannose 4,6 dehydratase	[M] Cell wall/membrane/envelope biogenesis
CC1015	CCNA_01584	-2.3355	-1.76961	Type I secretion outer membrane protein rsaFa	[M] Cell wall/membrane/envelope biogenesis
CC1516	CCNA_01990	-2.62932	-2.10797	Multimodular transpeptidase-transglycosylase PBP 1A	[M] Cell wall/membrane/envelope biogenesis
CC1913	CCNA_01991	-2.00098	-1.82741	UDP-3-O-[3-hydroxymyristoyl] glucosamine N-acyltransferase	[M] Cell wall/membrane/envelope biogenesis
CC1914	CCNA_01992	-2.52446	-2.36457	Hypothetical outer membrane protein	[M] Cell wall/membrane/envelope biogenesis
CC1915	CCNA_02097	-2.43325	-1.85216	Outer membrane protein assembly factor yaeT	[M] Cell wall/membrane/envelope biogenesis
CC2018	CCNA_02435	-1.59195	-1.70044	Periplasmic glucan glucosyltransferase	[M] Cell wall/membrane/envelope biogenesis
CC2350	CCNA_02634	-2.31881	-1.78402	UDP-N-acetylglucosamine 1-carboxyvinyltransferase	[M] Cell wall/membrane/envelope biogenesis
CC2551	CCNA_03062	-2.12463	-1.79481	UDP-N-acetylglucosamine--N-acetylmuramyl-(pentapeptide) pyrophosphoryl-undecaprenol N-acetylglucosamine transferase	[M] Cell wall/membrane/envelope biogenesis
CC2967	CCNA_03339	-3.83905	-3.552	Cell wall hydrolase family protein	[M] Cell wall/membrane/envelope biogenesis
CC3231	CCNA_03727	-1.82394	-1.69268	TolA protein	[M] Cell wall/membrane/envelope biogenesis
CC3612	CCNA_03752	-2.04733	-1.99039	Small-conductance mechanosensitive channel mcsS	[M] Cell wall/membrane/envelope biogenesis
CC3637	CCNA_00364	-2.73795	-2.74644	UTP--glucose-1-phosphate uridylyltransferase	[M] Cell wall/membrane/envelope biogenesis
CC0359	CCNA_00378	-3.61659	-3.00073	Deoxyhypusine synthase	[O] Posttranslational modification
CC0374	CCNA_01653	-2.01311	-1.9584	Thiol:disulfide interchange protein dsbA	[O] Posttranslational modification
CC1582	CCNA_01804	-3.01595	-2.68523	Peptidyl-prolyl cis-trans isomerase	[O] Posttranslational modification
CC1730	CCNA_01937	-2.65549	-1.89566	Glutathione peroxidase	[O] Posttranslational modification
CC1861	CCNA_01938	-2.81629	-2.24323	SufD protein	[O] Posttranslational modification
CC1862	CCNA_01940	-2.88177	-1.64007	ATP-dependent transporter sufC	[O] Posttranslational modification
CC1864	CCNA_01956	-2.71955	-1.71183	ABC transporter-associated protein sufB	[O] Posttranslational modification
CC1879	CCNA_02042	-1.76467	-1.96514	Outer membrane protein	[O] Posttranslational modification
CC1964	CCNA_02279	-4.24555	-4.35286	Trigger factor, ppiase	[O] Posttranslational modification
CC2196	CCNA_03012	-2.18514	-1.85836	Disulfide bond formation protein B	[O] Posttranslational modification
CC2918	CCNA_00130	-3.87652	-3.37789	Peroxiredoxin	[O] Posttranslational modification
CC0131	CCNA_00210	-2.14194	-1.75428	Kup system potassium uptake protein	[P] Inorganic ion transport and metabolism
CC0210	CCNA_00214	-2.43666	-2.24297	TonB-dependent receptor	[P] Inorganic ion transport and metabolism
CC0214	CCNA_00288	-2.93931	-2.75759	TonB-dependent receptor	[P] Inorganic ion transport and metabolism
CC0286	CCNA_00293	-3.88887	-3.00433	Sulfate-binding protein	[P] Inorganic ion transport and metabolism
CC0291	CCNA_00294	-2.73115	-2.37807	Phosphate transport system permease protein pstA	[P] Inorganic ion transport and metabolism
CC0292	CCNA_00352	-2.34437	-1.7517	Phosphate transport ATP-binding protein pstB	[P] Inorganic ion transport and metabolism
CC0347	CCNA_00367	-2.11537	-2.30446	Integral membrane protein	[P] Inorganic ion transport and metabolism
CC0362	CCNA_01155	-2.63196	-2.01406	Phosphonates-binding protein	[P] Inorganic ion transport and metabolism
CC1099	CCNA_01177	-2.21787	-2.29647	TonB-dependent outer membrane receptor	[P] Inorganic ion transport and metabolism
CC1119	CCNA_01399	-4.66855	-3.77603	Sulfite reductase (Ferredoxin)	[P] Inorganic ion transport and metabolism
CC1338	CCNA_01549	-4.20929	-1.706	Ammonium transporter / Methylammonium transporter	[P] Inorganic ion transport and metabolism
CC1482	CCNA_01669	-3.70704	-2.61282	Sulfate adenylyltransferase subunit 1 / Adenylylsulfate kinase	[P] Inorganic ion transport and metabolism
CC1597	CCNA_01670	-2.80751	-2.49914	Sulfate transport system permease protein cysW	[P] Inorganic ion transport and metabolism
CC1598	CCNA_02048	-3.18934	-2.40988	Sulfate transport ATP-binding protein cysA	[P] Inorganic ion transport and metabolism
CC1970	CCNA_02747	-5.5139	-4.56749	TonB-dependent receptor	[P] Inorganic ion transport and metabolism
CC2664	CCNA_03108	-3.50147	-2.10871	ABC transporter substrate-binding protein	[P] Inorganic ion transport and metabolism
CC3013	CCNA_03582	-2.98689	-1.88267	TonB-dependent outer membrane receptor	[P] Inorganic ion transport and metabolism
CC3469	CCNA_03672	-2.60813	-2.15896	3'(2'),5'-bisphosphate nucleotidase / Myo-inositol 1-(4-)phosphatase	[P] Inorganic ion transport and metabolism
CC3557	CCNA_00133	-2.43505	-1.61737	Superoxide dismutase	[P] Inorganic ion transport and metabolism
CC0134	CCNA_00212	-1.84084	-2.02965	Radical SAM family enzyme	[R] General function prediction only
CC0212	CCNA_00284	-2.25269	-2.34119	N-carbamoylputrescine amidase	[R] General function prediction only
CC0282	CCNA_00805	-2.92072	-2.37244	Hydrolase (HAD superfamily)	[R] General function prediction only
CC0766	CCNA_01050	-2.52153	-2.05453	GTP-binding protein YihA	[R] General function prediction only
CC0998	CCNA_01731	-2.0622	-1.83582	ABC transporter ATP-binding protein	[R] General function prediction only
CC1659	CCNA_01751	-1.6651	-1.59621	Colicin V production protein	[R] General function prediction only
CC1679	CCNA_01943	-1.89036	-1.91435	Hypothetical membrane associated protein	[R] General function prediction only
CC1867	CCNA_02063	-1.84146	-1.64295	Alpha/beta hydrolase	[R] General function prediction only
CC1984	CCNA_02077	-3.50906	-2.88891	Lipoprotein, ComL family	[R] General function prediction only
CC1998	CCNA_02223	-1.84348	-2.02156	Acid phosphatase surE	[R] General function prediction only
CC2139	CCNA_02231	-3.82338	-3.59691	Beta-lactamase, type II	[R] General function prediction only
CC2148	CCNA_02721	-4.03751	-3.88793	ABC transporter ATP-binding protein	[R] General function prediction only
CC2638	CCNA_02737	-1.61877	-2.07897	Peptidase, M16 family	[R] General function prediction only
CC2654	CCNA_02933	-2.39293	-2.04411	Queuosine biosynthesis protein QueF	[R] General function prediction only
CC2840	CCNA_03649	-2.49171	-3.60434	Aminopeptidase	[R] General function prediction only
CC3535	CCNA_00162	-1.61054	-1.89642	Ser/Thr kinase-related phosphotransferase	[R] General function prediction only
CC0163	CCNA_00194	-2.62549	-2.34753	Conserved hypothetical protein	[S] Function unknown
CC0194	CCNA_00374	-1.83304	-2.00948	Hypothetical cytosolic protein	[S] Function unknown
CC0369	CCNA_00495	-3.68687	-4.11589	Putative ATP synthase protein I	[S] Function unknown
CC0463	CCNA_00968	-1.9712	-1.8578	Hypothetical cytosolic protein	[S] Function unknown
CC0920	CCNA_01178	-2.14965	-1.75902	Gluconate kinase	[S] Function unknown
CC1120	CCNA_01429	-3.64575	-3.30348	Oxidoreductase	[S] Function unknown
CC1366	CCNA_01619	-1.90257	-2.03142	Ubiquinol-cytochrome C reductase chaperone	[S] Function unknown
CC1550	CCNA_01724	-1.76944	-1.75657	Hypothetical cytosolic protein	[S] Function unknown
CC1652	CCNA_01725	-2.54525	-2.1659	Hypothetical membrane associated protein	[S] Function unknown
CC1653	CCNA_01752	-3.39442	-3.19868	PQQ enzyme repeat family protein	[S] Function unknown
CC1680	CCNA_01987	-1.78582	-2.06149	Protein yicC	[S] Function unknown
CC1910	CCNA_02028	-1.6217	-1.74927	Hypothetical protein	[S] Function unknown
CC1951	CCNA_02278	-2.46236	-2.48048	NTF2 enzyme family protein	[S] Function unknown
CC2195	CCNA_02425	-2.95609	-2.0651	Putative membrane-associated alkaline phosphatase	[S] Function unknown
CC2340	CCNA_03352	-3.03894	-3.46552	non-essential pilus assembly protein	[S] Function unknown
CC3243	CCNA_03353	-2.07144	-1.72537	Hypothetical cytosolic protein	[S] Function unknown
CC3244	CCNA_03401	-1.7122	-2.39338	Hypothetical protein	[S] Function unknown
CC3292	CCNA_03428	-1.62807	-1.67245	Hypothetical cytosolic protein	[S] Function unknown
CC3319	CCNA_03705	-3.96799	-4.23971	Hypothetical cytosolic protein	[S] Function unknown
CC3590	CCNA_00053	-2.12905	-1.83326	Hypothetical protein	[S] Function unknown
CC0055	CCNA_00778	-2.00639	-1.67297	Phosphate starvation-inducible protein phoH	[T] Signal transduction mechanisms
CC0741	CCNA_00806	-4.2065	-3.74748	GTP-binding protein TypA/BipA	[T] Signal transduction mechanisms
CC0767	CCNA_01326	-4.16888	-3.55092	Inner membrane protein translocase component yidC	[U] Intracellular trafficking
CC1268	CCNA_01790	-3.2868	-3.00048	Protein translocase subunit secY	[U] Intracellular trafficking
CC1719	CCNA_02069	-3.28843	-2.88064	Protein translocase subunit secG	[U] Intracellular trafficking
CC1990	CCNA_02070	-2.83999	-2.07071	Protein translocase subunit secF	[U] Intracellular trafficking
CC1991	CCNA_02071	-2.87314	-2.16594	Protein translocase subunit secD	[U] Intracellular trafficking
CC1992	CCNA_02420	-2.80792	-2.14656	Protein translocase subunit YajC	[U] Intracellular trafficking
CC2335	CCNA_03164	-2.16422	-1.95304	TonB accessory protein exbD	[U] Intracellular trafficking
CC3068	CCNA_03311	-3.98838	-4.08113	Protein translocase subunit secA	[U] Intracellular trafficking
CC3206	CCNA_03768	-2.52401	-2.44168	Protein translocase subunit secE	[U] Intracellular trafficking
CC3653	CCNA_03793	-3.35917	-3.41134	Signal recognition particle GTPase, SRP	[U] Intracellular trafficking
CC3679	CCNA_03858	-2.15444	-1.67192	Cell division protein ftsY	[U] Intracellular trafficking
CC3742	CCNA_01061	-2.73197	-2.92245	Protein translocase subunit secB	[U] Intracellular trafficking
CC1009	CCNA_03301	-2.87793	-2.47861	Type I secretion adaptor protein rsaE	[V] Defense mechanisms
CC3197	CCNA_03830	-2.3796	-1.76193	Cation/multidrug efflux pump acrB	[V] Defense mechanisms
CC3714	CCNA_00215	-2.14515	-2.62263	Multidrug resistance protein A	[V] Defense mechanisms
CC0215	CCNA_00289	-3.94161	-4.21051	Hypothetical cytosolic protein
CC0287	CCNA_00290	-2.17743	-1.5892	Hypothetical protein
CC0288	CCNA_00372	-1.98476	-1.84977	Autotransporter protein
CC0367	CCNA_00375	-2.23468	-2.208	ATP synthase C chain
CC0371	CCNA_00636	-3.03693	-2.88193	Conserved hypothetical protein
CC0600	CCNA_00705	-1.89478	-1.9974	Hypothetical protein
CC0669	CCNA_00920	-2.06969	-2.36998	Hypothetical protein
CC0876	CCNA_01304	-2.98964	-2.93147	Hypothetical cytosolic protein
CC1246	CCNA_01801	-4.5122	-4.79581	Hypothetical protein
CC1728	CCNA_01971	-3.19668	-2.49145	Hypothetical protein
CC1894	CCNA_02098	-2.48024	-2.60679	Peptidyl-prolyl cis-trans isomerase
CC2019		-2.77064	-2.59306	Molybdopterin-guanine dinucleotide biosynthesis protein A
CC2160	CCNA_02274	-2.56612	-1.92095
CC2192	CCNA_02597	-2.32447	-2.88557	EF-Hand domain protein
CC2511	CCNA_02911	-4.07155	-2.44653	Conserved hypothetical protein
CC2820	CCNA_03216	-3.1943	-2.61704	hypothetical protein
CC3117	CCNA_03461	-1.88233	-1.76191	Hypothetical protein
CC3351	CCNA_03559	-2.19794	-1.60269	Hypothetical protein
CC3446	CCNA_03612	-2.23261	-2.4405	Hypothetical protein
CC3497		-1.72802	-2.51444	Hypothetical transcriptional regulatory protein
CC3523	CCNA_03864	-1.70955	-1.60851
CC3748		-1.94602	-1.9154	Hypothetical cytosolic protein
