# Supplementary material for: Regulatory Response to Carbon Starvation in Caulobacter crescentus
Source: PLoS One. 2011 Apr 11;6(4):e18179. doi: 10.1371/journal.pone.0018179 (PMC3073932; doi:10.1371/journal.pone.0018179)
Supplement: Table S6 — List of proteins and transcripts that are upregulated upon carbon starvation and heavy metal stress. Genes that were induced by two or more heavy metals [29], and were upregulated in carbon starvation at the level of protein or transcript. (XLS) [file pone.0018179.s006.xls]

## Sheet: SSR proteins
Table S6. List of proteins that are upregulated upon carbon starvation and heavy metal stress (supporting data for the paper "Regulatory Response to Carbon Starvation in Caulobacter crescentus" by Britos et al.)
Gene ID CB15	Gene ID NA1000	Annotation	COG
CC_0200	CCNA_00200	2OG-Fe(II) oxygenase superfamily protein	[R] General function prediction only
CC_0201	CCNA_00201	Outer membrane protein	[M] Cell wall/membrane/envelope biogenesis
CC_0247	CCNA_00247	Two-component receiver protein	[K] Transcription
CC_0248	CCNA_00248	Sensor histidine protein kinase	[T] Signal transduction mechanisms
CC_0550	CCNA_00585	Hypothetical protein	Not classified
CC_0924	CCNA_00973	Hypothetical phosphatase	[S] Function unknown
CC_1056	CCNA_01109	Hypothetical cytosolic protein	[S] Function unknown
CC_1334	CCNA_01395	Electron transfer flavoprotein-ubiquinone oxidoreductase	[C] Energy production and conversion
CC_1344	CCNA_01406	Predicted metal-dependent hydrolase	[R] General function prediction only
CC_1452	CCNA_01519	Universal stress protein family	Not classified
CC_1565	CCNA_01636	Alkaline phosphatase	[P] Inorganic ion transport and metabolism
CC_1695	CCNA_01766	Conserved hypothetical protein	[M] Cell wall/membrane/envelope biogenesis
CC_1764	CCNA_01841	Isocitrate lyase	[C] Energy production and conversion
CC_2161	CCNA_02243	D-alanyl-D-alanine serine-type carboxypeptidase	[M] Cell wall/membrane/envelope biogenesis
CC_2294	CCNA_02378	Hypothetical protein	[S] Function unknown
CC_2320	CCNA_02405	ABC membrane transporter, periplasmic component	[Q] Secondary metabolites biosynthesis
CC_2468	CCNA_02553	ATP-dependent clp protease ATP-binding subunit clpA	[O] Posttranslational modification
CC_2531	CCNA_02614	Fumarylacetoacetase	[Q] Secondary metabolites biosynthesis
CC_2536	CCNA_02619	stomatin/prohibitin-related protein	[O] Posttranslational modification
CC_2579	CCNA_02662	Aminopeptidase	[R] General function prediction only
CC_2644	CCNA_02727	PhoH protein	[T] Signal transduction mechanisms
CC_3127	CCNA_03227	TonB-dependent receptor	[P] Inorganic ion transport and metabolism
CC_3260	CCNA_03369	Hypothetical protein	Not classified
CC_3291	CCNA_03400	Hypothetical protein	[S] Function unknown
CC_3375	CCNA_03485	Membrane protease family, stomatin/prohibitin homologs	[O] Posttranslational modification
CC_3455	CCNA_03568	LemA protein	[S] Function unknown
CC_3466	CCNA_03579	Hypothetical protein	Not classified
CC_3489	CCNA_03603	Beta-lactamase family protein	[V] Defense mechanisms
CC_3559	CCNA_03674	Hypothetical protein	Not classified
CC_3597	CCNA_03711	Ribosome-associated factor Y	[J] Translation

## Sheet: SSR transcripts
Table S6. List of transcripts that are upregulated upon carbon starvation and heavy metal stress (supporting data for the paper "Regulatory Response to Carbon Starvation in Caulobacter crescentus" by Britos et al.)
Gene ID CB15	Gene ID NA1000	Annotation	COG
CC_0090	CCNA_00088	HerA helicase-related ATPase	[R] General function prediction only
CC_0200	CCNA_00200	2OG-Fe(II) oxygenase superfamily protein	[R] General function prediction only
CC_0201	CCNA_00201	outer membrane protein	[M] Cell wall/membrane/envelope biogenesis
CC_0247	CCNA_00247	two-component receiver protein	[K] Transcription
CC_0248	CCNA_00248	sensor histidine protein kinase	[T] Signal transduction mechanisms
CC_0260	CCNA_00261	ribonucleoside-diphosphate reductase beta chain	[F] Nucleotide transport and metabolism
CC_0262	CCNA_00263	hypothetical protein	Not classified
CC_0280	CCNA_00282	conserved cell surface protein	Not classified
CC_0382	CCNA_00386	DNA-3-methyladenine glycosylase	[L] Replication
CC_0510	CCNA_00544	acetyl-CoA acetyltransferase	[I] Lipid transport and metabolism
CC_0511	CCNA_00545	acetoacetyl-CoA reductase	[I] Lipid transport and metabolism
CC_0550	CCNA_00585	hypothetical protein	Not classified
CC_0658	CCNA_00695	metal-dependent hydrolase	[R] General function prediction only
CC_0673	CCNA_00709	hypothetical protein	Not classified
CC_0698	CCNA_00734	GumN superfamily protein	Not classified
CC_0781	CCNA_00822	hypothetical protein	Not classified
CC_0782	CCNA_00823	hypothetical protein	[K] Transcription
CC_0804	CCNA_00846	proline dehydrogenase/delta-1-pyrroline-5-carboxylate dehydrogenase	[C] Energy production and conversion
CC_0924	CCNA_00973	hypothetical phosphatase	[S] Function unknown
CC_0946	CCNA_00995	putative cytochrome P450 YJIB	[Q] Secondary metabolites biosynthesis
CC_0947	CCNA_00996	enoyl-CoA hydratase	[I] Lipid transport and metabolism
CC_0956	CCNA_01007	hypothetical protein	Not classified
CC_0960	CCNA_01011	imidazolonepropionase	[Q] Secondary metabolites biosynthesis
CC_1039	CCNA_01091	peptide methionine sulfoxide reductase	[O] Posttranslational modification
CC_1040	CCNA_01092	hypothetical protein	Not classified
CC_1056	CCNA_01109	conserved hypothetical cytosolic protein	[S] Function unknown
CC_1124	CCNA_01182	glutathione S-transferase	[O] Posttranslational modification
CC_1178	CCNA_01236	hypothetical cytosolic protein	[R] General function prediction only
CC_1179	CCNA_01237	hypothetical protein	Not classified
CC_1216	CCNA_01274	piperideine-6-carboxylate dehydrogenase	[C] Energy production and conversion
CC_1325	CCNA_01386	conserved hypothetical protein	Not classified
CC_1334	CCNA_01395	electron transfer flavoprotein-ubiquinone oxidoreductase	[C] Energy production and conversion
CC_1344	CCNA_01406	predicted metal-dependent hydrolase	[R] General function prediction only
CC_1427	CCNA_01494	cyclopropane-fatty-acyl-phospholipid synthase	[M] Cell wall/membrane/envelope biogenesis
CC_1452	CCNA_01519	universal stress protein family	Not classified
CC_1469	CCNA_01536	hypothetical protein	Not classified
CC_1473	CCNA_01540	hypothetical protein	Not classified
CC_1531	CCNA_01600	hypothetical protein	Not classified
CC_1532	CCNA_01601	conserved hypothetical protein	[S] Function unknown
CC_1565	CCNA_01636	alkaline phosphatase	[P] Inorganic ion transport and metabolism
CC_1605	CCNA_01677	carboxypeptidase G2 precursor	[E] Amino acid transport and metabolism
CC_1606	CCNA_01678	arginine N-succinyltransferase, beta chain	[E] Amino acid transport and metabolism
CC_1682	CCNA_01754	transglycosylase associated protein	[S] Function unknown
CC_1695	CCNA_01766	conserved hypothetical protein	[M] Cell wall/membrane/envelope biogenesis
CC_1713	CCNA_01785	hypothetical protein	Not classified
CC_1764	CCNA_01841	isocitrate lyase	[C] Energy production and conversion
CC_1856	CCNA_01932	1-acyl-sn-glycerol-3-phosphate acyltransferase	[I] Lipid transport and metabolism
CC_1986	CCNA_02065	acylamino-acid-releasing enzyme	[E] Amino acid transport and metabolism
CC_2119	CCNA_02203	hypothetical exported protein	[S] Function unknown
CC_2161	CCNA_02243	D-alanyl-D-alanine serine-type carboxypeptidase	[M] Cell wall/membrane/envelope biogenesis
CC_2200	CCNA_02283	HNH endonuclease family protein	[V] Defense mechanisms
CC_2269	CCNA_02352	membrane-bound aldehyde dehydrogenase, large subunit	[C] Energy production and conversion
CC_2270	CCNA_02353	membrane-bound aldehyde dehydrogenase iron-sulfur protein	[C] Energy production and conversion
CC_2281	CCNA_02364	methyl-accepting chemotaxis protein	[N] Cell motility
CC_2294	CCNA_02378	hypothetical protein	[S] Function unknown
CC_2320	CCNA_02405	ABC membrane transporter, periplasmic component	[Q] Secondary metabolites biosynthesis
CC_2516	CCNA_02601	glutathione-dependent formaldehyde dehydrogenase	[C] Energy production and conversion
CC_2531	CCNA_02614	fumarylacetoacetase	[Q] Secondary metabolites biosynthesis
CC_2536	CCNA_02619	stomatin/prohibitin-related protein	[O] Posttranslational modification
CC_2549	CCNA_02632	SOUL domain heme-binding protein	Not classified
CC_2579	CCNA_02662	aminopeptidase	[R] General function prediction only
CC_2609	CCNA_02692	hypothetical exported protein	[S] Function unknown
CC_2613	CCNA_02696	glutamyl-tRNA(Gln) amidotransferase subunit A	[J] Translation
CC_2618	CCNA_02701	xanthine dehydrogenase large subunit	[F] Nucleotide transport and metabolism
CC_2643	CCNA_02726	putative acetyltransferase/acyltransferase	[R] General function prediction only
CC_2644	CCNA_02727	PhoH protein	[T] Signal transduction mechanisms
CC_2645	CCNA_02728	hypothetical protein	Not classified
CC_2672	CCNA_02754	parathion hydrolase	[Q] Secondary metabolites biosynthesis
CC_2746	CCNA_02832	microsomal dipeptidase	[E] Amino acid transport and metabolism
CC_2754	CCNA_02840	transcriptional regulator	[K] Transcription
CC_2795	CCNA_02885	isochorismatase family protein	[Q] Secondary metabolites biosynthesis
CC_2796	CCNA_02886	translation initiation inhibitor	[J] Translation
CC_2798	CCNA_02888	nitrilotriacetate monooxygenase	[C] Energy production and conversion
CC_2886	CCNA_02980	tryptophan 2,3-dioxygenase	[E] Amino acid transport and metabolism
CC_3025	CCNA_03120	chemotaxis protein cheW	[N] Cell motility
CC_3031	CCNA_03126	non-hemolytic phospholipase C	[M] Cell wall/membrane/envelope biogenesis
CC_3048	CCNA_03143	PAS-family sensor histidine kinase	[T] Signal transduction mechanisms
CC_3127	CCNA_03227	TonB-dependent receptor	[P] Inorganic ion transport and metabolism
CC_3137	CCNA_03239	spermidine/putrescine-binding protein	[E] Amino acid transport and metabolism
CC_3143	CCNA_03245	omega-amino acid-pyruvate aminotransferase	[H] Coenzyme transport and metabolism
CC_3204	CCNA_03309	homoserine O-acetyltransferase	[E] Amino acid transport and metabolism
CC_3225	CCNA_03333	PAS-family sensor histidine kinase	[T] Signal transduction mechanisms
CC_3239	CCNA_03347	N-acyl-L-amino acid amidohydrolase	[E] Amino acid transport and metabolism
CC_3255	CCNA_03364	hypothetical protein	[S] Function unknown
CC_3258	CCNA_03367	chemotaxis receiver domain protein cheYIII	[K] Transcription
CC_3260	CCNA_03369	hypothetical protein	Not classified
CC_3287	CCNA_03396	trypsin-like serine protease, typically periplasmic, contains C-terminal PDZ domain	[R] General function prediction only
CC_3291	CCNA_03400	hypothetical protein	[S] Function unknown
CC_3337	CCNA_03445	aminopeptidase	[R] General function prediction only
CC_3356	CCNA_03466	hypothetical cytosolic protein	Not classified
CC_3375	CCNA_03485	membrane protease family, stomatin/prohibitin-like protein	[O] Posttranslational modification
CC_3383	CCNA_03494	serine protease	[R] General function prediction only
CC_3395	CCNA_03506	transcriptional regulator, algH	[K] Transcription
CC_3419	CCNA_03532	transporter	Not classified
CC_3455	CCNA_03568	LemA protein	[S] Function unknown
CC_3466	CCNA_03579	hypothetical protein	Not classified
CC_3473	CCNA_03587	entericidin B-like protein	Not classified
CC_3489	CCNA_03603	beta-lactamase family protein	[V] Defense mechanisms
CC_3514	CCNA_03629	hypothetical protein	Not classified
CC_3559	CCNA_03674	hypothetical protein	Not classified
CC_3597	CCNA_03711	ribosome-associated factor Y	[J] Translation
CC_3659	CCNA_03774	citrate lyase beta chain/citryl-CoA lyase subunit	[G] Carbohydrate transport and metabolism
CC_3660	CCNA_03775	conserved hypothetical protein	[S] Function unknown
CC_3663	CCNA_03778	integral membrane protein	[R] General function prediction only
CC_3710	CCNA_03825	hypothetical protein	Not classified
CC_3711	CCNA_03826	conserved hypothetical protein	[R] General function prediction only
#N/A	G6LA-105	antisense sRNA to IS1111A transposase	Not classified
CC_2468	CCNA_02553	ATP-dependent clp protease ATP-binding subunit ClpA	[O] Posttranslational modification
CC_0762	CCNA_00800	cytochrome bd-type quinol oxidase, subunit 1 cydA	[C] Energy production and conversion
CC_0763	CCNA_00801	cytochrome bd-type quinol oxidase, subunit 2 cydB	[C] Energy production and conversion
CC_2066	CCNA_02145	flagellar L-ring protein flgH	[N] Cell motility
CC_1054	CCNA_01106	antitoxin protein parD-2	[K] Transcription
CC_2879	CCNA_02973	antitoxin protein relB-3	Not classified
CC_2883	CCNA_02977	RNA polymerase ECF-type sigma factor sigU	[K] Transcription
