# Supplementary material for: Regulatory Response to Carbon Starvation in Caulobacter crescentus
Source: PLoS One. 2011 Apr 11;6(4):e18179. doi: 10.1371/journal.pone.0018179 (PMC3073932; doi:10.1371/journal.pone.0018179)
Supplement: Table S8 — Lists of genes represented in Figure 7 . Genes in the FixK carbon starvation regulon were obtained from the intersection of up- and down-regulated genes after 30 min of carbon starvation with genes with motif cc_3 according to McGrath et. al. [25], and FixK-dependent genes in hypoxia according to Crosson et. al. [27]. Genes in the LexA carbon starvation regulon were obtained from the intersection of up- (1) and down-regulated (2) genes after 30 min of carbon starvation with genes in the SOS regulon [52]. Genes in the RpoD carbon starvation regulon were obtained from the intersection of up- (1) and down-regulated (2) genes after 30 min of carbon starvation with genes with motif cc_6 according to McGrath et. al. [25]. Genes in the SigT carbon starvation regulon are listed in Table 1. The proteins encoded by SigT targets from Table 1 that are upregulated after 30 or 60 min of carbon starvation are listed here. The CtrA regulon was determined by intersecting the list of CtrA targets [24] (Table 2) with the list of genes up- and down-regulated after 30 min of carbon starvation (Table S3), and the list of proteins that are up- or down-regulated after 30 and/or 60 min of carbon starvation (Table S2). Only the genes for which the transcript and protein changed upon starvation (sets 1 and 2) were included in Figure 7. (XLS) [file pone.0018179.s008.xls]

## Sheet: FixK C starv regulon
Table S7. Lists of genes represented in Figure 7 in the paper "Regulatory Response to Carbon Starvation in Caulobacter crescentus" by Britos et al.
Genes in the FixK carbon starvation regulon in Figure 7 were obtained from the intersection of up- and down-regulated genes after 30 min of carbon starvation with genes with motif cc_3 according to McGrath et. al. (2006) (1 and 2 below) and FixK-dependent genes in hypoxia according to Crosson et. al. (2005) (3 and 4 below)
Gene ID CB15	Gene ID NA1000	Annotation	Protein change upon carbon starvation
Putative direct targets
1. carbon starvation up-regulated genes with cc_3 motif
CC_2111	CCNA_02196	Hypothetical membrane spanning protein
CC_3455	CCNA_03568	LemA protein	upregulated
CC_1401	CCNA_01467	Cytochrome cbb3 oxidase subunit I ccoN
CC_1409	CCNA_01475	OmpW family outer membrane protein
CC_0762	CCNA_00800	Cytochrome bd-type quinol oxidase, subunit 1 cydA
2. carbon starvation up-regulated genes in an operon with genes with cc_3 motif
CC_1404	CCNA_01470	Cytochrome cbb3 oxidase, diheme subunit, membrane-bound ccoP
CC_0763	CCNA_00801	Cytochrome bd-type quinol oxidase, subunit 2 cydB
CC_1406	CCNA_01472	Cation pump-linked membrane protein fixH
Putative indirect targets
3. FixK-dependent, carbon starvation upregulated genes without cc_3 motif
CC_0200	CCNA_00200	2OG-Fe(II) oxygenase superfamily protein	upregulated
CC_1363	CCNA_01425	H+ translocating pyrophosphatase
CC_1453	CCNA_01520	Conserved hypothetical protein
CC_2518	CCNA_02603	Phosphatidylserine decarboxylase
CC_3367	CCNA_03478	AraC-family transcription regulator ftrA
4. FixK-dependent, carbon starvation downregulated genes without cc_3 motif
CC_1771	CCNA_01849	Quinol cytochrome oxidase polypeptide III
CC_3406	CCNA_03517	Cytochrome c oxidase polypeptide I coxA
CC_3407	CCNA_03518	Cytochrome c oxidase polypeptide II coxB

## Sheet: LexA C starv regulon
Genes in the LexA carbon starvation regulon in Figure 7 were obtained from the intersection of up- (1) and down-regulated (2) genes after 30 min of carbon starvation with genes in the SOS regulon (da Rocha et. al. (2008)
Gene ID CB15	Gene ID NA1000	Annotation	Protein change upon carbon starvation
1. carbon starvation up-regulated LexA-dependent genes
CC_0382	CCNA_00386	DNA-3-methyladenine glycosylase
CC_1531	CCNA_01600	Hypothetical protein
CC_1532	CCNA_01601	Conserved hypothetical protein
CC_3214	CCNA_03320	Biotin carboxylase
CC_3356	CCNA_03466	Hypothetical cytosolic protein
CC_3467	CCNA_03580	Hypothetical protein
CC_1054	CCNA_01106	antitoxin protein parD-2
CC_2879	CCNA_02973	antitoxin protein relB-3
CC_2589	CCNA_02672	hypothetical protein	upregulated
1. carbon starvation down-regulated LexA-dependent genes
CC_1468	CCNA_01535	Single-strand DNA binding protein
CC_2590	CCNA_02673	Excinuclease ABC subunit A

## Sheet: RpoD C starv regulon
Genes in the RpoD carbon starvation regulon in Figure 7 were obtained from the intersection of up- (1) and down-regulated (2) genes after 30 min of carbon starvation with genes with motif cc_6 according to McGrath et. al. (2006)
Gene ID CB15	Gene ID NA1000	Annotation	Protein change upon carbon starvation
1. carbon starvation up-regulated RpoD-dependent genes
CC_0924	CCNA_00973		upregulated
CC_2912	CCNA_03006		upregulated
CC_3291	CCNA_03400		upregulated
2. carbon starvation up-regulated RpoD-dependent genes
CC_0129	CCNA_00128	Argininosuccinate synthase
CC_0253	CCNA_00253	Aspartate-semialdehyde dehydrogenase	downregulated
CC_0487	CCNA_00520	Ribose-phosphate pyrophosphokinase
CC_0654	CCNA_00691	Ferredoxin
CC_0721	CCNA_00758	Protein Translation Elongation Factor P (EF-P)	downregulated
CC_0925	CCNA_00974	OAR protein precursor
CC_1316	CCNA_01376	Glutathione S-transferase
CC_1534	CCNA_01603	Aspartate aminotransferase	downregulated
CC_1555	CCNA_01624	Orotate phosphoribosyltransferase
CC_1577	CCNA_01648	Adenosylmethionine-8-amino-7-oxononanoate aminotransferase	downregulated
CC_1596	CCNA_01668	Sulfate transport system permease protein cysT
CC_1699	CCNA_01770	Nucleoside diphosphate kinase	downregulated
CC_1724	CCNA_01795	Enolase
CC_2109	CCNA_02194	Fumarate hydratase	downregulated
CC_2261	CCNA_02344	Phosphoglycerate mutase
CC_2295	CCNA_02380	Aspartate 1-decarboxylase	downregulated
CC_2456	CCNA_02540	N-acyl-L-amino acid amidohydrolase
CC_2487	CCNA_02572	Adenylosuccinate lyase	downregulated
CC_2664	CCNA_02747	ABC transporter substrate-binding protein
CC_2929	CCNA_03024	Branched-chain amino acid aminotransferase
CC_3216	CCNA_03323	Phosphoserine aminotransferase
CC_3243	CCNA_03352	Hypothetical cytosolic protein
CC_3248	CCNA_03358	Glyceraldehyde 3-phosphate dehydrogenase
CC_3465	CCNA_03578	ATP-dependent DNA helicase recQ
CC_3469	CCNA_03582	3'(2'),5'-bisphosphate nucleotidase / Myo-inositol 1-(4-)phosphatase
CC_3614	CCNA_03729	Transaldolase-like protein
CC_3625	CCNA_03740	Cysteine synthase

## Sheet: SigT C starv regulon (proteins)
Genes in the SigT carbon starvation regulon in Figure 7 are listed in Table 1. This is the list of proteins encoded by SigT targets from Table 1 that are up-regulated after 30 or 60 min of carbon starvation.
Gene ID CB15	Gene ID NA1000	Annotation
1. Encoded by direct targets (with SigT binding motif)
CC_0164	CCNA_00163	Chain length regulator (capsular polysaccharide biosynthesis) / Tyrosine-protein kinase (capsular polysaccharide biosynthesis)
CC_0201	CCNA_00201	Outer membrane protein
2. Encoded by indirect targets (without SigT binding motif)
CC_0557	CCNA_00592	Hypothetical protein
CC_3466	CCNA_03579	Hypothetical protein

## Sheet: CtrA C starv regulon (proteins)
Genes in (1) and (2) below form part of the CtrA carbon starvation regulon in Figure 7, and was determined by intersecting the list of CtrA targets (Laub et. al., 2000) with the list of genes up- and down-regulated after 30 min of carbon starvation (Tables 2 and S3) and the list of proteins that are up- or down-regulated after 30 and/or 60 min of carbon starvation (Table S2). This is the list of …
Gene ID CB15	Gene ID NA1000	Annotation
1. Transcript AND protein up-regulated
CC_2316	CCNA_02401	Transcriptional regulator
CC_2644	CCNA_02727	PhoH protein
CC_3291	CCNA_03400	Hypothetical protein
2. Transcript AND protein down-regulated
CC_2241	CCNA_02324	Heat shock protein 33 hsp33
3. Only protein up-regulated
CC_1210	CCNA_01268	Cytochrome c
CC_0547	CCNA_00582	Hypothetical protein
CC_1353	CCNA_01415	Methyltransferase
CC_2090	CCNA_02172	Transporter
4. Only protein down-regulated
CC_0429	CCNA_00438	Hypothetical protein
CC_0233	CCNA_00233	UDP-N-acetylglucosamine 4,6-dehydratase
CC_1850	CCNA_01926	Two-component response regulator
CC_2317	CCNA_02402	Methyl-accepting chemotaxis protein
CC_2868	CCNA_02961	N-acetylneuraminate synthase
CC_3699	CCNA_03813	intermediate filament-like cell shape determinant creS
CC_3035	CCNA_03130	Cell cycle response regulator ctrA
CC_0430	CCNA_00439	Methyl-accepting chemotaxis protein
CC_3295	CCNA_03404	regulator of CtrA degradation rcdA
5. Transcript up-regulated, protein down-regulated
CC_3218	CCNA_03325	Hypothetical protein
CC_2540	CCNA_02623	Cell division protein ftsZ
6. Transcript down-regulated, protein up-regulated
CC_0050	CCNA_00048	S-adenosylmethionine synthetase
CC_0249	CCNA_00249	SCO1/SenC family protein
7. Transcript no change, protein down-regulated
CC_1902	CCNA_01979	LexA repressor
